# Supplementary material for: Integrative Analysis of Metabolome and Transcriptome Provides Insights into the Mechanism of Flower Induction in Pineapple (Ananas comosus (L.) Merr.) by Ethephon
Source: Int J Mol Sci. 2023 Dec 5;24(24):17133. doi: 10.3390/ijms242417133 (PMC10742410; doi:10.3390/ijms242417133)
Supplement: Supplementary file 1 [file ijms-24-17133-s001.zip]

Archive with 9 entries (9 files):
- Figure S1.png
- Figure S2.jpg
- Figure S3.png
- Figure S4.png
- illustration of  supplementary figures and tables.pdf
- Table S1.xlsx
- Table S2.xlsx
- Table S3.xlsx
- Table S4.xlsx
