# Supplementary material for: Integrative Analysis of Metabolome and Transcriptome Provides Insights into the Mechanism of Flower Induction in Pineapple (Ananas comosus (L.) Merr.) by Ethephon
Source: Int J Mol Sci. 2023 Dec 5;24(24):17133. doi: 10.3390/ijms242417133 (PMC10742410; doi:10.3390/ijms242417133)
Supplement: Supplementary file 1 [file ijms-24-17133-s001.zip › Table S1.xlsx]

## Sheet: Sheet1
		Table S1 The metabolites of shoot apexes or inflorescences
Name	Compounds	CAS	KEGG ID	Formula	EXACT_MASS	Class I	q1	q3	ionmode	rt	QC-01	QC-02	MBL_0d_1	MBL_0d_2	MBL_0d_3	MBL_18d_1	MBL_18d_2	MBL_18d_3	MBL_34d_1	MBL_34d_2	MBL_34d_3	MBL_8d_1	MBL_8d_2	MBL_8d_3
STD_60-18-4@+@RANK1	L-Tyrosine	60-18-4	C00082	C9H11NO3	181.074	amino acids	182.1	136.1	+	1.93	871540	7720.41	3.59579e+06	4.19634e+06	2.72332e+06	485606	809181	736342	281852	269183	9584.04	1.84031e+06	1.97636e+06	1.10232e+06
STD_332-80-9@+@RANK1	1-Methy-L-histidine	332-80-9	C01152	C7H11N3O2	169.085	amino acids	170.1	124	+	0.61	53944.1	78042.6	162062	137284	171035	125303	109015	83958.8	256437	166208	217251	104165	156310	95627.1
STD_368-16-1@+@RANK1	3-Methy-L-histidine	368-16-1	C01152	C7H11N3O2	169.085	amino acids	170.1	96.1	+	0.61	743292	577896	1.51398e+06	1.48639e+06	1.83881e+06	796928	803771	919008	1.12428e+06	1.23321e+06	1.42566e+06	920375	954858	1.02031e+06
3787@[M+H]+@RANK1	Pyrrole-2-carboxylic acid	634-97-9	C05942	C5H5NO2	111.032	Amino acid and derivatives	112	68	+	2.29	2831.47	2139.07	3266.41	3110.89	4969.61	5486.18	5575.07	4651.48	3905.78	6155.51	4067.71	2166.31	5779.92	3956.24
35949@[M+H]+@RANK1	DL-Norvaline	6600-40-4	C01826	C5H11NO2	117.079	Amino acid and derivatives	118.1	72.1	+	1.05	332322	420926	498489	428315	444197	496873	564756	360378	705425	599090	731815	380203	404736	414836
6902@[M+H]+@RANK1	5-Aminovaleric acid	660-88-8	C00431	C5H11NO2	117.079	Amino acid and derivatives	118.1	55.1	+	1.11	419574	537032	868101	817668	847426	1.01928e+06	1.03661e+06	901378	1.54791e+06	1.09678e+06	1.48899e+06	767226	931737	907564
277@[M+H]+@RANK1	N,N-Dimethylglycine	1118-68-9	C01026	C4H9NO2	103.063	Amino acid and derivatives	104.1	58.1	+	1.04	4.1461e+06	4.08298e+06	8.81199e+06	8.7617e+06	8.66808e+06	7.91317e+06	7.84053e+06	8.22954e+06	6.37352e+06	5.26126e+06	6.39467e+06	7.75697e+06	7.64009e+06	7.79907e+06
37@[M+H]+@RANK1	2-Aminoisobutyric acid	62-57-7	C03665	C4H9NO2	103.063	Amino acid and derivatives	104.1	58.1	+	0.98	4.1461e+06	4.08298e+06	8.81199e+06	8.7617e+06	8.66808e+06	7.91317e+06	7.84053e+06	8.22954e+06	6.37352e+06	5.26126e+06	6.39467e+06	7.75697e+06	7.64009e+06	7.79907e+06
3251@[M+NA]+@RANK1	5-oxoproline	98-79-3	C01879	C5H7NO3	129.043	Amino acid and derivatives	152	69	+	0.56	806823	1.09189e+06	1.02996e+06	1.03696e+06	1.21779e+06	1.74692e+06	1.80989e+06	1.99816e+06	2.09502e+06	1.93761e+06	2.32864e+06	1.23855e+06	1.36082e+06	1.21039e+06
3305@[M+H]+@RANK1	CYS-GLY_Cysteinylglycine	19246-18-5	C01419	C5H10N2O3S	178.041	Amino acid and derivatives	179	76	+	1.38	1.55603e+06	1.15801e+06	2.48256e+06	2.6066e+06	2.26059e+06	4.14636e+06	3.68737e+06	4.2371e+06	2.49224e+06	1.6838e+06	2.2582e+06	2.96055e+06	3.65145e+06	4.26023e+06
46@[M+H]+@RANK1	L-Homocitrulline	1190-49-4	C02427	C7H15N3O3	189.111	Amino acid and derivatives	190.1	101.1	+	0.72	11655.5	18622.5	5868.39	8590.81	12900	10165.9	35827.8	6082.22	33978.8	29672.5	11525.1	12625.7	4533.49	21042.4
3373@[M+H]+@RANK1	N'-Formylkynurenine	1022-31-7	C02700	C11H12N2O4	236.08	Amino acid and derivatives	237.1	163.1	+	9.51	5811.36	5275.42	6639.6	13842.5	7835.83	5556.31	2921.07	3789.77	3613.58	6406.97	10593.2	3339.8	3777.21	3938.62
44433@[M+H]+@RANK1	L-Theanine	3081-61-6	C01047	C7H14N2O3	174.1	Amino acid and derivatives	175.1	84	+	0.85	20065.2	36345.2	43785.5	33105.7	183570	100430	82020.7	23525.9	42469.7	109734	120227	51483	22550.1	20107.4
63455@[M+H]+@RANK1	Allysine(6-Oxo DL-Norleucine)	6665-12-09	C04076	C6H11NO3	145.074	Amino acid and derivatives	146.1	100.1	+	0.77	44480.6	67295	142938	70925.1	98369.8	69292.4	61213.2	53590.5	29195.5	32641.9	47647.2	86486.7	96468.8	88405
4233@[M+H]+@RANK1	N-formylmethionine	4289-98-9	C03145	C6H11NO3S	177.046	Amino acid and derivatives	178.1	61	+	0.67	1594.29	8615.09	5942.85	6008.2	4544.16	6902.83	4392.82	4162.81	9421.36	1984.03	12528	8818.18	5998.73	5803.31
4237@[M+H]+@RANK1	Phenylacetylglycine	500-98-1	C05598	C10H11NO3	193.074	Amino acid and derivatives	194.1	91.1	+	4.92	10530	7689.67	3888.12	12333.6	13675.1	14976.1	13667.7	8117.67	7923.49	14535.8	11811.9	16672.9	6433.87	24089.9
50@[M+H]+@RANK1	L-Pipecolic acid	535-75-1_3105-95-1	C00408	C6H11NO2	129.079	Amino acid and derivatives	130.1	84.1	+	0.69	9.06997e+06	1.43513e+07	4.23978e+07	3.3716e+07	3.83099e+07	2.12382e+07	8.85175e+06	1.14577e+07	1.67387e+07	1.437e+07	1.89986e+07	1.58164e+07	1.63122e+07	1.31302e+07
63103@[M+H]+@RANK1	N6-Acetyl-L-lysine	692-04-6	C02727	C8H16N2O3	188.116	Amino acid and derivatives	189.1	84.1	+	0.81	627895	764989	1.45965e+06	1.3344e+06	1.36827e+06	1.16648e+06	1.13143e+06	1.1461e+06	884076	772501	950042	1.05483e+06	1.10531e+06	1.20344e+06
69008@[M+H]+@RANK1	S-(methyl)glutathione	2922-56-7	C11347	C11H19N3O6S	321.099	Amino acid and derivatives	322.1	76	+	14.27	325.884	1028.81	158.395	301.611	197.292	1844.83	697.182	1025.6	713.854	201.107	775.167	539.477	337.964	142.166
3289@[M+H]+@RANK1	S-Adenosylmethionine	29908-03-0	C00019	C15H22N6O5S	398.137	Amino acid and derivatives	399.1	250.1	+	0.66	86199.8	146083	490983	648429	427382	606604	133937	134754	203459	169760	456014	732831	493250	429234
6334@[M+H]+@RANK1	L-Norleucine	327-57-1	C01933	C6H13NO2	131.095	Amino acid and derivatives	132.1	86.1	+	1.81	122054	78391.7	179310	161349	159867	107532	138014	244675	133645	170518	161812	131628	125730	155185
71198@[M+H]+@RANK1	Isoleucine	443-79-8	C16434_C06418	C6H13NO2	131.095	Amino acid and derivatives	132.1	86.1	+	1.8	122054	78391.7	179310	240499	492187	107532	138014	244675	133645	158930	161812	94828.5	125730	155185
288@[M+H]+@RANK1_3713@[M+H]+@RANK1	L-Homoserine	1927-25-9;672-15-1;6027-21-0	C00263	C4H9NO3	119.058	Amino acid and derivatives	120.1	56	+	0.67	293481	357408	510600	400586	417665	576206	562324	394283	446863	489423	444264	347688	359289	351409
324@[M+H]+@RANK1_3271@[M+H]+@RANK1	L-Homoglutamic acid	542-32-5;1118-90-7	C00956	C6H11NO4	161.069	Amino acid and derivatives	162.1	98.1	+	0.73	15956.7	21161	61312.4	65582.4	69773.2	26528.3	20392.8	35423.5	19820.3	18213.6	14052	23683.3	21212	15692.2
23@[M+H]+@RANK1_24@[M+H]+@RANK1	L-Isoleucine_L-Leucine	73-32-5;61-90-5	C00407;C00123	C6H13NO2	131.095	Amino acid and derivatives	132.1	86.1	+	1.78	142961	78391.7	179310	240499	492187	107532	138014	81293.3	133645	158930	161812	94828.5	125730	155185
52@[M+H]+@RANK1	L-Carnitine	541-15-1	C00318	C7H15NO3	161.105	Organonitrogen compounds	162.1	43	+	0.69	20876.1	31215.1	63230.7	36885.1	56933.5	11194.8	46985.5	18328.7	16265.2	13770.1	18344.8	32530.7	42209	26252.6
35@[M+H]+@RANK1_STD_72-18-4@+@RANK1	L-Valine	72-18-4	C00183	C5H11NO2	117.079	Amino acid and derivatives;amino acids	118.1	72.1	+	0.93	295800	420926	460258	376417	502125	387471	432892	412826	663524	572450	610907	357132	417395	356117
32@[M+H]+@RANK1_STD_72-19-5@+@RANK1	L-Threonine	72-19-5	C00188	C4H9NO3	119.058	Amino acid and derivatives;amino acids	120.1	56.1	+	0.64	293481	357408	510600	400586	417665	576206	562324	394283	446863	489423	444264	347688	359289	351409
29@[M+H]+@RANK1_STD_147-85-3@+@RANK1	Proline;L-Proline	147-85-3	C00148	C5H9NO2	115.063	Amino acid and derivatives;amino acids	116.1	70.1	+	0.73	1.46916e+07	1.18762e+07	8.71784e+06	1.23338e+07	1.29111e+07	2.27804e+07	2.58928e+07	2.42715e+07	1.99887e+07	1.80767e+07	2.03637e+07	1.35319e+07	1.9371e+07	1.53726e+07
30@[M+H]+@RANK1_STD_56-45-1@+@RANK1	L-Serine	56-45-1	C00065	C3H7NO3	105.043	Amino acid and derivatives;amino acids	106	60	+	0.62	530679	572578	464690	519155	551425	639298	721697	729832	510281	533479	541787	595071	767940	638930
13@[M+H]+@RANK1_STD_74-79-3@+@RANK1	L-Arginine	74-79-3	C00062	C6H14N4O2	174.112	Amino acid and derivatives;amino acids	175.1	70.05	+	0.6	990610	1.01814e+06	7.31971e+06	8.05165e+06	7.5051e+06	4.12584e+06	4.34899e+06	3.32441e+06	8.39591e+06	5.25127e+06	6.01048e+06	1.38147e+06	2.03481e+06	1.50956e+06
14@[M+H]+@RANK1_STD_70-47-3@+@RANK1	L-Asparagine	70-47-3	C00152	C4H8N2O3	132.053	Amino acid and derivatives;amino acids	133.1	74	+	0.64	5.53432e+06	6.30325e+06	2.88619e+06	2.68896e+06	3.04374e+06	3.65801e+06	4.2038e+06	3.78537e+06	1.81766e+07	1.50655e+07	1.79262e+07	2.04523e+06	2.32336e+06	2.1433e+06
27@[M+H]+@RANK1_STD_70-26-8@+@RANK1	L-Ornithine	70-26-8	C01602;C00077	C5H12N2O2	132.09	Amino acid and derivatives;amino acids	133.1	70.1	+	0.55	1.09532e+06	1.26943e+06	758481	813343	750296	773773	800741	593.082	3.60147e+06	3.1606e+06	1202.98	462392	526349	643015
15@[M+H]+@RANK1_STD_56-84-8@+@RANK1	L-Aspartic acid	56-84-8	C00049	C4H7NO4	133.038	Amino acid and derivatives;amino acids	134	74	+	0.63	1.26698e+06	1.3715e+06	1.40289e+06	1.58508e+06	1.49098e+06	1.49857e+06	1.52874e+06	1.20529e+06	1.9955e+06	1.72481e+06	2.03351e+06	1.42491e+06	1.73341e+06	1.7004e+06
16@[M+H]+@RANK1_STD_372-75-8@+@RANK1	L-Citruline;L-Citrulline	372-75-8	C00327	C6H13N3O3	175.096	Amino acid and derivatives;amino acids	176.1	70.1	+	0.66	270884	375358	516691	586810	759996	338120	361008	533028	593648	388939	401386	490635	403770	257341
19@[M+H]+@RANK1_STD_56-86-0@+@RANK1	L-Glutamic acid	56-86-0	C00025	C5H9NO4	147.053	Amino acid and derivatives;amino acids	148.1	84	+	0.66	1.39766e+07	1.66773e+07	1.35886e+07	1.70246e+07	1.71759e+07	2.28628e+07	2.68111e+07	2.03373e+07	2.20419e+07	1.63661e+07	1.78652e+07	2.7752e+07	3.48248e+07	2.86785e+07
21@[M+H]+@RANK1_STD_71-00-1@+@RANK1	L-Histidine	71-00-1	C00135	C6H9N3O2	155.069	Amino acid and derivatives;amino acids	156.1	110.1	+	0.59	5.10091e+06	5.38359e+06	2.02434e+07	2.38242e+07	23715373	6.07123e+06	5.00504e+06	5.97971e+06	4.07894e+06	3.26171e+06	4.47462e+06	8.02863e+06	4.39992e+06	7.03266e+06
257@[M+H]+@RANK1_STD_51-35-4@+@RANK1	trans-4-Hydroxy-L-proline;4-Hydroxyproline	51-35-4	C01157	C5H9NO3	131.058	Amino acid and derivatives;amino acids	132.1	86.05	+	0.65	279534	243332	623482	476887	667229	218005	281608	268153	305356	219022	266728	381805	400444	320475
26@[M+H]+@RANK1_STD_63-68-3@+@RANK1	L-Methionine	63-68-3	C00073	C5H11NO2S	149.051	Amino acid and derivatives;amino acids	150.05	56.1	+	0.94	281097	537449	626537	603635	695551	659332	598067	651166	843168	710020	1.01488e+06	579528	1.20457e+06	1.16398e+06
25@[M+H]+@RANK1_STD_56-85-9@+@RANK1;STD_56-87-1@+@RANK1	L-Lysine;L-Glutamine	56-87-1;56-85-9	C00047;C00064	C6H14N2O2;C5H10N2O3	146.106	Amino acid and derivatives;amino acids	147.1	84.0667	+	0.64	1.41796e+07	1.1675e+07	9.92997e+06	8.03568e+06	7.75281e+06	2.2436e+07	1.95515e+07	2.39469e+07	3.88973e+07	3.01744e+07	3.94173e+07	1.37027e+07	1.67048e+07	1.61134e+07
28@[M+H]+@RANK1_63528@[M+H]+@RANK1;65707@[M+H]+@RANK1;STD_63-91-2@+@RANK1	L-Phenylalanine;D-(+)-Phenylalanine;DL-Phenylalanine	63-91-2;673-06-3;150-30-1	C00079;C02265;C02057	C9H11NO2	165.079	Amino acid and derivatives;Phenols;amino acids	166.1	120.1	+	2.82	1.05945e+07	1.11994e+07	2.83905e+07	2.45526e+07	2.92137e+07	2.88452e+07	2.96056e+07	2.6362e+07	4.96041e+06	5.01681e+06	5.40985e+06	2.62172e+07	3.40693e+07	3.24547e+07
11@[M+H]+@RANK1_63614@[M+H]+@RANK1;STD_56-41-7@+@RANK1	L-Alanine;DL-Alanine	56-41-7;302-72-7	C00041;C01401	C3H7NO2	89.0477	Amino acid and derivatives;Alkaloids;amino acids	90.1	44	+	0.64	275819	285707	337286	293087	308226	478904	529219	470423	385875	436089	463055	408516	418484	423658
33@[M+H]+@RANK1_65364@[M+H]+@RANK1;65534@[M+H]+@RANK1;STD_73-22-3@+@RANK1	L-Tryptophan;D-Tryptophan;Tryptophan	73-22-3;153-94-6;54-12-6	C00078;C00525;C00806	C11H12N2O2	204.09	Amino acid and derivatives;Indoles and derivatives;Alkaloids;amino acids	205.1	188.1	+	3.77	302094	471837	1.8634e+06	1.89894e+06	1.83741e+06	768816	725619	716082	42713.1	44980.4	55394.3	887469	883505	862803
43510@[M+H]+@RANK1	Alpha-caryophyllene	6753-98-6	C09684	C15H24	204.188	Sesquiterpenoids	205.2	81.1	+	11.58	22350.8	36206.4	30902.6	58605	55114	32262.7	24248.7	22223.4	41596.5	11751.3	21686.7	27541.3	28381.5	31897.6
64101@[M+H]+@RANK1	trans-Caryophyllene	87-44-5	C09629	C15H24	204.188	Sesquiterpenoids	205.2	95.1	+	12.12	30214.9	32035.7	22263	24019	20913.8	27004.7	22436.3	55642	27791.7	18654.8	26768.8	23782.9	77273.1	29105
67580@[M+H]+@RANK1	Anisatin	5230-87-5	C09294	C15H20O8	328.116	Sesquiterpenoids	329.1	311.1	+	5.42	3605.09	2745.14	15606.1	8395.81	6065.45		23652.9	25467.2	8497.98	4917.19	26962.3	5346.96	2250.59	3853.41
71423@[M+H]+@RANK1	Caryophyllene oxide	1139-30-6	C16908	C15H24O	220.183	Sesquiterpenoids	221.2	105.1	+	11.66	93662.9	28694.1	53905.2	33842	76860.7	36753.6	102557	69969.6	82710.3	119234	137457	69329.7	55362.7	30384.6
92039@[M+H]+@RANK1	alpha-Cyperone	473-08-5	C17090	C15H22O	218.167	Sesquiterpenoids	219.2	67.1	+	12.2	16236.7	40638.9	18741.8	28594	22139.7	23568.1	20545.2	36591.8	35934.7	28062.6	24161.6	51416.9	41654.3	27338.6
67838@[M+H]+@RANK1	Xanthatin	26791-73-1	C09601	C15H18O3	246.126	Sesquiterpenoids	247.1	229.1	+	8.39	3167.6	5537.55	3858.26	3516.43	1904.48	3001.95	3008.01	1531.36	4991.02	3228.48	7233.3	4494.45	2330.39	1061.23
92924@[M+H]+@RANK1	Curcolone	17015-43-9		C15H18O3	246.126	Sesquiterpenoids	247.1	229.1	+	8.37	3167.6	5537.55	8223.02	3516.43	3585.91	3001.95	3008.01	1531.36	2173.07	3228.48	7233.3	4494.45	3590	1061.23
532@[M+H]+@RANK1	Artemisinin	63968-64-9	C09538	C15H22O5	282.147	Sesquiterpenoids	283.2	110.1	+	13.02	924020	914180	1.49117e+06	1.28762e+06	1.58746e+06	1.7662e+06	1.18596e+06	1.17907e+06	1.27664e+06	751926	1.4154e+06	1.24535e+06	1.25113e+06	1.53853e+06
53412@[M+H]+@RANK1	Alantolactone	546-43-0	C09289	C15H20O2	232.146	Sesquiterpenoids	233.2	105.1	+	11.93	27262.2	34391.3	135460	88928.3	111817	96029.8	80179.4	48606.3	45927.5	62215.3	48797.6	137957	37455	35523.5
67738@[M+H]+@RANK1	Isoalantolactone	470-17-7	C09484	C15H20O2	232.146	Sesquiterpenoids	233.2	105.1	+	12.31	56189.3	34162.7	48245.7	53130.6	34234.4	33056.7	41685.2	61218.9	63577.7	62215.3	82378.7	11536.8	30749.6	19764
67649@[M+H]+@RANK1	Costunolide	553-21-9	C09382	C15H20O2	232.146	Sesquiterpenoids	233.2	161.1	+	12.21	15483.3	15780.7	20428.8	19540.5	10493.8	15765.6	10507.8	33565.4	14833.8	27006	16731.4	15703.1	14905.6	16488
71332@[M+H]+@RANK1	Bisabolol oxide A	22567-36-8	C16773	C15H26O2	238.193	Sesquiterpenoids	239.2	55.1	+	11.5	33186.1	38332.3	58676.7	44936.6	25015.8	47906.1	36800.7	51074.6	46061	57611.9	52980.3	51504.8	39072.2	61005.6
67744@[M+H]+@RANK1	Lactupicrin	65725-11-3	C09490	C23H22O7	410.137	Sesquiterpenoids	411.1	259.1	+	13.8	2172.17	2809.57	2782.22	3426.13	2880.86	2322.48	2034.08	2674.64	2042.32	4248.85	2544.79	2742.27	2912.95	3257.45
67810@[M+H]+@RANK1	Epitulipinolide diepoxide	39815-40-2	C09568	C17H22O6	322.142	Sesquiterpenoids	323.1	263.1	+	11.87	11044.9		8112.19	19091.7	8251.13	5614.36	8854.6	4098.32	1592.46		7386		3059.24	3228.53
71855@[M+H]+@RANK1	Cryptomeridiol	4666-84-6	C17676	C15H28O2	240.209	Sesquiterpenoids	241.2	223.2	+	3.24	4724.18	3668.95	1967.42	2397.44	4041.99	9620.07	3190	2206.14	4125.45	1467.44	4339.46	3916.31	2453.78	3589.57
53458@[M+H]+@RANK1	Valerenic acid	3569-10-06	C09743	C15H22O2	234.162	Sesquiterpenoids	235.2	161.1	+	11.24	134309	26566	45404.3	158225	36666.4	49411.9	20027.6	47224.9	168190	182291	48903.5	102000	193782	13229.3
91028@[M+H]+@RANK1	beta-Costic acid	3650-43-9		C15H22O2	234.162	Sesquiterpenoids	235.2	189.2	+	8.9	15087.3	9168.7	10381.6	12228.6	5041.31	6368.73	10070.1	6279.23	7781.88	10883.8	6068.64	2941.47	9684.49	5018.73
92888@[M+H]+@RANK1	Curzerene	17910-09-7		C15H20O	216.151	Sesquiterpenoids	217.2	55.1	+	2.55	30390	50386.2	49541	53057.5	89178.3	75669.8	68049.5	63788.2	143218	130768	150040	59854.3	40961.4	46314.4
67751@[M+H]+@RANK1	Lipiferolide	41059-80-7	C09497	C17H22O5	306.147	Sesquiterpenoids	307.2	247.1	+	5.36	11019.2	35357	236595	228381	23656.2	8284.3	5566.9	4558.22	6437.87	6133.36	10665	9070.09	38627.3	24807.5
71441@[M+H]+@RANK1	Catalpalactone	1585-68-8	C16929	C15H14O4	258.089	Sesquiterpenoids	259.1	67.1	+	12.84	6149.74	11492.4	5886.83	8212.78	15288.2	11842.7	2231.24	10455.1	17257.6	3358.77	6773.56	28195.9	9611.03	5969.24
92870@[M+H]+@RANK1	Curcumol	4871-97-0		C15H24O2	236.178	Sesquiterpenoids	237.2	57.1	+	11.14	47931.3	74444.9	17107.7	20141	83955.6	14541.6	12056.5	55434.5	54974.3	8321.35	62334.7	97527.8	70859.2	62692.3
95433@[M+H]+@RANK1	7beta-(3-Ethyl-cis-crotonoyloxy)-1alpha-(2-methylbutyryloxy)-3,14-dehydro-Z-notonipetranone	80514-14-3		C26H38O5	430.272	Sesquiterpenoids	431.3	55.1	+	13.87	3822.91	4020.38		8343.67	3123.82	3070.17	4145.39	8307.76	4813.13	4820.55	7047.02	9900.24	8188.37
67698@[M+H]+@RANK1	Eupatolide	6750-25-0	C09440	C15H20O3	248.141	Sesquiterpenoids	249.1	231.1	+	7.18	2758.89	3154.67	1383.14	3372.3	1701.1	529.228	798.762	1366.23	789.293	2094.52	533.164	3960.36	1655.29	549.236
88081@[M+H]+@RANK1	1beta-Hydroxyalantolactone	68776-47-6		C15H20O3	248.141	Sesquiterpenoids	249.1	231.1	+	5.26	7254.15	7364.85	2008.88	4124.74	8199.92	6044.17	5506.5	6016.86	9605.04	5634.44	3517.67	3531.16	4432.11	4704.59
90538@[M+H]+@RANK1	Pterosin D	34169-70-5		C15H20O3	248.141	Sesquiterpenoids	249.1	231.1	+	3.29	2878.58	6113.65	1924.83	1814.16	2902.62	3659.05	3578.43	4120.76	2850.37	2325.79	3394.2	1804.19	13082.7	3497.02
53322@[M]+@RANK1	Terpinolene	586-62-9	C06075	C10H16	136.125	Monoterpenoids	136.1	93.1	+	10.57	10676	8410.67	6613.53	9145.1	6518.7	5313.34	24132	10294.3	5496.87	11367.5	8133.95	7348.55	5871.62	4242.21
43968@[M+H]+@RANK1	Cantharidin	56-25-7	C16778	C10H12O4	196.074	Monoterpenoids	197.1	95.1	+	6.03	19574.1	5973.97	9464.87	13467.6	14904.3	9218.89	14040.4	13552.3	7745.42	7139.69	12514.8	13746.7	10227.8	16355.8
46188@[M+H]+@RANK1	Geranylacetate	105-87-3	C09861	C12H20O2	196.146	Monoterpenoids	197.2	81.1	+	9.58	18868.5	15270.2	24665.5	11029.2	13831.7	18467.7	12438.1	12379.1	13185.6	19178.8	23665.7	27505.7	13202.8	14136.6
58320@[M+H]+@RANK1	Picrocrocin	138-55-6	C17055	C16H26O7	330.168	Monoterpenoids	331.2	151.1	+	9.25	5717.96	2160.57	7558.35	8684.84	5528.21	11653.4	13724.7	11908.7	5215.57	7057.83	10130.1	8114.73	9028.42	7871.38
41086@[M+H]+@RANK1	Myrcene	123-35-3	C06074	C10H16	136.125	Monoterpenoids	137.1	53	+	11.74	27116.4	33468.4	48210.7	23610.9	23010.2	30227.9	11664.8	31219	21888.3	11343.6	36627.5	23239.2	17420	72623.3
84985@[M+NA]+@RANK1	Nerylacetate	141-12-8		C12H20O2	196.146	Monoterpenoids	219.1	81.1	+	8.37	6916.13	8634.63	17747.8	20844.1	10383.2	10937.5	9575.74	5065.79	5524.06	9226.21	5034.11	3919.69	3822.14	3890.8
41091@[M+H]+@RANK1	p-Cymene	99-87-6	C06575	C10H14	134.11	Monoterpenoids	135.1	93.1	+	11.62	7383.7	15905	26972.9	16872.5	29285.1	11881.1	18864	21737.9	15046	17208.9	36135.1	34128.8	33089	23292.5
92922@[M+H]+@RANK1	2,6-Dimethyl-7-octene-2,3,6-triol	73815-21-1		C10H20O3	188.141	Monoterpenoids	189.1	153.1	+	3.82	2936.7	6323.43	19123.6	17137.8	19040	7135.55	6814.02	8573.08	942.833	1230.72	1045.7	11808	6968.15	8411.04
91109@[M+H]+@RANK1	2-(2-Hydroxy-2-propyl)-5-methyl-5-vinyltetrahydrofuran	60047-17-8		C10H18O2	170.131	Monoterpenoids	171.1	55.1	+	5.47	8197.25	8602.68	13920.6	9962.46	8447.14	8097.68	10088	14435	14111.3	18450.1	29797.7	9273.85	12221.6	9583.54
44004@[M+H]+@RANK1	Citronellyl acetate	141-11-7_150-84-5	C12298	C12H22O2	198.162	Monoterpenoids	199.2	55.1	+	10.48	7855.37	5624.87	4466	11896.7	9170.49	6491.27	7421.07	7048.04	3212.21	6948.29	6724.68	7882.96	3788.04	14889.9
67978@[M+H]+@RANK1	(1R)-(-)-Menthyl acetate	2623-23-6	C09870	C12H22O2	198.162	Monoterpenoids	199.2	157.2	+	10.49	8153.84	5519.25	8406.84	7974.39	10362.3	7973.72	6865.01	16675.1	5552.38	2354.41	3494.42	6473.09	5894.41	2346.58
41071@[M+H]+@RANK1_53347@[M+H]+@RANK1	(-)-Borneol;(+)-Borneol	464-45-9;464-43-7	C01766;C01765	C10H18O	154.136	Monoterpenoids	155.1	137.1	+	3.42	3906.38	5286.99	3293.69	4457.92	1942.08	3339.19	5021.99	6375.34	1600.52	3859.49	2539.18	3971.25	2486.4	4637.9
91248@[M+H]+@RANK1_91249@[M+H]+@RANK1	Isopulegol	7786-67-6;89-79-2		C10H18O	154.136	Monoterpenoids	155.1	137.1	+	2.46	3069.34	4897.5	2995.53	6603.85	6330.16	2367.07	3879.18	4108	8272.43	6568.7	6878.65	4736.51	2969.41	5855.37
41101@[M+H]+@RANK1_41120@[M+H]+@RANK1_91004@[M+H]+@RANK1	beta-Citronellol;(S)-(-)-beta-Citronellol	106-22-9;1117-61-9;7540-51-4	C09849;C11386	C10H20O	156.151	Monoterpenoids	157.2	139.1	+	1.41	8299.4	13066.6	17599.8	13272.3	20804.4	31397.3	14385.9	13186.6	23811.7	25773	18406.5	17467.4	12050.9	13127.9
64043@[M+H]+@RANK1_71308@[M+H]+@RANK1	Alpha-Terpineol;Patulin	10482-56-1;149-29-1	C11393;C16748	C10H18O;C7H6O4	154.136	Monoterpenoids;Pyrans	155.05	137.05	+	3.46	3906.38	5286.99	3293.69	4457.92	1942.08	4593.24	5021.99	6375.34	1680.93	3859.49	2539.18	3971.25	4005.15	4637.9
84974@[M+H-H2O]+@RANK1	Kirenol	52659-56-0		C20H34O4	338.246	Diterpenoids	321.2	81.1	+	13.16	1.0513e+06	1.00026e+06	1.32813e+06	1.07367e+06	1.01731e+06	1.18197e+06	891948	1.10856e+06	1.06276e+06	1.23477e+06	726642	802754	928548	493474
67448@[M+H]+@RANK1	Lathyrol	34420-19-4	C09125	C20H30O4	334.214	Diterpenoids	335.2	317.2	+	7.15	1372.28	5172.24	4386.23	2961.89	3328.03	1391.29	3823.79	4408.7	1937.75	1685.44	5152.3	2634.79	3078.5	6724.09
91786@[M+H]+@RANK1	ent-16beta,17-dihydroxy-9(11)-kauren-19-oic acid	55483-24-4		C20H30O4	334.214	Diterpenoids	335.2	271.2	+	7.15	263.64	4371.69	1782.61	6657.67	5875.03	6241.51	1937.16	3760.17	1106.44	1908.77	814.242	2013.47	3840.36	866.97
91683@[M+H]+@RANK1	Methyl tanshinonate	18887-19-9		C20H18O5	338.115	Diterpenoids	339.1	171.1	+	11.43	6810.99	10100.5	40846.5	32654.2	35185.8	28296.8	34911.1	50198.9	17203.7	7972.06	4345.5	15346.3	16635.6	23114
90675@[M+H]+@RANK1	Sterebin E	114343-74-7		C20H34O4	338.246	Diterpenoids	339.3	303.2	+	13.19	10853.1	15042.9	30916.1	14478.6	15724.2	22361.4	17886.6	19278.2	13353.4	5191.4	24214.8	11469.4	20247.8	32746.4
90637@[M+H]+@RANK1	Sterebin A	107647-14-3		C18H30O4	310.214	Diterpenoids	311.2	293.2	+	11.75	117534	143772	351240	508208	561667	284778	263745	319079	108640	102142	107721	506600	258149	168633
67182@[M+H]+@RANK1	(+)-Glaucarubinone	1259-86-5	C08763	C25H34O10	494.215	Diterpenoids	495.2	477.2	+	5.79	2352.11	6944.68	3015.52	11060	11400.8	4146.58	7202.2	6942.88	10884	7153.09	11914.1	5507.46	1360.63	3405.87
90448@[M+H]+@RANK1	Diosbulbin D	66756-57-8		C19H20O6	344.126	Diterpenoids	345.1	327.1	+	2.63	704.424	3085	4178.45	3085.8	7532.11	1791.83	681.884	8713.04	4361.74	7621.46	4292.02	3153.19	3792.78	3095.21
41244@[M+H]+@RANK1	Ginkgolide A	15291-75-5	C07601	C20H24O9	408.142	Diterpenoids	409.1	79	+	8.27	5397.71	6244.35	29271.8	8111.76	21450.8	12257	6073.83	14325.6	2713.13	7615.03	11793.5	9072.48	21135.3	23127.6
69654@[M+H]+@RANK1	Miltirone	27210-57-7	C13715	C19H22O2	282.162	Diterpenoids	283.2	55.1	+	12.98	6.04971e+06	5.80583e+06	1.14045e+07	1.04696e+07	1.65458e+07	1.17917e+07	1.14277e+07	8.72459e+06	1.0474e+07	6.1426e+06	8.78625e+06	1.00897e+07	1.14425e+07	1.42011e+07
67171@[M+H]+@RANK1	Bruceine D	21499-66-1	C08752	C20H26O9	410.158	Diterpenoids	411.2	393.2	+	4.84	5518.5	6630.53	3996.56	7384.57	10558.9	17399.5	9116.8	27202.4	15005.6	20061.6	34672.2	14479	17834	9394.36
44654@[M+H]+@RANK1	Mevastatin	73573-88-3	C13963	C23H34O5	390.241	Diterpenoids	391.2	185.1	+	12.07	9451.34	6336.79	9018.48	7589.6		6559.49	4780.5	23961.7	1590.74	5822.33	11881.5	2757.98	16509.7	11193.6
53595@[M+H-H2O]+@RANK1	Sclareol	515-03-7	C09183	C20H36O2	308.272	Diterpenoids	291.3	273.3	+	10.62	4603.07	5179.5	2381.86	10329.5	13728	4438.44	18097.3	7644.59	10015.5	8112.9	8035.89	6649.13	13310.7	4965.8
53686@[M+H]+@RANK1	12-O-tetradecanoylphorbol-13-acetate	16561-29-8	C05151	C36H56O8	616.398	Diterpenoids	617.4	581.4	+	12.49	10297.7	3400.68	9720	2975.92	8689	9883.66	1363.35	5512.88	8072.38	5828.73	10227	8595.18	3357
58131@[M+NA]+@RANK1	Crocin	42553-65-1	C08589	C44H64O24	976.379	Diterpenoids	999.4	675.3	+	7.05		5763.72	6800.74	5079.24	9735.49	892.265	9112.94	5999.36	2095.57		293.02	11029.7	15482.2	17975.4
84958@[M+NA]+@RANK1	Dulcoside A	64432-06-0		C38H60O17	788.383	Diterpenoids	811.4	649.3	+	7.54	1695.79	4349.31	6004.48	4370.06	10217.9	5981.91	3075.46	1915.73	937.337	4142.08	3394.7	3041.93	6088.48	14412.2
64748@[M+H]+@RANK1	Baccatin III	27548-93-2	C11900	C31H38O11	586.241	Diterpenoids	587.2	105	+	9.95	2381.99	3424.24	3991.9	6963.66	5253.24	6727.79	1882.97	9583.75	1133.5	2359.4	1398.35	10587.9	5573.36	2187.59
67170@[M+H]+@RANK1	Bruceine B	25514-29-8	C08751	C23H28O11	480.163	Diterpenoids	481.2	421.1	+	11.19	1871	6579	9270.76	15169.5	6409.51	4017	10235.4	3529.83	1478.74	1902.68	8470.11	9752.01	1074.09	4279.06
93212@[M+H]+@RANK1	Goshonoside F1	90851-24-4		C26H44O8	484.304	Diterpenoids	485.3	449.3	+	12.3	17318.9	5543.21	10330.1	14743.2	3585.35	5487.4	7724.88	3814.1	5554.39	6907.91	8250.99	7709.77	8920.48
90487@[M+H]+@RANK1	6,7-Dehydroferruginol	34539-84-9		C20H28O	284.214	Diterpenoids	285.2	269.2	+	9.06	2665.03	5209.53	4126.98	7579.39	3505.97	3145.31	7195.37	8249.44	5698.25	5915.43	3683.15	7799.57	2849.67	6397.61
2277@[M+H]+@RANK1	Retinoic acid	302-79-4	C00777	C20H28O2	300.209	Diterpenoids	301.2	123.1	+	8.46	2636.56	7261.53	6386.44	5339.49	12962	8164.12	4179.97	6409.34	10026.7	4925.91	5342.87	9003.57	5764.99	5745.9
67167@[M+H]+@RANK1	Ailanthone	981-15-7	C08747	C20H24O7	376.152	Diterpenoids	377.2	359.1	+	3.69	1441.3	4745.56	6176.92	3031.71	7041.59	4273.56	2621.93	3233.13	3337.67	803.012	8583.75	4137.13	5817.72	1672.14
67511@[M+H]+@RANK1	Tripdiolide	38647-10-8	C09202	C20H24O7	376.152	Diterpenoids	377.2	359.1	+	5.14	14424.1	3632.66	7871.21	14987.1	9889.9	15990.7	16919.4	10590.2	5553	3891.99	10022.4	26688.3	11730.5	29231.9
41215@[M+H]+@RANK1	Abietic acid	514-10-3	C06087	C20H30O2	302.225	Diterpenoids	303.2	285.2	+	5.2	4804.6	2906.41		2358.9	2957.26	1770.5	1183.92	4156.24	3953.03	4544.76	6994	2420.73	2413.4	7102.84
67399@[M+H]+@RANK1	Cafestol_Caffeyl alcohol	469-83-0	C09066	C20H28O3	316.204	Diterpenoids	317.2	281.2	+	5.47	7224.84	2093.49		3475.55	4139.48	1080.45			5726.06	2107.82	1078.24		2705.06	10688.2
2443@[M+H]+@RANK1	Simvastatin	79902-63-9	C07262	C25H38O5	418.272	Diterpenoids	419.3	199.1	+	8.07	9478.36	15484.2	68922.7	71627.4	80159.3	17564.1	39985.9	30726.8	30247.4	5807.04	16152.5	47918.2	25814.9	47423.1
67178@[M+H]+@RANK1_67436@[M+H]+@RANK1	Eurycomalactone;Ingenol	23062-24-0;30220-46-3	C08759;C09112	C19H24O6;C20H28O5	348.157	Diterpenoids	349.2	331.2	+	5.79	3764.09	7370.23	8313.51	10541.5	10782.3	14312.1	14280.3	9098.36	11862.8	21477	14209.6	8139.18	25552.5	10472.6
34477@[M+H]+@RANK1	Lupeol	545-47-1	C08628	C30H50O	426.386	Triterpenoids	427.4	109.1	+	11.9	6420.8	39280.9	21262.9	36078.8	21630	30832.9	9738.27	30869.5	32849.9	45085.7	18087.6	23019.6	35967.8	21091.5
53798@[M+H]+@RANK1	Simiarenol	1615-94-7	C17901	C30H50O	426.386	Triterpenoids	427.4	409.4	+	12.65	54097.2	77795.7	87241.7	30520.6	90852.8	99057.2	64775.4	49141	94113.2	77311.2	39160.5	47071.3	155644	109298
71962@[M+H]+@RANK1	Shionone	10376-48-4	C17966	C30H50O	426.386	Triterpenoids	427.4	409.4	+	12	9639.71	22773.3	33088.9	20781.8	57165.3	34523.6	26224.9	28517.7	19636.3	8236.5	14352	16706.7	50270.6	21822.4
73386@[M+H]+@RANK1	Germanicol	465-02-1	C19833	C30H50O	426.386	Triterpenoids	427.4	409.4	+	12.63	38120.9	59016.9	87241.7	30520.6	90852.8	99057.2	64775.4	49141	94113.2	87799.4	39160.5	47071.3	155644	109298
63311@[M+H]+@RANK1	Cycloeucalenol	469-39-6	C02141	C30H50O	426.386	Triterpenoids	427.4	83.1	+	11.9	5537.38	9199.51	11774.7	14433.3	7803.98	7224.25	5258.58	5283.58	17564.9	4034.14	7591.13	7798.8	5626.06	12375.5
71486@[M+H]+@RANK1	Lupenone	1617-70-5	C16990	C30H48O	424.371	Triterpenoids	425.4	95.1	+	10.83	11006.5	18576.8	110205	141650	118790	43966	41775.2	97301.1	17279.9	21636.7	10773	71615.8	92498.7	45877.3
88223@[M+H]+@RANK1	Cyclomusalenone	30452-60-9		C30H48O	424.371	Triterpenoids	425.4	83.1	+	9.42	2185.86	3434.26	6768.77	4927.32	3858.66	4472.32	5255.03	6806.61	3148.84	2587.78	3531.02	6432.74	2629.81	2266.45
90306@[M+H]+@RANK1	Taraxasterone	6786-16-9		C30H48O	424.371	Triterpenoids	425.4	407.4	+	13.85	12163.8	4953.55	9519.9	9346.82	5523.79	5929.65	8164.76	6865.3	11095.6	9472.38	9995.15	8270.68	9454.18	7279.81
43824@[M+H]+@RANK1	18alpha-Glycyrrhetinic acid	1449-05-4		C30H46O4	470.34	Triterpenoids	471.3	177.2	+	9.18	98657.4	151109	552544	636613	684486	350853	384441	474303	87753.6	115400	102810	629057	484106	375894
43857@[M+H]+@RANK1	Glycyrrhetinic acid	471-53-4		C30H46O4	470.34	Triterpenoids	471.3	189.2	+	9.23	37499.6	469928	1.6377e+06	1.56851e+06	2.00943e+06	198707	205155	216088	158155	93355.8	119299	1.93968e+06	849261	914224
90634@[M+H]+@RANK1	Ganoderic acid Jb	112430-68-9		C30H46O4	470.34	Triterpenoids	471.3	407.3	+	9.24	317378	314074	1.471e+06	1.40697e+06	1.59136e+06	248395	242818	318109	152808	93219.1	138404	1.43002e+06	1.17017e+06	220637
91113@[M+H]+@RANK1	3-Oxopomolic acid	13849-90-6		C30H46O4	470.34	Triterpenoids	471.3	407.3	+	12.26	3928.29	10241.1	11635.9	3126.55	7784.04		3094.89	4426	109075	1568.12	4055.81	9285.52	436949	9997.37
91712@[M+H]+@RANK1	11-Keto-beta-boswellic acid	17019-92-0		C30H46O4	470.34	Triterpenoids	471.3	453.3	+	9.24	431611	719398	2.53089e+06	1.95132e+06	3.23358e+06	566193	471221	525305	215901	217093	296303	3.29935e+06	2.28125e+06	274938
91173@[M+H]+@RANK1	Ganoderic acid F	98665-15-7		C32H42O9	570.283	Triterpenoids	571.3	553.3	+	12.97	22186.4	35896.7	84796.4	88544.4	68376.5	61688.3	49361.8	75128.4	44446.6	29799.5	88336	109569	60777.2	35649.2
43908@[M+H]+@RANK1	Pristimerin	1258-84-0	C08633	C30H40O4	464.293	Triterpenoids	465.3	201.1	+	6.85	9430.22	13877.9	19877.2	29670	27793.8	45686.1	9687.41	17716.3	16213	7893.94	11873.2	36666.7	68258.6	22335
44861@[M+H]+@RANK1	Crategolic acid	4373-41-5	C16939	C30H48O4	472.355	Triterpenoids	473.4	409.3	+	12.48	8561.65	14811		762.736	8384.78	4682	7506.69	4080	4681.16	9209.5	2183.5	4606	8659.45	5671.34
71426@[M+H]+@RANK1	Alphitolic acid	19533-92-7	C16912	C30H48O4	472.355	Triterpenoids	473.4	409.3	+	10.56	7536.83	9231.15	41452.9	29842	51255.9	15654.1	9982.49	23918.9	6420.92	9376.63	1816.5	16770.6	15663.1	3096.61
71704@[M+H-H2O]+@RANK1	Alisol A	19885-10-0	C17459	C30H50O5	490.366	Triterpenoids	473.4	383.3	+	7.27	2376.53	1057.25	4763.96	2859.86	7219.55	3216.79	3417.09	5055.18	2642.9	4134.52	1067.19	3734.68	9816.17	8842.23
89100@[M+H]+@RANK1	Lucidumol A	217476-73-8		C30H48O4	472.355	Triterpenoids	473.4	437.3	+	10.55	47102.6	46482.5	116387	115469	149712	114196	103010	214397	18107	31308	28789.9	74157.1	121189	97912.3
91172@[M+H]+@RANK1	Ganoderic acid H	98665-19-1		C32H44O9	572.299	Triterpenoids	573.3	555.3	+	11.73	18849.2	32424.6	36098.7	80247.6	94022.1	94799.8	55596.2	83970.2	60132	38661.5	28468.6	52685.9	43675.1	52768.6
44385@[M+H]+@RANK1	alpha-Hederin	27013-91-8	C08954	C41H66O12	750.455	Triterpenoids	751.5	437.3	+	8.16	2624.59	4764.84	6953.38	8478.25	8254.32	8544.96	9907.44	8330.14	35916.2	48607.9	45577.9	4612.6	11218.2	5645.32
67197@[M+H]+@RANK1	Salannin	992-20-1	C08780	C34H44O9	596.299	Triterpenoids	597.3	147.1	+	5.97	4375.14	13384.7	12005.3	21386.7	12039.6	65361.4	4725.18	30603.5	7626.24	9495	3150.83	3938.67	7652.01	19286
67081@[M+H]+@RANK1	Dipterocarpol	471-69-2	C08622	C30H50O2	442.381	Triterpenoids	443.4	425.4	+	12.05	13479.3	27203.3	9134.5	8851.1	13382.8	19680.6	24307.1	14774.5	33116.2	17609.8	9004.32	40808.2	36037.3	22472.3
63310@[M+H]+@RANK1	24-Methylenecycloartan-3-ol	1449-09-8	C08830	C31H52O	440.402	Triterpenoids	441.4	83.1	+	11.45	4075.87	7003.35	14048.4	6088.76	16921.4	18912.1	6610.22	10144		16975.2	15468	17540.9	24391.6	8006.14
90617@[M+H]+@RANK1	Ganoderol B	104700-96-1		C30H48O2	440.365	Triterpenoids	441.4	405.4	+	11.21	4424	13645.3	4075	8591.99	5464.84	13678.8	4630.51	9271.68	6945.41	2617.17	8228	8128.66	2684	3285.01
88915@[M+H]+@RANK1	Ganoderic acid D2	97653-94-6		C30H42O8	530.288	Triterpenoids	531.3	467.3	+	12.6	1972	18969.5		9256.5	2650		6720.02	1987	6048.76	4091				2003
67196@[M+H]+@RANK1	Rutaevin	33237-37-5	C08779	C26H30O9	486.189	Triterpenoids	487.2	469.2	+	12.58	10533	16346	31754.4	25973	20608.9	12073.3	19799.7	39291.1	33083.1	31010.7	17347.5	28110.8	50066.6	57177.2
67206@[M+H]+@RANK1	Bryodulcosigenin	4965-97-3	C08789	C30H50O4	474.371	Triterpenoids	475.4	439.4	+	9.94	3452.99	1685.43	2991.52	6410.57	8430.38	8629.51	8816.57	6211.34	442.716	3547.1	1462.22	11718.7	6817.77	7023.27
67292@[M+NA]+@RANK1	Ginsenoside Re	52286-59-6	C08944	C48H82O18	946.55	Triterpenoids	969.5	789.5	+	7.47	1101.53	56851.4	4992.26	5134.56	6297.94	7796.75	2362.98	70620	2679.86	1437.97	46079.2	8861.3	14787.6	3467.22
67293@[M+H]+@RANK1	Ginsenoside Rf	52286-58-5	C08945	C42H72O14	800.492	Triterpenoids	801.5	765.5	+	9.01		4431.42	2608.2	2312.73	4545.58	2220.75	5245.88	2237.13	876.708		2191.14	10063.6	3583.44	5732.75
67294@[M+H]+@RANK1	Ginsenoside Rg1	22427-39-0	C08946	C42H72O14	800.492	Triterpenoids	801.5	621.4	+	7.9	6425.74	7722.43	52916.2	55854.1	24777.9	89283.6	106413	19004.6	4775.2	48144.2	62868	19295.2	30536.3	52661.9
67299@[M+H]+@RANK1	Cauloside A	17184-21-3	C08953	C35H56O8	604.398	Triterpenoids	605.4	455.4	+	7.4	6003.23	64316.9	10832.7	270676	32624.6	11497.4	318442	27963.6	4038.1	2718.83	4021.11	21959.3	316599	15081.3
67317@[M+H]+@RANK1	Quillaic acid	631-01-6	C08972	C30H46O5	486.335	Triterpenoids	487.3	451.3	+	12.94	431.408	4069.63	2639.34	5158.58	6174.89	4601.25	7055.95	2641.7	3262.61	1821.52	2835.01	3021.9	8663.47	3687.35
70897@[M+H]+@RANK1	Asiaticoside	16830-15-2	C15428	C48H78O19	958.514	Triterpenoids	959.5	471.3	+	8.11	4724.67	907.889	10513.4	11620.9	11132	6165.11	9543.15	8054.16	1794.77	1456.04	3448.02	16494	28265.3	7048.78
71578@[M+H]+@RANK1	Epifriedelanol	16844-71-6	C17123	C30H52O	428.402	Triterpenoids	429.4	411.4	+	12.29	60195.3	56520.9	68129.8	23280.1	41672.6	111586	54779.1	84540.3	52760	31223.4	105570	43931.6	189775	126225
71771@[M+H]+@RANK1	Ginsenoside Ro	34367-04-9	C17543	C48H76O19	956.498	Triterpenoids	957.5	777.4	+	9.58	4264.32	2774.25	19415.9	19113.2	11969.3	10370.1	19807	20710.4	3401.38	3493.85	1130.54	12190.3	20572.8	5453.43
90984@[M+H]+@RANK1	Ganoderol A	104700-97-2		C30H46O2	438.35	Triterpenoids	439.4	421.3	+	11.31	47133.1	47280.3	174088	236210	237919	130270	95220	62685.6	51934.8	16270.4	94589.7	167575	104413	114788
91017@[M+H]+@RANK1	Ginsenoside Rd	52705-93-8	C20725	C48H82O18	946.55	Triterpenoids	947.6	767.5	+	10.08	737.727	2015.43	9738.93	7074.58	9542.55	6627.65	7762.73	7338.76	4357.14	769.888	762.278	4928.99	1046.07	5482.43
91093@[M+H]+@RANK1	Ganoderic acid S	104759-35-5		C30H44O3	452.329	Triterpenoids	453.3	391.3	+	9.21	20227.4	43801.2	149719	135247	189611	111782	140641	21416.1	24285.5	15401.1	28612.3	197136	131794	62184.2
91169@[M+H]+@RANK1	Ganoderal A	104700-98-3		C30H44O2	436.334	Triterpenoids	437.3	419.3	+	8.09	72083.5	155791	468478	636537	678833	381699	342250	259184	113783	62985.2	48709.9	468529	425998	689000
91247@[M+H]+@RANK1	Limonexic acid	99026-99-0		C26H30O10	502.184	Triterpenoids	503.2	485.2	+	12.55	26278.2	71580.6	23417.5	72234.4	60952.1	126445	76165.2	77223.9	82606	110296	43472.6	26010.5	120508	30738.9
92637@[M+H]+@RANK1	Glycyrrhetic acid 3-O-mono-beta-D-glucuronide	34096-83-8		C36H54O10	646.372	Triterpenoids	647.4	453.3	+	14.03	1180.35	2570.75	2293.81	4084.77	1104.01	1345.74	1927.36	2117.71	2263.01	1918.7	1998.75	875.516	3562.93	815.01
92898@[M+H]+@RANK1	Jangomolide	93767-25-0		C26H28O8	468.178	Triterpenoids	469.2	451.2	+	13.79	6365.96	10001	10826.8	8029.75	15420.2	6186.03	15771	8356.25	11008.1	12652.5	8926.53	8509.52	9138.52	9571
94114@[M+H]+@RANK1	Ginsenoside F1	53963-43-2		C36H62O9	638.439	Triterpenoids	639.4	603.4	+	9.11		9072.32	13743.3	8390.13	11258.3	4246.4	2753.16	6898.98	2604.66	1825.09	1589.99	12466.9	15216.6	1803.61
53784@[M+H]+@RANK1_91039@[M+H]+@RANK1	Taraxerol;Pseudotaraxasterol	127-22-0;464-98-2	C08637	C30H50O	426.386	Triterpenoids	427.4	409.4	+	12.71	54097.2	53505.4	87241.7	53690.4	82628.1	66695.2	177837	116107	31471	77311.2	28048	96276.3	155644	100905
53782@[M+H]+@RANK1_70103@[M+H]+@RANK1	Glycyrrhetinic acid;Eburicoic acid	1449-05-4;471-53-4;560-66-7	C02283;C14495	C30H46O4;C31H50O3	470.34	Triterpenoids	471.35	407.35	+	10.57	53783.8	102560	377650	468106	314939	201813	145411	226112	45755.1	28722.9	46006.6	358880	166967	99847.6
71659@[M+H]+@RANK1_71678@[M+H]+@RANK1	Karounidiol;Soyasapogenol C	118117-31-0;595-14-2	C17394;C17422	C30H48O2	440.365	Triterpenoids	441.4	405.4	+	10.55	572.427	13645.3	9563.53	15636.6	14735.9	15648.7	5496	3785.88	4619.24	1762.67	1749	11474.6	4712.66	2934.75
67290@[M+H]+@RANK1_90445@[M+H]+@RANK1_91000@[M+H]+@RANK1	Echinocystic acid;Pomolic acid;Sebiferenic acid	510-30-5;13849-91-7;94390-09-7	C08942	C30H48O4	472.355	Triterpenoids	473.4	409.3	+	12.27	8561.65	14811	23628.8	762.736	789.21	4682	781.385	4643.51	798.201	3262.52	2183.5	5451.05	8659.45	3896.61
71705@[M+H]+@RANK1_93359@[M+H]+@RANK1_95966@[M+H]+@RANK1	Alisol B;Macrocarpal B;Macrocarpal H	18649-93-9;142698-60-0;179388-53-5	C17460	C30H48O4;C28H40O6	472.355	Triterpenoids;Sesquiterpenoids	473.333	455.333	+	10.56	19110.2	10940.5	34233.3	45777.2	140978	93860.9	31301.3	105338	43349.1	12903.7	26555.9	65866.4	76361.4	91942.6
41161@[M+H]+@RANK1	Cornin	548-37-8	C09802	C17H24O10	388.137	Iridoids	389.1	209.1	+	11.91	4366.9	14345.4	10527.3	25418.7	6559.82	5538.54		4364.52	5603.87		10100.1	12342.3	9646.41
67933@[M+H]+@RANK1	Geniposide	24512-63-8	C09781	C17H24O10	388.137	Iridoids	389.1	209.1	+	5.14	7132	9332.94	13563.3	10942.9	33670.9	13794.6	12618.1	28688.1	12623.2	5859.62	9429.78	22775.8	9636.97	14022.1
69144@[M+H]+@RANK1	Lamiide	27856-54-8	C11644	C17H26O12	422.142	Iridoids	423.1	243.1	+	10.74	3006.12	6994	8446.08	9738.38	6479.35	8042.6	23096.5	19602.6	2449.38	20130.1	4388.37	13806.1	9249.54	11012.2
71492@[M+H]+@RANK1	Morroniside	25406-64-8	C17000	C17H26O11	406.148	Iridoids	407.2	227.1	+	4.49	1794.27	2636.02	5602.17	8263.53	7203.04	4219.84	9803.28	9959.2	15731.3	1929.22	6770.35	10551.2	14287.7	12134.8
67924@[M+H]+@RANK1	Agnuside	11027-63-7	C09765	C22H26O11	466.148	Iridoids	467.2	121	+	12.37	24054.8	25614.7	50767.3	49524.4	34025	29780.2	51434.5	40157.3	39478.1	44209.2	82108.4	66374.9	44375.3	37796.4
67721@[M+H]+@RANK1	Ipecoside	15401-60-2	C09464	C27H35NO12	565.216	Iridoids	566.2	548.2	+	12.7	12363.5	19823.9	10599.5	7748.44	15398	16957.6	23746.1	14931.8	10798.6	16521.8	9697.34	34025.9	40937.8	17444.9
64052@[M+H]+@RANK1	Geniposidic acid_Geniposidic acid	27741-01-1	C11673	C16H22O10	374.121	Iridoids;Terpene	375.1	339.1	+	3.7	3075.76	6536.53	6854.53	7602.07	5820.11	3622.57	8108.14	5880.57	2667.31	2423.6	4297.76	5255.89	4199.02	2094.38
64938@[M+H-H2O]+@RANK1	Loganin	18524-94-2	C01433	C17H26O10	390.153	Terpene	373.1	179.1	+	5.1	1163.25	8415.33	12910.9	7170.12	2961.76	10640.3	4135.24	6536.43	23784.5	1751.5	3542	2372.74	1779.5	590.742
67454@[M+H]+@RANK1_92059@[M+H]+@RANK1	Mascaroside;Secoisolariciresinol monoglucoside	55465-97-9;63320-67-2	C09132	C26H36O11	524.226	Naphthofurans;Lignans	525.2	489.2	+	7.9	4331.85	4347.29	10359.9	5247.89	11289.4	8954.28	6261.62	9051.85	4940.94	534.24	7188.71	13262.1	21813.5	7590.72
44022@[M+H]+@RANK1	Osthol	484-12-8	C09280	C15H16O3	244.11	Phenylpropanoids	245.1	189.1	+	12.08	26021.1	29827.6	9138.83	43286.6	40284.4	21293.8	13299.9	11230.2	22172.7	17900.3	20893.5	25206.8	16274.6	14138.9
71724@[M+H]+@RANK1	Isofraxidin	486-21-5	C17480	C11H10O5	222.053	Phenylpropanoids	223.1	205.1	+	4.25	6777.97	18582.6	6844.03	5804.31	7263.28	4804.56	13459.6	5947.36	13091.8	4254.12	2704.83	4377.22	10037.3	4912.08
95343@[M+H]+@RANK1	3,4,5-Trimethoxycinnamyl alcohol	30273-62-2		C12H16O4	224.105	Phenylpropanoids	225.1	207.1	+	10.4	22311.5	7789.54	28366.3	22531.8	6280.62	20734.3	35836.8	21287.5	19973.6	17009.7	7769.68	23193.7	18321.8	9815.26
4153@[M+H]+@RANK1	Hydrocinnamic acid	501-52-0	C05629	C9H10O2	150.068	Phenylpropanoids	151.1	45	+	11.25	15250.7	4434.98	4875.73	10369.1	12007.2	8108.95	9831.88	9389.5	5248.71	9346.84	14879.1	6958.28	25814.5	32462
6971@[M+H]+@RANK1	p-Coumaryl alcohol	3690-05-09	C02646	C9H10O2	150.068	Phenylpropanoids	151.1	133.1	+	4.15	2532.17	6345.79	3655.73	2557.53	9616.95	4268.77	2854.9	3038.98	2466.88	3942.01	5502.29	7236.15	7108.81	6171.08
64172@[M+H]+@RANK1	5-O-Caffeoylshikimic acid	73263-62-4	C10434	C16H16O8	336.085	Phenylpropanoids	337.1	121	+	9.95	5575.83	4776.71	5612.86	5668.48	18396.2	18058.6	16343	8044.13	3517.29	6487.45	2843.6	8860.97	20511.7	5640.62
64175@[M+H]+@RANK1	Scopolin	531-44-2	C01527	C16H18O9	354.095	Phenylpropanoids	355.1	193.1	+	9.99	2964.62	3246.26	7052.48	6167.74	4027.43	2487.85	2469	6081.6	2747.71	1644.31	2016.26	6276.12	3317.74	2814.07
66385@[M+H]+@RANK1	Methyl cinnamate	103-26-4	C06358	C10H10O2	162.068	Phenylpropanoids	163.1	103.1	+	4.9	26113.5	15867.9	33019.1	28828.4	16596.7	53191.7	40089	47671.2	94060.5	179591	167329	32682.8	18554.2	29397.3
65764@[M+H]+@RANK1	Cinnamyl alcohol	104-54-1	C02394	C9H10O	134.073	Phenylpropanoids	135.1	117.1	+	10.56	4645.28	16867.8	6521.76	17305.4	4737.93	4409.33	11359	4817.1	4675	5573.04	8034.24	8551.87	6457.75	6743.3
4156@[M+H]+@RANK1	Ferulic acid_ Trans-Ferulic acid;trans-Ferulic acid	1135-24-6;537-98-4	C01494	C10H10O4	194.058	Phenylpropanoids	195.1	117	+	4.86	182535	176406	486574	543293	689669	432209	404009	394586	21874	11333.7	14319.3	812899	898234	957411
64178@[M+H]+@RANK1	5-Hydroxyconiferaldehyde	249647-14-1	C12204	C10H10O4	194.058	Phenylpropanoids	195.1	177.1	+	4.61	9521.98	12313.8	5982.06	14621.9	13599.1	7786.14	9320.54	9934.14	11578.9	8958.66	8488.66	6002.65	9430.18	10842.8
64942@[M+H]+@RANK1	3-Hydroxy-4-methoxycinnamic acid_Isoferulic acid	537-73-5	C10470	C10H10O4	194.058	Phenylpropanoids	195.1	149.1	+	4.87	56457.1	47938.6	161501	129797	184600	124266	123834	131677	9155.05	5655.75	12698	211685	307042	256196
3316@[M+H]+@RANK1	Caffeic acid	331-39-5	C01481	C9H8O4	180.042	Phenylpropanoids	181	163	+	4.44	4696.37	3189.22	2363.55	2611.87	9161.62	3778.84	4282.49	8496.27	2529.35	3453.42	2680.54	2727.89	7132.93	2376.68
90607@[M+H]+@RANK1	3-Methoxy-4,5-methylenedioxycinnamaldehyde	74683-19-5		C11H10O4	206.058	Phenylpropanoids	207.1	189.1	+	5.04	8011.4	21509.8	20766.4	7007.5	23675	12300.8	12605.9	9199.45	20049.8	20287.5	14159	15434.9	23611.2	11137
88554@[M+H]+@RANK1	3-(4-Hydroxyphenyl)-1-propanol	10210-17-0		C9H12O2	152.084	Phenylpropanoids	153.1	135.1	+	3.09	5238.56	6462.39	10207.4	10542.4	5379.22	6286.64	2571.36	7488.8	5721.57	10105.4	7352.9	4678.39	5841.4	7283.81
64181@[M+H]+@RANK1	Syringin	118-34-3	C01533	C17H24O9	372.142	Phenylpropanoids	373.1	193.1	+	4.61		3733.15	3815.75	10861.8	3390.92	7673.43	3541.99	8157.19	2170.69	3163.08	3659.13	10086	4528.97	7957.04
95700@[M+H]+@RANK1	C-Veratroylglycol	168293-10-5		C10H12O5	212.068	Phenylpropanoids	213.1	123	+	3.47	9745.59	5638.24	9533.49	14037.4	19816	8138.42	9219.36	8413.44	5662.2	13335.4	26071.6	9178.01	6341.59	7252.45
68331@[M+H]+@RANK1	Dihydroconiferyl alcohol	2305-13-7	C10448	C10H14O3	182.094	Phenylpropanoids	183.1	165.1	+	7.99	6094.3	4224.88	1788.49	4548.08	7749.61	6748.34	5620.79	7793.77	4060.86	4312.79	2874.32	10685.7	2008.21	10671.2
71523@[M+H]+@RANK1	Phillyrin_Phillyroside	487-41-2	C17048	C27H34O11	534.21	Phenylpropanoids	535.2	373.2	+	7.76	7723.02	17123.1	33049.5	19585.8	34799.3	13911.4	11846.6	16126.3	16512.9	18934.7	21717	16111.3	25559.3	27425.1
67393@[M+H]+@RANK1	Angelicin	523-50-2	C09060	C11H6O3	186.032	Phenylpropanoids	187	131	+	8.97	6065.63	27141.2	56903.7	13633.3	6035.26	3663.89	4877.62	17581.5	2069.65	2310.71	925.848	8717.09	8591.88	10446.2
89559@[M+H]+@RANK1	Cinnamyl cinnamate	122-69-0		C18H16O2	264.115	Phenylpropanoids	265.1	117.1	+	4.26	325154	378283	2.50315e+06	2.5959e+06	3.08936e+06	170141	206382	185526	52149	37665.2	66245.6	835301	848018	809342
90604@[M+H]+@RANK1	Octadecyl p-coumarate	72943-88-5		C27H44O3	416.329	Phenylpropanoids	417.3	105	+	12.07	7190.67	9058.22	15317.2	9718	8979.24	15101.8	12035	10436.5	9511.7	8081.24	11424.4	7926.75	7100.79	15560.7
64950@[M+H]+@RANK1	3-Hydroxypicolinic acid	874-24-8	C18620	C6H5NO3	139.027	Pyridines and derivatives	140	94	+	4.15	3118.09	4042.87	2811.79	1517.28	2612.84	1122.94	1903.33	1089.28	2497.01	2216.77	2733.54	1782.37	2455.49	1530.69
274@[M+H]+@RANK1	3-Carbamyl-1-methylpyridinium (1-Methylnicotinamide)	3106-60-3	C02918	C7H8N2O	136.064	Pyridines and derivatives	137.1	94.1	+	6.36	6488.06	7962.33	12378.4	12032.2	11068.5	7797.33	11042.1	11105.7	18273.1	20084.4	24408.9	6851.82	5162.71	11915.4
1501@[M+H]+@RANK1	N1-Methyl-2-pyridone-5-carboxamide	701-44-0	C05842	C7H8N2O2	152.059	Pyridines and derivatives	153.1	108	+	2.63	1783.95	4848.26	3676.88		8270.36	11887.3	5382.76	4643.13			2155.09	3786.76	4102.99	3227.12
1502@[M+H]+@RANK1	N1-Methyl-4-pyridone-3-carboxamide	769-49-3	C05843	C7H8N2O2	152.059	Pyridines and derivatives	153.1	136	+	2.66	13997.7	26631.6	28153.7	38618.7	57807.6	79121.5	53027.1	48876	5377.5		8208.03	51802.8	60294	48482.4
68002@[M+H]+@RANK1	(S)-Actinidine	524-03-8	C09910	C10H13N	147.105	Pyridines and derivatives	148.1	132.1	+	2.8	5129.17	3393.2	8974.28	3088.3	3190.93	2813.68	3671.16	6025.65	4127.68	3718	3808.56	3734.06	6138.66	4121.03
236@[M+H]+@RANK1	Pyridoxamine 5'-phosphate	529-96-4	C00647	C8H13N2O5P	248.056	Pyridines and derivatives	249.1	134.1	+	3.51	793.37	3668.83	2563.03	1232.86	1713.64	1610.71	1991.03	2171.4	3380.9	2156.67	1682.27	2689.76	1164.44	1504.01
849@[M+H]+@RANK1	Isonicotinic acid	55-22-1	C07446	C6H5NO2	123.032	Pyridines and derivatives	124	53	+	2.3	3540.28	3805.95	4568.44	2417.78	2279.11	4727.54	2156.75	7686.2	2152.65	3449.94	5290.96	3539.71	3272.69	3277.32
73241@[M+H]+@RANK1	5-(3-Pyridyl)-2-hydroxytetrahydrofuran	53798-73-5	C19578	C9H11NO2	165.079	Pyridines and derivatives	166.1	104	+	2.8	9046.34	7868.65	31747.5	18503.6	24988.3	29197.5	26064.6	24597.4	5591.9	6098.32	8824.81	28267.6	27836.4	22514.4
3327@[M+H]+@RANK1	3-Dehydroquinate	10534-44-8	C00944	C7H10O6	190.048	Alcohols and polyols	191.1	145.1	+	10.56	13795.2	13362.2	28609.4	15475.9	9135.3	13293.3	11935.1	9880.58	15729	12587	16360.3	6613.87	24561	19892
66219@[M+H]+@RANK1	Toluene-cis-dihydrodiol	41977-20-2	C04592	C7H10O2	126.068	polyol	127.1	39	+	1.78	5941.67	2325.32	7073.12	4493.02	12178.9	4201.64	6877.16	9913.24	7133.13	2549.32	4533.64	10941.2	9205.75	19231.7
3318@[M+H]+@RANK1	Phosphorylcholine	107-73-3	C00588	C5H14NO4P	183.066	Cholines	184.1	86.1	+	0.67	1.13041e+06	1.12092e+06	2.29027e+06	1.71841e+06	1.68267e+06	1.60667e+06	1.70824e+06	1.69068e+06	1.36767e+06	1.3007e+06	1.62843e+06	1.7652e+06	2.0472e+06	2.34099e+06
370@[M+H]+@RANK1	Glycerophosphocholine	28319-77-9	C00670	C8H20NO6P	257.103	Cholines	258.1	104.1	+	1.47	5770.84	6790.45	10129.3	24148.4	17474.5	6587.77	7476.41	3690.13	12564.1	8302.64	15788	13633.5	22133.3	12154.4
65502@[M+H]+@RANK1	O-Phosphocholine	3616-04-4_107-73-3	C00588	C4H12NO4P	169.05	Cholines	170.1	74.1	+	14.27	370.609	603.991	252.768	828.796	1128.93	828.371	371.823	337.144	592.292	706.2	372.79	472.964	445.665	426.409
41039@[M+H]+@RANK1	Aloeemodin	481-72-1	C10294	C15H10O5	270.053	Anthraquinones	271.1	253.1	+	8.79	6906.42	3454.72	4308.67	4979.33	7439.01	5864.34	4866.03	3166.21	4701.46	4414.43	3465.69	2395.17	2919.48	1193.28
68282@[M+H]+@RANK1	Lucidin	478-08-0	C10369	C15H10O5	270.053	Anthraquinones	271.1	253.1	+	8.89	6833.99	3633.87	8403.48	4979.33	8747.86	5864.34	4866.03	1165.98	571.966	4414.43	3465.69	2395.17	2919.48	4367
71850@[M+H]+@RANK1	Aurantio-obtusin	67979-25-3	C17670	C17H14O7	330.074	Anthraquinones	331.1	313.1	+	10.28	8289.5	16252.9	8301.1	6335.83	11561	14350.3	13732.5	6173.5	11039.6	6811.09	9173.79	10083.3	12764.1	14075.9
41043@[M+H]+@RANK1	Chrysophanol_Chrysophanic acid; Chrysophanol	481-74-3	C10315	C15H10O4	254.058	Anthraquinones	255.1	152.1	+	7.46	1698.89	4360.6	1575.13	1503.25	1216.7	484.913	3095.69	1480.06	1880.41	3589.71	1736.7	2460.39	865.664	2068.91
43813@[M+H]+@RANK1	Anthraquinone	84-65-1	C16207	C14H8O2	208.052	Anthraquinones	209.1	105	+	8.08	4533.14	4690.45	10743.3	7529.37	8965.28	8299.73	6234.88	15903.2	5384.23	5494.46	5783.32	8311.8	13109.6	6185.83
44061@[M+H]+@RANK1	Juglone	481-39-0	C03840	C10H6O3	174.032	Quinones	175	147	+	8.74	16424.1	5671.13	14356	11104.6	15307.9	11527.3	11288.6	6819.02	11891	7085.72	17834	3976.6	5509	5863.51
68247@[M+H]+@RANK1	Deoxylapachol	3568-90-9	C10325	C15H14O2	226.099	Quinones	227.1	55.1	+	4.93	3259.37	5316.19	9622.63	7298.74	3691.34	7052	3650.63	7685.64	7316.4	9666.12	8545.82	8754.96	8764.69	5876.19
68305@[M+H]+@RANK1	Rapanone	573-40-0	C10399	C19H30O4	322.214	Quinones	323.2	43.1	+	12.82	5290.21	2358.37	5725	5752.22	6335.1	8832.78	3424.27	7273.83	9497.32	3659.76	6290.98	6865.18	11406.6	7579.89
228@[M+H]+@RANK1	Vitamin K1	84-80-0	C02059	C31H46O2	450.35	Quinones	451.4	187.1	+	13.44	4390.25	50239.5	21651.7	6474.79	44389.7	63749.2	58279	42896.1	15518.7	61735.1	6809.33	55697.4	55027.2	17616.4
64009@[M+H]+@RANK1	Shikonin	517-89-5	C17412	C16H16O5	288.1	Quinones	289.1	271.1	+	12.04	39066.9	50068.3	27787.1	9632	22571.7	29126.9	57548.8	12219.9	30616.6	13739.6	11553.3	14953	20032.2	23367.9
87074@[M+H]+@RANK1	Shikonin	517-88-4	C10292	C16H16O5	288.1	Quinones	289.1	271.1	+	5.14	10196.6	6042.87	4147.74	6140.79	2734.74	4614.57	6527.26	5456	4919.93	1759.33	7289	4843.27	1190.93	5894.69
63616@[M+H]+@RANK1	Phenylacetonitrile	140-29-4	C16074	C8H7N	117.058	Benzene and substituted derivatives	118.1	101	+	3.76	1362.67	3397.35	1596.24	3577.82	1403.63	920.95	3431.24	4682.35	1312.95	2066.71	2080.1	4000.99	1117.57	1297.18
71253@[M+H]+@RANK1	5-Phenyl-1,3-oxazinane-2,4-dione		C16596	C10H9NO3	191.058	Benzene and substituted derivatives	192.1	103.1	+	2.8	4480.89	3222.18	5333.95	4209.74	4200.38	2634.69	6497.86	2834.98	5028.71	4792.9	6087.36	3994.61	3320.12	2791.48
44613@[M+H]+@RANK1	2-(Methylamino)benzoic acid	119-68-6	C03005	C8H9NO2	151.063	Benzene and substituted derivatives	152.1	134.1	+	1.58	3490.33	2391.72	2815.84	6651.22	3068.25	9928.48	1664.15	2518.23	1517.62	3596.13	5739.8	3201.32	6232.55	7986.53
3260@[M+H]+@RANK1	2-Phenylacetamide	103-81-1	C02505	C8H9NO	135.068	Benzene and substituted derivatives	136.1	119	+	2.52	46858.6	20658.3	15381.9	95255.5	85407.8	31088.6	25921.4	24301.8	16126.2	16740.7	14504.4	19846.4	24229.9	24009.1
6107@[M+H]+@RANK1	N-Acetylarylamine	103-84-4	C07565	C8H9NO	135.068	Benzene and substituted derivatives	136.1	94.1	+	1.93	107357	120327	434789	523273	462228	117907	113911	81643.4	53065	44632.6	15252.3	273149	195980	184360
66654@[M+H]+@RANK1	Eprosartan	133040-01-4	C07467	C23H24N2O4S	424.146	Benzene and substituted derivatives	425.2	333.1	+	12.07	23267.8	21163.1	14281.9	21350.1	37285.4	58559.7	43629.3	37880.5	98042.2	108563	126168	24630.1	22465.2	16199.6
71249@[M+H]+@RANK1	Atropaldehyde	4432-63-7	C16592	C9H8O	132.058	Benzene and substituted derivatives	133.1	103.1	+	6.34	8005.91	7607.11	23333	15910.5	20702.3	13869.9	21123.8	24558.5	13406.5	19718	20200.8	14823.2	14834.9	10571.2
58595@[M+H]+@RANK1	2-Hydroxy-3-(4-hydroxyphenyl)propenoic acid	10589-28-3；52178-61-7	C05350	C9H8O4	180.042	Benzene and substituted derivatives	181	105	+	10.05	7051.59	9838.74	13021	10652	5467.24	6216.73	8311.12	5062.81	7934.44	8352.76	10130	5910.05	7493.55	8190.79
972@[M+H]+@RANK1	3,4-Dihydroxyphenylacetaldehyde	5707-55-1	C04043	C8H8O3	152.047	Benzene and substituted derivatives	153.1	135	+	4.05	3572.14	3557.7	4566.92	3878.49	5252.75	1411.3	2530.71	2239.94	4982.37	5293.77	4232.41	3941.64	6753.85	5014.01
70134@[M+H]+@RANK1	1,2,4-Trimethylbenzene	95-63-6	C14533	C9H12	120.094	Benzene and substituted derivatives	121.1	105.1	+	5.71	19208.4	18390.8	43067	33536.5	7504.11	45501.8	43615.2	23516	18210.8	21443.2	30460.5	40353.8	20448.1	26762
62906@[M+H]+@RANK1	Phenethylamine	64-04-0	C05332	C8H11N	121.089	Benzene and substituted derivatives	122.1	105.1	+	2.82	27401	21151.5	32804.6	43778.4	48988.7	43247.9	52631.5	26859.2	9725.31	14123.6	12371.7	51174.4	40762.1	44729.4
999@[M+H]+@RANK1	2,6-Dimethylaniline	87-62-7	C11004	C8H11N	121.089	Benzene and substituted derivatives	122.1	105.1	+	2.02	3288.45	3846.81	3440.65	3561.74	2991.48	3750.81	3960.6	1629.69	3910.15	4485.68	2366.65	3647.36	2736.93	6238.51
2541@[M+H]+@RANK1	Ephedrine	299-42-3	C01575	C10H15NO	165.115	Benzene and substituted derivatives	166.1	148.1	+	5.07	4933.95	1808.83	6067.38	1836.83	6152.39	1206.96	3016.44	1194.6	616.216	8763.83	1164.5	8644.61	1869	3624.01
3934@[M+H]+@RANK1	Benzocaine	1994-09-07	C07527	C9H11NO2	165.079	Benzene and substituted derivatives	166.1	120	+	3.05	1.05945e+07	1.11994e+07	2.83905e+07	2.6873e+07	2.92137e+07	2.88452e+07	2.96056e+07	2.6362e+07	4.96041e+06	5.01681e+06	5.40985e+06	2.62172e+07	3.40693e+07	3.24547e+07
41092@[M+H]+@RANK1_44707@[M+H]+@RANK1	1,2-Epoxy-p-menth-8-ene;Ortho-Hydroxyphenylacetic acid	1195-92-2;614-75-5	C07271;C05852	C10H16O;C8H8O3	152.12	Oxepanes;Benzene and substituted derivatives	153.1	107.05	+	5.91	21996.7	11248.3	29267.6	13746.3	6302.67	11424.1	7758.74	12308.9	9830.04	18054.2	9204.99	18720.4	15093.6	30979.7
63506@[M+H]+@RANK1_68507@[M+H]+@RANK1	4-Hydroxyphenylacetaldehyde;4'-Hydroxyacetophenone	7339-87-9;99-93-4	C03765;C10700	C8H8O2	136.052	Benzene and substituted derivatives;Phenols	137.1	119	+	10.57	60029.5	45199.1	21115.3	25580.6	49145.1	33660.6	25948.5	37286.3	47090.8	20748.5	38733.3	38891	14027.6	37827.7
2982@[M+H-H2O]+@RANK1	Ursodeoxycholic acid	128-13-2	C07880	C24H40O4	392.293	Steroids	375.3	357.3	+	11.47	25480.4	19902.7	37000.2	16583.5	31217.2	23401.8	42923.9	40319	37560.7	22158.6	27295.5	38952.8	45958.4	17437
58133@[M+H]+@RANK1	Guggulsterone E&Z	95975-55-6		C22H30O3	342.219	Steroids	343.2	325.2	+	11.08	5929.52	7032.93	4444.54	6351.04	9072.13	8942.15	3219.81	10537.5	6930.63	8814.57	15454.8	12634.5	4551.68	4283.04
402@[M+H]+@RANK1	Progesterone	57-83-0	C00410	C21H30O2	314.225	Steroids	315.2	97.1	+	11.6	5397.47	9394.36				13189.1	11276	13400.3	14550.4	5879.18	9594.31	12108.3	5258.58	7194.76
71435@[M+H]+@RANK1	Bufotaline	471-95-4	C16923	C26H36O6	444.251	Steroids	445.3	385.2	+	11.9	1603.8	10683.8	7823.21	806.026	7925.41	9900.26	12007.1	4917	6361.46	6442.14	4912.77	6504.13	7344.18	8792.64
89700@[M+H]+@RANK1	22-Dehydroclerosterol	26315-07-1		C29H46O	410.355	Steroids	411.4	93.1	+	12.59	312247	392004	595158	848970	1.08739e+06	927148	554800	582192	460995	397220	891498	983815	919587	484018
57758@[M+H]+@RANK1	Sarsasapogenin	126-19-2	C03963	C27H44O3	416.329	Steroids	417.3	273.2	+	12.08	11775.5		6535.7	3199.52		4834		4123.32	3613.95	11149.5	7204.87	7363.14		5929.15
84987@[M-H]-@RANK1	Oleaside A	69686-84-6		C30H44O7	516.309	Steroids and steroid derivatives	515.3	93	-	0.74	28912.4	30111.4	81007.2	72364.8	91351.4	39797.1	37616.8	38412.2	22670.3	24239.5	38098.6	79696.1	76258	107414
2789@[M+H]+@RANK1	Dihydrotestosterone	521-18-6	C03917	C19H30O2	290.225	Steroids and steroid derivatives	291.2	273.2	+	5.08	11189.5	1820.5	3010.6	583.582	4207.57	589.577	2948.09	5172.98	1234.28	1785	4259.23	2352.08	1238.29	1850.5
41844@[M+H]+@RANK1	Epiandrosterone	481-29-8	C07635	C19H30O2	290.225	Steroids and steroid derivatives	291.2	273.2	+	5.17	11189.5	2341.41	3551.67	583.582	4207.57	589.577	2948.09	3860.87	4891.28	2346.75	590.575	2352.08	1238.29	1850.5
41826@[M+H]+@RANK1	17alpha-Estradiol	57-91-0	C02537	C18H24O2	272.178	Steroids and steroid derivatives	273.2	255.2	+	10.95	19940.7	8653.19	9917.06	10641	14485.8	10105.9	11085.3	7564	22687	7948.55	6449.04	9429.85	4534.19	28797.8
44235@[M+H]+@RANK1	17-Hydroxyprogesterone	3168-01-2_68-96-2	C01176	C21H30O3	330.219	Steroids and steroid derivatives	331.2	97.1	+	11.77	41622.1	54136.9	252031	164420	188512	405889	247181	323627	113393	181711	108047	219462	114623	119171
5089@[M+H]+@RANK1	Deoxycorticosterone	64-85-7	C03205	C21H30O3	330.219	Steroids and steroid derivatives	331.2	97.1	+	9.61	30882.7	26331.7	56783.1	65331.5	48311.3	174664	205920	245779	108447	85604	110082	57980.3	86060	74871.6
89525@[M+H]+@RANK1	Physalin A	23027-91-0		C28H30O10	526.184	Steroids and steroid derivatives	527.2	509.2	+	12.1	28237.8	19720	58250.8	37547.1	44296.8	25827.8	30469.9	44418.9	15120.3	16669.1	13592.3	26912.1	39321.8	17375.9
89860@[M+H]+@RANK1	Physalin G	76045-38-0		C28H30O10	526.184	Steroids and steroid derivatives	527.2	509.2	+	12.17	29719.4	19720	27684.7	31466.7	44296.8	25827.8	30469.9	44418.9	15120.3	12540.2	13592.3	26912.1	17276.9	32840
41800@[M+H]+@RANK1	Bufalin	465-21-4	C16922	C24H34O4	386.246	Steroids and steroid derivatives	387.3	107.1	+	5.05	7006.15	6020.47	13037.6	6736.61	9606.05	12579.6	9810.06	7569.61	28382.2	31060.1	15233.6	15309.1	29059.6	12228.3
41883@[M+H]+@RANK1	Allopregnanolone	516-54-1	C13712	C21H34O2	318.256	Steroids and steroid derivatives	319.3	301.3	+	11.58	7227.71	13035.4	11961.7	17620.1	12725.5	9158.75	25787.9	6909.71	10861.8	5666.4	7378.87	11049.3	11180	18752.9
1434@[M+H]+@RANK1	Nandrolone	434-22-0	C07254	C18H26O2	274.193	Steroids and steroid derivatives	275.2	257.2	+	10.58	3428	6316.41	5791.25	4683.91	7349.7	4432.44	3630.73	9392.8	1785.5	5855.24	5275	6981.37	10967.8	2993.1
67219@[M+H]+@RANK1	Withaferin A	5119-48-2	C08841	C28H38O6	470.267	Steroids and steroid derivatives	471.3	281.2	+	10.57	25376	11497.3	135289	127384	107900	88138.7	114914	118977	29247.1	27569.9	17529.8	97967.5	117945	57039.5
977@[M+H]+@RANK1	Levonorgestrel	797-63-7	C08149	C21H28O2	312.209	Steroids and steroid derivatives	313.2	91.1	+	11.29	26682.2	4452.82	125744	106947	131609	12407.7	84729.8	97239.6	10288.9	5478.34	13965.2	213569	66405.7	8592
163@[M+H-H2O]+@RANK1	Cholesterol	57-88-5	C00187	C27H46O	386.355	Steroids and steroid derivatives	369.4	147.1	+	11.86	51830	86397.3	91244.3	118927	72871.3	213197	181593	209547	50514.4	67655.6	62098.5	240022	109638	125990
166@[M+H-H2O]+@RANK1	Lathosterol	80-99-9	C01189	C27H46O	386.355	Steroids and steroid derivatives	369.4	95.1	+	11.8	79728.8	139868	369902	469183	285925	329701	407758	475261	137684	105085	90370	741689	231399	244697
167@[M+H-H2O]+@RANK1	Campesterol	474-62-4	C01789	C28H48O	400.371	Steroids and steroid derivatives	383.4	147.1	+	12.18	123661	79762.2	143038	195557	226759	243879	283394	239939	234470	189470	168244	161562	254145	213910
168@[M+H-H2O]+@RANK1	Stigmasterol	83-48-7	C05442	C29H48O	412.371	Steroids and steroid derivatives	395.4	83.1	+	13.12	198765	221863	260841	249999	186144	149808	204609	171062	153480	219179	8159.22	116967	222376	8550.66
41771@[M+H-H2O]+@RANK1	alpha-Spinasterol	481-18-5	C08840	C29H48O	412.371	Steroids and steroid derivatives	395.4	83.1	+	13.32	168160	221863	260841	249999	186144	149808	107317	156124	190706	193834	135634	116967	222376	137244
66838@[M+H]+@RANK1	Exemestane	107868-30-4	C08162	C20H24O2	296.178	Steroids and steroid derivatives	297.2	121.1	+	11.61	29372.7	38120.2	54511.3	68871.5	60404.2	58877.7	95431.5	94013.5	30617.8	68573.2	51184.7	77396.5	63241.4	66140.6
92736@[M+H]+@RANK1	Ergosterol peroxide	2061-64-5		C28H44O3	428.329	Steroids and steroid derivatives	429.3	85.1	+	13.49	3230.27	42181.4	18203.3	54295.3	88503.8	18920.3	5945.52	89341.6	63230.6	51864.9	5547.94	22611.9	13898.6	4701.43
44529@[M+H]+@RANK1	Boldione	897-06-3	C20144	C19H24O2	284.178	Steroids and steroid derivatives	285.2	121.1	+	9.07	9383.05	8267.95	7211.28	7112.48	4414.58	4894.59	7594.05	7291.58	3971.71	3182.99	4796.33	5505.22	8898.21	3514.28
43200@[M+H]+@RANK1	Adrenosterone	382-45-6	C05285	C19H24O3	300.173	Steroids and steroid derivatives	301.2	121.1	+	9.32	3651.95	5914.07	6135.64	6921.14	12219.7	7981.92	12205.9	3342.39	4372.71	2345.04	5417.97	9495.95	5977.68	4332.78
67251@[M+H]+@RANK1_67256@[M+H]+@RANK1	Deltonin;Gracillin	55659-75-1;19083-00-2	C08894;C08901	C45H72O17	884.477	Steroids and steroid derivatives	885.5	723.4	+	7.13	1070.16	4127.74	4978.14	5808.66	6100.65	1983.6	4284.69	3412.79	2649.43	275.481	1678.81	8054.05	5323.49	11591.6
89925@[M+H]+@RANK1_94067@[M+H]+@RANK1	7-Oxo-beta-sitosterol;6beta-Hydroxystigmast-4-en-3-one	2034-74-4;36450-02-9		C29H48O2	428.365	Steroids and steroid derivatives	429.4	411.4	+	13.54	16337.9	17282.3	14086.6	17809.6	28320.8	41205.6	28415	24624.8	26734.9	26743.7	11228.9	19732.7	52993	17924.2
89861@[M+H]+@RANK1_93687@[M+H]+@RANK1	Physalin L;Physalin O	113146-74-0;120849-18-5		C28H32O10	528.2	Steroids and steroid derivatives	529.2	511.2	+	12.39	39998.5	57038.3	86248.8	48358.2	99631.9	117776	85977.3	59112.3	40403.1	42013.2	91715.2	61987.9	84208.1	64307.3
72157@[M+H]+@RANK1	N-p-Coumaroyl putrescine	34136-53-3	C18326	C13H18N2O2	234.137	Phenolamides	235.1	72.1	+	4.16	4128.1	3609.92	5102.73	2565.25	4070.75	6741.69	2395.71	3904.73	5337.51	4169.19	7603.7	4280.99	1696.5	3696.04
72156@[M+H]+@RANK1	N-Feruloyl agmatine		C18325	C15H22N4O3	306.169	Phenolamides	307.2	60.1	+	4.91	517512	712998	3.4583e+06	2.94363e+06	2.6368e+06	96745.4	113662	110153	15979	1173.04	13540.5	584796	425825	528448
68364@[M+H]+@RANK1	N-Feruloyl putrescine	501-13-3	C10497	C14H20N2O3	264.147	Phenolamides	265.2	72.1	+	4.33	75934.6	93978.3	459195	389550	444443	76107.3	86313.7	65795.1	70787.9	34980.6	41685.6	179484	208083	155294
44833@[M-H]-@RANK1	Delta-Tocotrienol	25612-59-3	C14156	C27H40O2	396.303	Phenols	395.3	135	-	11.5	3782.42	1730.58		2929.55	1431.55	2311.95			2897.65	2058.04	1143.74	2441.16	4846.73	939.037
66508@[M+H]+@RANK1	3-Ethyl-1,2-benzenediol	933-99-3	C06728	C8H10O2	138.068	Phenols	139.1	79.1	+	0.74	128609	120044	290682	274505	320775	68443.8	93165.9	84331.5	93319	78269.6	120841	179327	122390	109554
88219@[M+H]+@RANK1	1,2-Dimethoxybenzene	91-16-7		C8H10O2	138.068	Phenols	139.1	51	+	0.76	18247.6	12076.9	23165.7	32234.7	32511.6	31503.1	29176.6	11488.2	23952.1	25268.3	17296.3	17754.7	29235.6	16102.4
7029@[M+H]+@RANK1	Piceatannol	10083-24-6	C05901	C14H12O4	244.074	Phenols	245.1	107	+	10.49	1713.67	6121.79	2987.97	2348.08	6742.37	5587	4687.25	4654.25	4024.48	2346.75	5251.47	6155.45	2961.43	5281.5
87107@[M+H]+@RANK1	Batatasin III	56684-87-8		C15H16O3	244.11	Phenols	245.1	107	+	8.73	5193.97	3416.33	4047.16	4901.09	9552.73	5951.95	4686.07	4126.58	3513.67	2318.75	4931.01	7637.46	2953.65	6848.16
87212@[M+H]+@RANK1	Demethoxyencecalin	19013-07-1		C13H14O2	202.099	Phenols	203.1	119	+	11.8	13170	49027.5	34704.6	20441.2	47521.7	94170.8	63550.4	79486.1	47449.3	85684.9	40389.5	75769.3	59054.7	104828
58313@[M+H]+@RANK1	6-Gingerol_ 6-Gingerol;[6]-Gingerol;Gingerol	58253-27-3;23513-14-6	C10462	C17H26O4	294.183	Phenols	295.2	151.1	+	11.99	298482	341763	987710	841219	1.30839e+06	843210	1.23275e+06	1.13215e+06	137299	164005	147455	1.93699e+06	1.19668e+06	770511
73578@[M+H]+@RANK1	Acetic acid m-cresyl ester	122-46-3		C9H10O2	150.068	Phenols	151.1	109.1	+	7.28	5675.25	3830.18	4524.49	5131.84	6946.41	1791.68	3193.54	5164.26	3627.48	3935.03	5625.33	2457.21	6775.41	4108.13
128@[M+H]+@RANK1	Phenol	108-95-2	C00146	C6H6O	94.0419	Phenols	95	77	+	2.09	99121.1	14672.6	28920.9	30833.7	511542	24625	14272.7	21791.7	95811.9	37480	13032.4	37428	9015.86	14123.5
94834@[M+H]+@RANK1	Moracin O	123702-97-6		C19H18O5	326.115	Phenols	327.1	239.1	+	9.52	2789.01	5223.19	27960.9	3212.7	24022.9	7001.09	20245.9	7074.86	783.771	2654.82	3068.95	30718	14530.4	12108.3
1297@[M+H]+@RANK1	Benzoic acid	65-85-0	C00180	C7H6O2	122.037	Phenols	123	77	+	5.95	21489.4	23990.7	40155.8	51461.8	28690.7	50004.8	30038.9	47995	42264.2	42758.1	19128.8	23130.5	34013.8	42284
62451@[M+H]+@RANK1	4-Hydroxybenzaldehyde	123-08-0	C00633	C7H6O2	122.037	Phenols	123	77	+	1.91	1.52423e+06	1.67307e+06	4.29077e+06	5.12633e+06	8.22977e+06	1.52106e+06	1.32302e+06	1.56955e+06	913617	542426	770252	1.89693e+06	3.97919e+06	3.78443e+06
66591@[M+H]+@RANK1	1-Phenylethanol	98-85-1	C07112	C8H10O	122.073	Phenols	123.1	105.1	+	10.56	4092.08	3497	4783.27	1193.31	3618	5493		2936.92		3812.04	7827.31	6251.45	3552.5	1162.91
70020@[M+H]+@RANK1	3-Ethylphenol	620-17-7	C14386	C8H10O	122.073	Phenols	123.1	79.1	+	10.56	34240	68462	35767	39277.4	43795.2	22511.5	31240.6	38968.5	35160.4	41358.2	35768.3	42499.6	28953	36205.4
70177@[M+H]+@RANK1	2,4-Dimethylphenol	105-67-9	C14582	C8H10O	122.073	Phenols	123.1	65	+	10.56	6350.41	8109.24	10381.8	9803.39	8185.63	8232.75	11051.3	6762.85	7813.34	13914.5	8726.63	6417.55	3823.38	2936.42
41033@[M+H]+@RANK1	Cannabinol	521-35-7	C07580	C21H26O2	310.193	Phenols	311.2	91.1	+	11.75	20265.2	43858.7	47345.9	89101.9	96054.5	37235	67037.4	76624	15130	14796.3	29095.8	48573.2	29869.2	35167.3
89164@[M+H]+@RANK1	Moracin C	69120-06-5		C19H18O4	310.121	Phenols	311.1	55.1	+	13.99	443841	418953	339007	389345	460832	348392	475689	239501	407817	345064	355264	461894	489537	463555
41032@[M+H]+@RANK1	Cannabidiol	13956-29-1	C07578	C21H30O2	314.225	Phenols	315.2	193.1	+	11.75	9523.17	5210.04	1641.49				9650.15	9004.14	10140.3	2245.19	1598.8	2450.5	11199.8
71442@[M+H]+@RANK1	Chavicol	501-92-8	C16930	C9H10O	134.073	Phenols	135.1	107	+	10.57	30621.7	39566.9	34009.5	31775.1	28456.5	31260.2	25930.7	47776.1	57353	34240.1	31825.4	41902.8	25175.4	31952.9
44726@[M+H]+@RANK1	Methyl gallate	99-24-1		C8H8O5	184.037	Phenols	185	125	+	4.44	1627.58	4210.82	1728.5	1648.63	1781.37	1050.07	887.726	2051.29	3087.52	2157.58	2443.28	1183.98	2480.94	747.022
89218@[M+H]+@RANK1	Octyl Gallate	1034-01-1		C15H22O5	282.147	Phenols	283.2	153	+	12.97	127765	168940	193012	221972	232849	186091	188822	175852	189030	125850	180533	213916	204376	207332
67345@[M+H]+@RANK1	Encecalin	20628-09-5	C09005	C14H16O3	232.11	Phenols	233.1	177.1	+	10.56	55515	21994.3	24226.7	31612.1	25493.1	19922.2	29125.7	35708.9	17800.6	15220	49541.3	34555.9	8231.65	22010
95611@[M+H]+@RANK1	Koaburaside monomethyl ether	41514-64-1		C15H22O9	346.126	Phenols	347.1	185.1	+	11.65	9872.99	4807.81	6356.22	14140.6	7272.01	11293.1	8807.72	20562.7	23626.4	9834.15	4986.39	15492.1		19213.1
65@[M+H]+@RANK1	Metanephrine	5001-33-2	C05588	C10H15NO3	197.105	Phenols	198.1	180.1	+	2.13	1588.01	3126.6	3389.65	3582	3063.64	4804.1	3198.84	2678.98	3434.31	2961.36	2609.76	2583.26	2326.63	2754.61
4236@[M+H]+@RANK1	p-Cresol	106-44-5	C01468	C7H8O	108.058	Phenols	109.1	94	+	7.28	5630.33	8572.09	4172.81	10073.7	7675.28	7095.35	5209.46	8004.09	8072.25	10709.4	16348.8	7884.74	13702.8	4255.9
697@[M+H-H2O]+@RANK1	4-Hydroxy-3-methoxymandelate_Vanillylmandelic acid	1955-10-07	C05584	C9H10O5	198.053	Phenols	181.1	65	+	3.27	3696.4	5196.16	9079.21	3162.85	11389.5	6448.15	6707.61	5059.09	4907.96	3221	8276.15	3613.48	3540.49	4133.98
88535@[M+H]+@RANK1	Propyl paraben	94-13-3		C10H12O3	180.079	Phenols	181.1	43.1	+	3.26	4201.52	7715.21	11016.8	8995.61	10360.1	3123.08	6702.1	9307.5	4708.09	5360.73	6399.6	10761.7	7770.2	6601.86
67775@[M+H]+@RANK1	Broussonin C	76045-49-3	C09524	C20H24O3	312.173	Phenols	313.2	55.1	+	13.23	19781.1	157620	116716	180731	167713	81374.2	146878	174108	110218	65949.6	101596	142324	194218	238984
68217@[M+H]+@RANK1	4'-Prenyloxyresveratrol	69065-16-3	C10283	C19H20O4	312.136	Phenols	313.1	55.1	+	11.85	229325	242225	807271	742528	646265	691642	597863	809481	88231	66760.6	127520	1.15293e+06	480142	354130
44039@[M+H]+@RANK1	DL-alpha-Tocopherylacetate	7695-91-2	C13202	C31H52O3	472.392	Phenols	473.4	207.1	+	13.37	3720.05	2481.69	4916.98	2707.34	3739.3	4699.14	2719.59	4798.61	3292.75	4705.24	7374.16	2869.02	1369.47	1442.97
4150@[M+H]+@RANK1	3-Hydroxyphenylacetic acid	621-37-4	C05593	C8H8O3	152.047	Phenols	153.1	107	+	5.06	23106.5	7785.2	17081.2	16159.5	9922.81	16444.7	14706.4	9365.86	9447.28	13779.8	13730.9	9205	13692.7	14535.2
94498@[M+H]+@RANK1	4-(Ethoxymethyl)phenol	57726-26-8		C9H12O2	152.084	Phenols	153.1	107	+	2.63	32249.3	49692.6	17399.2	20155.1	23530.1	41455.1	20720.3	22970.4	54786.7	41389	34975.6	24671.2	29561.4	21829.3
62927@[M+H]+@RANK1	Vanillin	121-33-5	C00755	C8H8O3	152.047	Phenols	153.1	65	+	5.9	13529.2	46484.6	44678.3	55180	29980.8	36630.2	40689.2	39052.9	28011.4	25901	18796	15827.1	27200.9	31423
69425@[M+H]+@RANK1	Methyl salicylate_Methyl 2-hydroxybenzoate	119-36-8	C12305	C8H8O3	152.047	Phenols	153.1	65	+	9.82	19588	7899.38	12815.9	19377.9	13122.9	7533.18	10113.5	17996.1	7075.04	6936.34	7155.48	15722.3	8867.39	12176.6
53235@[M+H]+@RANK1	Astringin	29884-49-9	C10245	C20H22O9	406.126	Phenols	407.1	245.1	+	11.6	7192.2		9371.2		4864.31	10397.3	5603.98	13515.3	10712.6	10327.5	8904.94	13734		4971.76
58358@[M+H]+@RANK1	Benzaldehyde	100-52-7	C00261	C7H6O	106.042	Phenols	107	79	+	2.82	90809.6	89634	227592	167088	192495	190909	176680	216767	74780.8	71267.7	50783.7	227873	182161	190552
93288@[M+H]+@RANK1	Ethyl 3,4,5-trimethoxybenzoate	6178-44-5		C12H16O5	240.1	Phenols	241.1	195.1	+	0.53	6994.9	15590.3	17751.5	18476.2	10931.4	35702.1	34126.2	30497.9	42217.3	25185.6	41001.7	11646	15440.6	14063.6
67222@[M+H]+@RANK1	Mulberrofuran A	68978-04-1	C08846	C25H28O4	392.199	Phenols	393.2	55.1	+	13.23	11494.8	19527.3	24116.3	18634.4	21612	7432.51	10690.7	14360.7	13658.1	15254.2	17271.9	18868.8	9631.95	6273.28
5471@[M+H]+@RANK1	Vanillic acid	121-34-6	C06672	C8H8O4	168.042	Phenols	169	65	+	3.78	4416.1	5921.32	21579.8	11007.9	14629.2	6028.22	13062.9	14498.3	7353.9	8577.67	9474.57	13438.5	11634.6	9738.85
5785@[M+H]+@RANK1	p-Hydroxymandelic acid	1198-84-1	C11527	C8H8O4	168.042	Phenols	169	123	+	3.36	15350.3	25308.7	47118.2	33256.6	49975	20282	26838.5	37157.4	40874.9	18702.1	40551	42799.4	37314.7	45495.1
58200@[M+H]+@RANK1	3-Methoxy-4-hydroxyphenylglycolaldehyde	17592-23-3	C05583	C9H10O4	182.058	Phenols	183.1	123	+	7.99	4240.08	1681.72	4676.45	2040.35	3522.35	3799.79	6306.26	2412.72	5365.11	2792.32	4154.53	4249.71	3560.46	5360.13
61@[M+H]+@RANK1	p-Octopamine	104-14-3	C04227	C8H11NO2	153.079	Phenols	154.1	91.1	+	3.84	2.07513e+07	2.197e+07	2.05674e+07	1.96083e+07	2.09565e+07	2.04184e+07	2.36115e+07	2.22694e+07	2.31294e+07	2.39122e+07	2.25231e+07	1.81024e+07	1.85042e+07	2.14277e+07
45423@[M+H]+@RANK1	Pterostilbene	537-42-8	C10287	C16H16O3	256.11	Phenols	257.1	181.1	+	11.76	5921.35	18818.8	13839.1	7908.81	5799.39	9088.4	19055.7		3756.34	10251.1	6005.22	8978.65		7371.64
68016@[M+H]+@RANK1	Dihydromethysticin	19902-91-1	C09926	C15H16O5	276.1	Phenols	277.1	135	+	11.97	215109	276042	209791	150683	133130	333313	180748	243547	207840	68370.2	100853	168150	104282	146763
63625@[M+H]+@RANK1	Prunasin	99-18-3	C00844	C14H17NO6	295.106	Phenols	296.1	116	+	11.99	7971.59	9068.53	3731.91		3766.58	6331.46	5673.18		795.038
63629@[M+H]+@RANK1	Taxiphyllin	21401-21-8	C01855	C14H17NO7	311.101	Phenols	312.1	132	+	13.76	3461.28	3394.22	3490.7	4327.65	3451.36	4332.6	1262.33	2644.3	1798.23	3214.37	2535.53	2949.27	2214.37	2483.97
87907@[M+H]+@RANK1	alpha-Hexylcinnamaldehyde	101-86-0		C15H20O	216.151	Phenols	217.2	91.1	+	8.71	6697.69	14903.5	12759.6	14015.2	17524.2	4511.7	6126.89	8623.92	4493.53	6529.16	3649.96	4286.82	8110.73	11843.9
89151@[M+H]+@RANK1	7-(4-Hydroxyphenyl)-1-phenyl-4-hepten-3-one	100667-52-5		C19H20O2	280.146	Phenols	281.2	105.1	+	12.53	135842	173258	133532	216382	206737	311383	413985	175888	262657	159236	349679	279952	347310	292160
92372@[M+H]+@RANK1	Oleocanthal	289030-99-5		C17H20O5	304.131	Phenols	305.1	121.1	+	12.4	10627.2	38742.2	30952.8	17596.1	37357.2	45966.8	57811.4	27239.7	34804.1	16164.1	37179.8	65005.8	19357.8	26992.3
93199@[M+H]+@RANK1	5-Tricosyl-1,3-benzenediol	70110-60-0		C29H52O2	432.397	Phenols	433.4	123	+	13.85	3341.04	4225.41	2696.51	3448.94	4466.07	6131.73	4467.88	4175.55	8138.85	6487.39	5818.55	9732.09	7885.21	6183.63
53841@[M+H]+@RANK1	Beta-Tocotrienol	490-23-3	C14154	C28H42O2	410.318	Phenols	411.3	151.1	+	12.18	3961.45	6808.5	4359.41	53238	2502.33	9070.84	13136.8	8616.77	3167.87	7027.5	1605.14	2458	6125.61	8320.66
68062@[M+H]+@RANK1	Yangonin	500-62-9	C09980	C15H14O4	258.089	Phenols	259.1	161.1	+	12.12	16044.6	24824.7	32277.4	31306.2	14810.5	9824.78	28325.8	18172.3	10362.2	10034.6	14755.8	13976.3	27616	36612
68521@[M+H]+@RANK1	Paeonolide	72520-92-4	C10715	C20H28O12	460.158	Phenols	461.2	167.1	+	12.07	12199.9	11648.5	4904	35583.9	41767.5	2417	2446.5	3247.86	2824.27	804.362	797.369	5245.61		1617.05
71736@[M+H]+@RANK1	10-Gingerol	23513-15-7	C17496	C21H34O4	350.246	Phenols	351.3	151.1	+	12.44	15738.9	13383	14314.1	29523.7	37892.6	39999.7	27678.4	29098.9	41038.4	38078.5	45104.6	15511.6	27547.5	36918.3
58136@[M+H]+@RANK1	4-Nitrocatechol	3316-09-04	C02235	C6H5NO4	155.022	Phenols	156	110	+	1.24	104732	143568	199269	680928	89456.4	61559.4	89823.4	42807.9	166072	155898	199474	80838.3	396368	260955
89532@[M+H]+@RANK1	Hamamelitannin	469-32-9		C20H20O14	484.085	Phenols	485.1	153	+	12.29	800.698	91475.4	3289.53	39008.2			71887	66984.3	96655		85094.5			5173.12
91684@[M+H]+@RANK1	Mulberrofuran Q	101383-35-1		C34H24O10	592.137	Phenols	593.1	575.1	+	13.28	21300.8	89472.4	31783.5	56333.4	65968.8	63599	96325.4	51425.3	103167	62409.5	122682	46122	35328.3	22854.4
93160@[M+H]+@RANK1	Cassiaside B	119170-51-3		C26H30O14	566.164	Phenols	567.2	255.1	+	13.12	3240.58	4189.45	3745.63	7819.68	6157.96	12145.4	13009.4	4149.76	2438.68	7281.99	5781.87	13496.1	4714.24	9209.34
225@[M+H]+@RANK1	alpha-Tocopherol	1959-02-09	C02477	C29H50O2	430.381	Phenols	431.4	165.1	+	13.37	18726.6	198118	73481.8	151132	339050	107915	252659	219475	97125.5	189654	30976.5	54556.4	48025.9	94578.3
2256@[M+H]+@RANK1	Syringic acid	530-57-4	C10833	C9H10O5	198.053	Phenols	199.1	140	+	3.57	44152	54178.6	135740	109367	179007	174195	251018	175023	124519	98811.3	190036	107922	89290.9	109324
69422@[M+H]+@RANK1	Cinnamyl acetat	103-54-8	C12299	C11H12O2	176.084	Phenols	177.1	117.1	+	10.56	14471.8	28602.3	49815.5	26352.2	51957.1	21571.3	46826	22676.1	19172.3	10510.5	8467.8	35606.2	30514.6	54527.4
4148@[M+H]+@RANK1_63105@[M+H]+@RANK1_88534@[M+H]+@RANK1	Phloretic acid;3-(2-Hydroxyphenyl)propanoic acid;Ethylparaben	501-97-3;495-78-3;120-47-8	C01744;C01198	C9H10O3	166.063	Phenols;Phenylpropanoic acids	167.1	121.067	+	2.84	1.1279e+06	1.33904e+06	2.44343e+06	2.41063e+06	2.63702e+06	2.70023e+06	2.73922e+06	2.32569e+06	674801	527537	620386	2.44113e+06	3.04834e+06	3.09115e+06
86690@[M+H]+@RANK1_86985@[M+H]+@RANK1_87085@[M+H]+@RANK1	Neogrifolin;Grifolin;Ugaxanthone	23665-96-5;6903-07-7;13179-11-8		C22H32O2;C18H16O6	328.24	Phenols;Xanthones	329.167	55.1	+	13.8	3169.14	3696.95	3264.01	2743.4	2003.01	3484.1	5085.5	4107.4	3499.71	4891.56	2951.97	3873.78	1498.16	3702.42
3005@[M+H]+@RANK1	Venlafaxine	93413-69-5	C07187	C17H27NO2	277.204	Phenol ethers	278.2	58.1	+	13.73	3644.39	2201.87	1761.16	4602.24	2675.31	2760.82	3199.35	2417.66	3379.91	1328.78	4097.54	4677.33	1743.35	1987.09
101@[M+H]+@RANK1	Nicotinic acid adenine dinucleotide_NAD	53-84-9	C00003	C21H27N7O14P2	663.109	Nucleotide and its derivates	664.1	136.1	+	0.75		99834.8	313756	227657	284907	234425	444027	641009	191248	222359	155017	656802	426010	526301
283@[M+H]+@RANK1	Cytosine	71-30-7	C00380	C4H5N3O	111.043	Nucleotide and its derivates	112.1	95	+	0.63	26738.7	17066.6	64007.4	53182.2	42084.8	57847.1	46905.2	74700.9	15195.7	26757	28847.3	116579	97804.3	19052.9
90@[M+H]+@RANK1	Uridine	58-96-8	C00299	C9H12N2O6	244.07	Nucleotide and its derivates	245.1	113	+	2.47	15165.3	25038	12298.9	31781.8	33001.5	30396	19424.5	21484.1	31470.6	13154.8	4150.61	21639.1	18877.2	9997.64
315@[M+H]+@RANK1	Guanine	73-40-5	C00242	C5H5N5O	151.049	Nucleotide and its derivates	152.1	135	+	2.63	775312	15104.5	43086.1	2.06337e+06	2.05732e+06	2.05184e+06	2.30262e+06	2.20646e+06	11191.5	10329.9	11947.9	4.25753e+06	2.51624e+06	1.86699e+06
3375@[M+H]+@RANK1	Thymidine	50-89-5	C00214	C10H14N2O5	242.09	Nucleotide and its derivates	243.1	127	+	3.04	11355.9	13749.2	27542.6	32007.4	33524.5	24292.6	15908.3	17703.7	8555.86	6383.65	11782.7	35928.1	37095.5	36610.7
3376@[M+H]+@RANK1	Cytidine	65-46-3	C00475	C9H13N3O5	243.086	Nucleotide and its derivates	244.1	112.1	+	0.7	92139.9	151868	322910	316767	305993	172930	216895	201936	75738.8	73470.2	92094.6	459864	281558	228951
3382@[M+H]+@RANK1	Deoxyadenosine	958-09-8	C00559	C10H13N5O3	251.102	Nucleotide and its derivates	252.1	136.1	+	4.04	2101.87	2243.98	2609.05	3055.81	2565.04	2407.33	5443.23	1905.64	13187.3	2590.01	3771.82	2483.25	6241.3	4005.1
63895@[M+H]+@RANK1	5'-Deoxyadenosine	4754-39-6	C05198	C10H13N5O3	251.102	Nucleotide and its derivates	252.1	136.1	+	2.41	3116.3	6327.49	9983.13	10798.1	5557.98	8764.95	11988.7	3451.21	3862.96	4379.25	6652.74	16061.2	3612.83	9322.92
66970@[M+H]+@RANK1	Cordycepin	73-03-0	C08431	C10H13N5O3	251.102	Nucleotide and its derivates	252.1	136.1	+	2.35	5030.07	6327.49	9983.13	10798.1	11005.2	8764.95	11988.7	17393.9	3862.96	4379.25	5866.69	16061.2	9597.36	9322.92
3425@[M+H]+@RANK1	5'-S-Methyl-5'-thioadenosine	2457-80-9	C00170	C11H15N5O3S	297.09	Nucleotide and its derivates	298.1	136.1	+	3.99	22420.2	29009.7	120314	153033	138941	29527	32716.1	8314.43	196053	15300.1	24057.5	71782.1	68255.9	63998.4
258@[M+H]+@RANK1	Uracil	66-22-8	C00106	C4H4N2O2	112.027	Nucleotide and its derivates	113	70	+	1.91	83318.3	50940.7	163642	95991.9	90915.7	78712.2	116114	83138.7	26123.8	21592.9	28504.5	293213	69246.2	115041
34478@[M+H]+@RANK1	Adenosine 5'-monophosphate	61-19-8	C00020	C10H14N5O7P	347.063	Nucleotide and its derivates	348.1	136.1	+	1.38	590817	570545	1.61767e+06	2.00573e+06	1.2438e+06	1.37203e+06	1.25287e+06	1.23627e+06	1.12022e+06	952148	1.25977e+06	3.82789e+06	1.67524e+06	1.18258e+06
63401@[M+H]+@RANK1	Adenosine 3'-monophosphate	84-21-9	C01367	C10H14N5O7P	347.063	Nucleotide and its derivates	348.1	136.1	+	2.23	3939.25	18060.9	19617.4	43808.6	22075.2	22341.7	17746	14490.3	12312.5	13132.5	7127.7	24973.5	17889.9	10640.1
4167@[M+H]+@RANK1	beta-Nicotinamide mononucleotide	1094-61-7	C00455	C11H15N2O8P	334.057	Nucleotide and its derivates	335.1	123.1	+	0.73	107097	147933	263092	322646	298529	414526	456437	484534	200511	149514	228805	405016	474460	402181
3485@[M+H]+@RANK1	Guanosine 3',5'-cyclic monophosphate	7665-99-8	C00942	C10H12N5O7P	345.047	Nucleotide and its derivates	346.1	152.1	+	2.26	27303.6	28971.6	194871	195955	164651	14464.8	23465.7	19604.3	12012.6	16889.6	19592.9	85007.3	67146	63689.1
91@[M+H]+@RANK1	2'-Deoxyuridine_Deoxyuridine	951-78-0	C00526	C9H12N2O5	228.075	Nucleotide and its derivates	229.1	113	+	2.67	4867.14	9218.23	8108.95	15075.5	11577.6	5198.87	7614.67	20351.6	14747.9	7874.56	12161.5	7411.38	24051.7	6797.06
6193@[M+H]+@RANK1	Purine	120-73-0	C15587	C5H4N4	120.044	Nucleotide and its derivates	121.1	94	+	2.05	492592	6141.48	108612	92306.7	108175	372609	373705	464062	2.83404e+06	2.23191e+06	2.99709e+06	228922	367355	341901
87@[M+H]+@RANK1	Guanosine	118-00-3	C00387	C10H13N5O5	283.092	Nucleotide and its derivates	284.1	152.1	+	2.65	1.7168e+06	7741.01	3.76894e+06	4.78643e+06	4.88075e+06	5.58995e+06	4.87367e+06	13985.6	28044.9	8594.57	19386.9	7.73396e+06	5.25632e+06	3.39426e+06
62374@[M+H]+@RANK1	1-Methyladenine	5142-22-3	C02216	C6H7N5	149.07	Nucleotide and its derivates	150.1	94	+	1.31	83367.6	94583.9	268967	233029	290619	144016	142381	190289	103429	107690	147379	173187	218026	174804
3598@[M-H]-@RANK1_3599@[M-H]-@RANK1	Uridine 5'-diphospho-D-glucose;UDP-D-galactose;Uridine diphosphategalactose	133-89-1;2956-16-3	C00029;C00052	C15H24N2O17P2	566.055	Nucleotide and its derivates;Pyrimidine nucleotides	565	323	-	0.71	3.71653e+06	3.6181e+06	6.59038e+06	3.97494e+06	5.80874e+06	1.12459e+07	1.24264e+07	7.93461e+06	6.09345e+06	4.64739e+06	9.16323e+06	1.0999e+07	1.08684e+07	5.5953e+06
61979@[M+H]+@RANK1	N1-(alpha-D-ribosyl)-5,6-dimethyl-benzimidazole	132-13-8	C05775	C14H18N2O4	278.127	Benzimidazole ribonucleosides and ribonucleotides	279.1	147.1	+	11.88	43012.2	80325.8	106823	91777.4	152657	120073	125254	162564	59002.5	52563.3	82746.5	120579	92412.9	123771
3474@[M+H]+@RANK1	AICAR	3031-94-5	C04677	C9H15N4O8P	338.063	Imidazole ribonucleosides and ribonucleotides	339.1	110	+	13.28	1.44397e+06	1.55074e+06	2.14047e+06	1.80861e+06	1.52972e+06	1.40775e+06	1.53248e+06	2.14106e+06	1.68261e+06	1.99443e+06	1.43029e+06	1.76955e+06	1.71049e+06	696801
599@[M+H]+@RANK1	Levamisole	14769-73-4	C07070	C11H12N2S	204.072	Imidazothiazoles	205.1	91.1	+	12.04	50937.3	40905.8	68091.9	77162.7	93278.2	52629.9	81017.5	53574.4	40319.6	48606.9	64304.5	41290.7	64753.7	64205
565@[M+H]+@RANK1	Gemcitabine	95058-81-4	C07650	C9H11F2N3O4	263.072	Pyrimidine nucleosides	264.1	112.1	+	0.75	18027.9	14312.9	16451.7	13565.6	18030.2	9590.76	23225.1	15759.9	22666.5	13041.3	15400.3	13358.3	14374.6	24694.2
58109@[M+H]+@RANK1	5-Methyldeoxycytidine	838-07-3	C03592	C10H15N3O4	241.106	Pyrimidine nucleosides	242.1	126.1	+	0.54	5011.73	10748.7	8294.78	13109.2	10086.5	10938.3	10719.3	12547.6	11789.5	11406.4	12744.4	11986	10162	14246.1
4140@[M+H]+@RANK1	dUMP	964-26-1	C00365	C9H13N2O8P	308.041	Pyrimidine nucleotides	309	113	+	0.76	19722.4	13602.8	6683.08	11994.4	16740	18992.8	21021.4	7499.23	21759.6	23120.6	37412	18634.8	20551	10842
3020@[M+H]+@RANK1	Vidarabine	5536-17-4_24356-66-9	C07195	C10H13N5O4	267.097	Purine nucleosides	268.1	136.1	+	2.28	191465	184918	542033	726362	481089	148875	173710	172174	52951.2	51505.8	61582.7	1.62448e+06	433884	281770
58235@[M+H]+@RANK1	2'-O-Methyladenosine	2140-79-6	C04779	C11H15N5O4	281.112	Purine nucleosides	282.1	136.1	+	2.72	14093.6	13357.1	43955.4	58690.7	69898	14314.1	14190.1	16952.7	7376.99	6104.05	16944	36667.6	30143.9	34754.4
69076@[M+H]+@RANK1	9-Riburonosyladenine	553592	C11501	C10H11N5O5	281.076	Purine Nucleosides	282.1	136.1	+	12.54	8305.67	10340.5	5946	11366.2	25726.9	12734	18770.4	21190.2	22534.8	17392.7	20102	22618.3	14090.2	7850
3459@[M+H]+@RANK1	Adenosine 2',3'-cyclic phosphate	634-01-5	C02353	C10H12N5O6P	329.053	Purine nucleotides	330.1	136.1	+	1.86	4644.23	7906.08	9513.5	18157	3586.54	1718.55	1525.04	1449.65	2410.82	561.73	3011.1	17213.6	19247.3	10899.8
3689@[M+H]+@RANK1	Dephospho-CoA	3633-59-8	C00882	C21H35N7O13P2S	687.149	Purine nucleotides	688.2	261.1	+	6.85	3726.73	5041.28	16517.1	6360.77	9229.35	32609.6	10665.1	15213.4	3349.39	4139.64	5020.5	16358.3	15201	16578.1
52314@[M+H]+@RANK1	2',6'-Dihydroxy 4'-methoxydihydrochalcone	35241-55-5	C09644	C16H16O4	272.105	Chalcones	273.1	105.1	+	10.72	2380.96	8834.63	25061.9	11137.8	21748.7	13776.9	6411.75	10904.8	7545.5	5406.93	11751.5	18147	13084.8	6249.75
87060@[M+H]+@RANK1	Hydroxysafflor yellow A	78281-02-4		C27H32O16	612.169	Chalcones	613.2	595.2	+	12.59	1.21712e+06	1.57668e+06	1.93895e+06	1.75303e+06	1.60175e+06	2.29465e+06	5.60357e+06	3.97505e+06	1.76079e+06	3.10831e+06	2.03321e+06	3.2776e+06	1.36819e+06	1.32506e+06
64209@[M+H]+@RANK1	Desmethylxanthohumol	115063-39-3	C16416	C20H20O5	340.131	Chalcones	341.1	119	+	13.01	26110.6	43547.4	45110.2	17809.2	40070.1	18615.6	47804.1	47987.8	40822.9	32361.1	54894.9	28894.6	45965.2	30036.9
86325@[M+H]+@RANK1	Safflor Yellow A	85532-77-0		C27H30O15	594.158	Chalcones	595.2	577.2	+	12.34	18596.2	57639	12446.3	17813.2	110696	57536.4	31783.4	54693	69516.8	84547.4	68297	61485.5	26786.5	29507.9
43793@[M+H]+@RANK1	Brazilin	474-07-7	C09920	C16H14O5	286.084	Flavonoids	287.1	121	+	6.2	2744.28	5838.57	5099.04	3978.24	2795.77	4765.98	3947.84	7285.46	3994.13	3899.07	8992.39	3443.86	4682.65	5815.85
49585@[M+H]+@RANK1	Scutellarein	529-53-3	C10184	C15H10O6	286.048	Flavonoids	287.1	269	+	8.12	5784.2	1838.07	8763.93	7496.86	6673.58	2152.9	7628.79	6712.39	3903.18	4175.32	3359.11	6644.89	6686.73	8615.45
71904@[M+H]+@RANK1	Demethoxycapillarisin	61854-36-2	C17786	C15H10O6	286.048	Flavonoids	287.1	269	+	6.51	5925	3234.02	3879	978.75	3268.62	4262.36	458.055	4810.48	2726.05	3616.84	3661.81	4161.1	1129.55	10184.9
48270@[M+H]+@RANK1	(-)-Sativan	41743-86-6	C10526	C17H18O4	286.121	Flavonoids	287.1	123	+	7.89	20164.9	2159.85	5139.89	4030.22	13674.9	4732.14	11891.6	3564.65	2147.55	1997.28	4134.5	7493.54	1633.91	4650.25
53048@[M+H]+@RANK1	Sakuranetin	2957-21-3	C09833	C16H14O5	286.084	Flavonoids	287.1	105	+	9.94	12637.4	17904.8	38197.3	40646.7	37974.5	27444.5	18348.9	32561.3	5468.28	3864.6	6206.07	54430.1	17098.2	22599.2
44509@[M+H]+@RANK1	Maltol	118-71-8	C11918	C6H6O3	126.032	Flavonoids	127	43	+	0.9	775599	926572	1.07585e+06	995883	883193	1.06109e+06	1.20714e+06	1.13031e+06	762783	989925	739384	1.34351e+06	1.75202e+06	1.18403e+06
43635@[M+H]+@RANK1	2,3-Dihydro-2-phenyl-4H-benzopyran-4-one	487-26-3	C02099	C15H12O2	224.084	Flavonoids	225.1	121	+	4.93	5459.76	7973.4	27137.6	19617.6	20220.7	8952.03	11049.4	19993.8	22241.2	7420.43	3345.37	13738.5	12769.8	5473.59
44865@[M+H]+@RANK1	4',7-Isoflavandiol	531-95-3	C14131	C15H14O3	242.094	Flavonoids	243.1	123	+	11.35	6198.72	18161	24425.8	15318.5	24453.4	9449.66	15750.1	12404.8	15395.5	11786.5	10198.1	10321.2	15923.2	5651.74
3397@[M+H]+@RANK1	Apigenin	520-36-5	C01477	C15H10O5	270.053	Flavonoids	271.1	153	+	9.06	4920.25	4293.76	4916.81	7197.47	13777.9	6171.48	4596.4	8683.54	7121.13	6097.36	8326.17	6547.48	6436.27	1673.23
45739@[M+H]+@RANK1	Galangin	548-83-4	C10044	C15H10O5	270.053	Flavonoids	271.1	153	+	11.08	2964.76	10338.2	1841.5	5506.83	8697.29	4491.32	6510	9734.05	16997.8	14115.8	5588	8265.83	2277.51	5667.36
3399@[M+H]+@RANK1	Pelargonidin	7690-51-9_134-04-3	C05904	C15H10O5	270.053	Flavonoids	271.1	121	+	8.98	8757.56	9978.14	4562.62	7756.81	5333.2	6754.85	7217.14	11576	4570.42	7222.54	4080.21	3463.55	7403.41	8738.82
49971@[M+H]+@RANK1	Resokaempferol	2034-65-3	C10037	C15H10O5	270.053	Flavonoids	271.1	105	+	8.79	3851.73	9555.9	8297.94	11122.9	11264	3482.34	10521.8	2908.24	2783.29	3182.09	10854.9	6661.69	9629.86	8732.77
49753@[M+H]+@RANK1	Norwogonin	4443-09-08	C10113	C15H10O5	270.053	Flavonoids	271.1	145	+	11.83	28906.2	22267.1	25359.5	13170.9	17900.6	20088.5	31329.1	15171.2	26818.2	18827	27846.6	29806.3	18388.6	21581.4
64203@[M+H]+@RANK1	Pinobanksin	548-82-3	C09826	C15H12O5	272.068	Flavonoids	273.1	91.1	+	8.14	4094.14	3198.5	9077.2	14731.5	4169.83	10532.9	6017.38	5407.25	11213.4	4729.22	7541.38	8647.27	7031.24	5634.1
64206@[M+H]+@RANK1	Garbanzol	1226-22-8	C09751	C15H12O5	272.068	Flavonoids	273.1	107	+	9.9	7788.02	6887	13677.2	26382.3	16703.3	18703.3	19251.3	19970.4	6290.91	4361.8	13218.1	21489.9	25924.7	12466.8
409@[M+H]+@RANK1	Quercetin	117-39-5	C00389	C15H10O7	302.043	Flavonoids	303	153	+	8.07	3628.02	2928.41	4634.92	9503.36	3641.41	2915.89	2365.6	3202.53	1714.26	2030.76	1815.13	6878.52	5465.18	2382.25
49995@[M+H]+@RANK1	Robinetin	490-31-3	C10177	C15H10O7	302.043	Flavonoids	303	137	+	6.83	2665.04	4062.56	4965.63	10678.5	7641.51	5254.74	11139.6	4650.79	13110.3	5333.35	10368.7	7691.73	4361.88	2426.93
49595@[M+H]+@RANK1	4',5,7-Trimethoxyflavone	6938-19-8	C14985	C18H16O6	328.095	Flavonoids	329.1	107	+	13.87	4881.21	8286.02	5299.23	7286.63	18587.7	12470.5	5736.92	8168.48	8711.05	7400.81	6878.02	7976.47	6679.99	7945
47700@[M+H]+@RANK1	Wighteone	51225-30-0	C10542	C20H18O5	338.115	Flavonoids	339.1	55.1	+	13.01	4.52516e+06	5.08083e+06	6.456e+06	5.46163e+06	4.55735e+06	523175	121029	6.03119e+06	5.48378e+06	5.24642e+06	4.39788e+06	663852	652570	477851
44149@[M+H]+@RANK1	7,8-Dihydroxyflavone	38183-03-8		C15H10O4	254.058	Flavonoids	255.1	129	+	7.38	4566.19	2499.34	4443.47	6320.84	5230.39	3617.41	3140.54	4321.17	4660.81	4465.04	6302.88	7358.64	4183.56	3918.29
48471@[M+H]+@RANK1	4',7-Dihydroxyflavone	2196-14-7	C12123	C15H10O4	254.058	Flavonoids	255.1	213.1	+	7.69	2846.7	3471	1749.3	6232.57	3432.6	4329.3	3556.43	2960.1	2307.6	2201.18	2215.8	1233	3576.68	4366.8
49592@[M+H]+@RANK1	4',5,6,7-Tetramethoxyflavone_5,6,7-trimethoxy-2-(4-methoxyphenyl)chromen-4-one	1168-42-9	C14472	C19H18O6	342.11	Flavonoids	343.1	107	+	11.66	17782.4	29067.9	69004.9	62156.7	9089.8	45798	25959.4	80010.2	32111.9	12610	11199.8	18559.9	7891.13	9855.71
47793@[M+H]+@RANK1	Licoisoflavone A	66056-19-7	C10486	C20H18O6	354.11	Flavonoids	355.1	55.1	+	10.98	122291	3557.59	1957.5	791263	2579.53	2494.25	668.498	2520.7	1255.96	600.066	1251.29	3955.98	1291.31	645.354
3550@[M+H]+@RANK1	Epigallate catechin gallate (EGCG)	989-51-5	C09731	C22H18O11	458.085	Flavonoids	459.1	139	+	5.14	4319.8	7974.85	1829	611.388		3615.68		3860.7	2393.23	5278.08	12962.4	3838.53		3461
43509@[M+H]+@RANK1	Karanjin	521-88-0		C18H12O4	292.074	Flavonoids	293.1	105	+	11.67	291793	544083	1.07577e+06	826187	995234	594828	707264	690001	559956	373921	355557	1.28412e+06	764120	673120
49507@[M+H]+@RANK1	Baicalin	21967-41-9	C10025	C21H18O11	446.085	Flavonoids	447.1	271.1	+	7.26	22447.6	41655.6	2369.95	3062.83	4860.8	2995.12	8153.98	1605.71	1894.07	3187.85	3364.84	6159.43	2285.56	4427.51
64303@[M+H]+@RANK1	Glycitin	40246-10-4	C16195	C22H22O10	446.121	Flavonoids	447.1	285.1	+	5.7	940.832	6290.09	2834.07	2326.99	5275.83	838.283	1130.98	8828.74	2676.62	7133.47	4710.25	4462.2	10741.1	7552.49
52759@[M+H]+@RANK1	Abyssinone V	77263-11-7	C09319	C25H28O5	408.194	Flavonoids	409.2	153	+	12.6	6572.68	10318.5	4622.66	4604.35	12763.2	24656.7	8210.64	5926.68	15242.6	5332.33	24094.5	12326.2	10390.3	19702.5
52760@[M+H]+@RANK1	6,8-Diprenylnaringenin	68236-11-3	C09724	C25H28O5	408.194	Flavonoids	409.2	69.1	+	12.62	13244.6	77604.9	35539.4	5622.55	12907.7	26684.9	18944.3	9493.16	4634.03	13005.3	18497.7	17229.8	20796.8	31070.9
47452@[M+H]+@RANK1	Kazinol A	99624-28-9	C09760	C25H30O4	394.214	Flavonoids	395.2	123	+	13.26	245787	224371	235841	277202	238650	203054	202677	195630	223874	266366	172971	331852	277720	127592
43747@[M+H]+@RANK1	Quercitrin	522-12-3	C01750	C21H20O11	448.101	Flavonoids	449.1	303	+	6.85	6340.26	1893.16	16261	17657.8	32839.8	14245.8	10072.8	15093.8	5397.49	5595.52	6961.5	17824.9	20842.1	16092.8
43969@[M+H]+@RANK1	Linarin	480-36-4		C28H32O14	592.179	Flavonoids	593.2	285.1	+	7.65	964.275	2913.4	1953.67	2274.68	3336.34	4101.78	1708.12	1966.82	3511.31	2779.8	860.107	490.808	1519.97	1476.91
44058@[M+H]+@RANK1	4'-Methoxyflavone	4143-74-2		C16H12O3	252.079	Flavonoids	253.1	210.1	+	11.4	10236.8	9707.76	8960.02	8667.51	7229.3	20578.4	5479.89	12169.2	7020.24	10685.3	11803.9	7267.28	9050.13	11199.1
49340@[M+H]+@RANK1	Morusin	62596-29-6	C10106	C25H24O6	420.157	Flavonoids	421.2	403.2	+	4.9	5660.15	1685.93	1137.64	4017.65	2904.9	4964.49	12164.4	3946.54	6983.65	2848.76	6614.48	2889.97	6757.51	3407.16
68948@[M+H]+@RANK1	7-Hydroxyflavone	6665-86-7	C11264	C15H10O3	238.063	Flavonoids	239.1	137	+	0.56	45476.1	81184.8	96823.6	101908	143555	184437	155022	202949	160358	80280.6	113326	144507	168616	105264
49089@[M+H]+@RANK1	Lonicerin	25694-72-8	C12630	C27H30O15	594.158	Flavonoids	595.2	269	+	6.08	2105	4579.45	9884.65	5119.94	6025.21	3878.15	4761.03	5368.08	6390.7	5900.86	6671.75	11373.5	5030.25	4500.79
52817@[M+H]+@RANK1	Poncirin	14941-08-3	C09830	C28H34O14	594.195	Flavonoids	595.2	269.1	+	8.16	5040.09	4452.43	3534.98	5451.53	8401.4	4523.04	7469.63	3518.88	3132.27	3388.28	5242.03	4267.65	12476.1	6217.66
92351@[M+H]+@RANK1	Chrysoeriol 7-apiosylglucoside	33579-63-4		C27H30O15	594.158	Flavonoids	595.2	283.1	+	5.32	4451.22	2134.13	3553	5257.34	13432.5	4043.09	4572.57	4110.75	4011.42	3954.43	1175.92	2269.76	7458.81	3956.77
89653@[M+H]+@RANK1	Daidzein-4',7-diglucoside	53681-67-7		C27H30O14	578.164	Flavonoids	579.2	399.1	+	5.94	2618.47	3637.72	6656.01	4402.31	454.74	2312.79	5564.07	2263.1	6795.11	509.86	1511.3	4254.44	2756.26	468.52
45735@[M+H]+@RANK1	Genistin_Genistein 7-O-Glucoside (Genistin)	529-59-9	C09126	C21H20O10	432.106	Flavonoids	433.1	271.1	+	6.77	1591.42	8316.71	20165.4	14290.3	12453.3	36125.2	65405.2	16750.9	4106.05	5819.07	9963.47	6917.05	123957	15898.9
64247@[M+H]+@RANK1	Pelargonidin-3-O-glucoside	18466-51-8	C12137	C21H20O10	432.106	Flavonoids	433.1	271.1	+	5.94	3496.28	7865.78	16325.5	44988.4	7771.41	50367	19430.1	6236.79	11203.3	11988.8	8135.13	17616.2	25235	15810.5
50258@[M+H]+@RANK1	Afzelin_Kaempferol 3-O-rhamnoside (Kaempferin)	482-39-3	C16911	C21H20O10	432.106	Flavonoids	433.1	287.1	+	5.95	4864.98	4389.39	11677	2318.93	1709.27	5333.36	2858.85	5620.57	1949.59	4241.09	5128.25	2880.72	4177.81	4727.19
47516@[M+H]+@RANK1	Hinokiflavone	19202-36-9	C10057	C30H18O10	538.09	Flavonoids	539.1	521.1	+	11.93	58555.4	34056.6	35863	62153.7	44400.4	34668.7	38522.2	66384.1	30635.6	62956.5	51264.9	31430	46930.3	25930.1
47522@[M+H]+@RANK1	Cupressuflavone	3952-18-9	C10034	C30H18O10	538.09	Flavonoids	539.1	521.1	+	9.67	9930.23	6884.83	26266.3	51350.8	31681	24743.8	14350.3	15221.5	10546.8	9777.68	5427.82	36635.3	18700.8	21593.3
93485@[M+H]+@RANK1	3,8'-Biapigenin	101140-06-1		C30H18O10	538.09	Flavonoids	539.1	521.1	+	11.92	58555.4	34056.6	35863	62153.7	44400.4	34668.7	38522.2	66384.1	30635.6	62956.5	51264.9	31430	46930.3	25930.1
47518@[M+H]+@RANK1	Sciadopitysin	521-34-6	C10182	C33H24O10	580.137	Flavonoids	581.1	563.1	+	12.82	13826.6	12001.9	24495.2	46188.5	14106.3	27833	25336.7	22795	17323.1	23306.2	14972.3	43586.9	8134.71	19798.9
49169@[M+H]+@RANK1	Isoscoparin	20013-23-4	C05990	C22H22O11	462.116	Flavonoids	463.1	445.1	+	6.23	2780.26	4800.75	10877.7	7008.85	5827.92	1998.68	1964.01	5559.49	7976.53	5917.96	8059.93	3915.32	7050.91	6131.54
49457@[M+H]+@RANK1	Swertiajaponin	6980-25-2	C10187	C22H22O11	462.116	Flavonoids	463.1	445.1	+	13.86	16422.6	36309	33022.1	38640.9	28593.2	36199.6	55591.7	17683	26305.2	12194.6	21551.7	29423	27219	18118.3
50852@[M+H]+@RANK1	Myricitrin_Myricetin 3-O-rhamnoside (Myricitrin)	17912-87-7	C10108	C21H20O12	464.095	Flavonoids	465.1	319	+	6.84	8114.98	3070.08	14775.3	49405.1	9624.89	3611.79	4353.45	6329.23	1555.16	6068.09	578.448	8316.13	8708.31	7304.31
64227@[M+H]+@RANK1	Isoquercitrin	21637-25-2	C05623	C21H20O12	464.095	Flavonoids	465.1	303	+	6.22	2545.89	10638.8	840.45	2980.07	9685.42	5255.87	8390.59	7214.43	7032.57	1279.67	3076.58	8679.17	13962.8	8591.68
51395@[M+H]+@RANK1	Quercetagetin	90-18-6	C10122	C15H10O8	318.038	Flavonoids	319	109	+	11.58	38123.3	86950	156638	44132.6	33581.1	85208.8	44647.1	78101	80619.2	94738.7	50575.4	42524.2	122148	50850
92568@[M+H]+@RANK1	Isorhamnetin-3-O-neohespeidoside	55033-90-4		C28H32O16	624.169	Flavonoids	625.2	317.1	+	6.11	865.536	33849.1	36862.4	77296.3	3714.97	57685	3747.25	1750.7	909.312	881.152	1368.44	3808.37	1688.56	1461.46
52936@[M+H]+@RANK1	Plantagoside	78708-33-5	C17531	C21H22O12	466.111	Flavonoids	467.1	287.1	+	6.85	11228.7	8886.6	33175.3	32585.5	18309.1	10923.8	14881.5	12823.8	1934.86	5288.5	6268.48	15110.8	19551.2	42200.9
52551@[M+H]+@RANK1	Liquiritigenin	578-86-9	C09762	C15H12O4	256.074	Flavonoids	257.1	121	+	9.65	3381.23	6851.31	19522.4	10303.2	6655.25	8062.4	11938	11835.7	3955.58	1959.01	3884.43	3852.66	10936.3	4025.57
68205@[M+H]+@RANK1	Hydrangenol	480-47-7	C10262	C15H12O4	256.074	Flavonoids	257.1	105	+	11.31	13517	12604.1	22896.3	35299	19480.5	19382.1	24987.4	16833.3	9655.82	16944.6	21645	41246.3	37851.9	16361.3
64295@[M+H]+@RANK1	Ononin_Formononetin 7-O-glucoside (Ononin)	486-62-4	C10509	C22H22O9	430.126	Flavonoids	431.1	269.1	+	7.3	7483.71	3478.23	5963.38	6546.15	8251.64	4428.91	2298.27	2890.95	2594.43	2537.78	3738.31	5182.56	5029.5	5994.25
64304@[M+H]+@RANK1	Daidzin	552-66-9	C10216	C21H20O9	416.111	Flavonoids	417.1	255.1	+	5.57	1039.9	3491.73	7966.64	10115.8	12249.1	13568.2	8067.08	3522.63	6172.91	6484.08	13431.1	20077.2	3686.83	4530.8
92785@[M+H]+@RANK1	Malvidin-3-O-galactoside	30113-37-2		C23H25O12	493.135	Flavonoids	494.1	331.1	+	7.75	6664.31	4799.27	3483.14	9821.07	9494.25	7557.22	4748.88	5175.93	2401.07	4832.69	5124.56	10008.6	5146.85	6291.02
95004@[M+H]+@RANK1	2,3-Dehydrosilybin A	25166-14-7		C25H20O10	480.106	Flavonoids	481.1	463.1	+	5.53	1510.66	5267.7	3575.21	3935.57	7797.63	3143.79	10347.2	6640.77	7554.7	5120.34	12277.9	4574.09	9196.97	3582.22
71696@[M+H]+@RANK1	Astilbin	29838-67-3	C17449	C21H22O11	450.116	Flavonoids	451.1	123	+	6.31	29787.1	14200.1	143298	191685	154094	8576.43	30945.8	41793.5	1337.05	3565.4	5184.08	50636.3	82016.7	80812.6
68131@[M+H]+@RANK1	Kuwanon H	76472-87-2	C10100	C45H44O11	760.288	Flavonoids	761.3	743.3	+	12.04	11127.5	28551.4	31125.4	32170.5	18904.7	35644	23572.4	44216.9	14733.5	25101.8	16432.9	28336.5	23498.6	36654.4
92494@[M+H]+@RANK1	Procyanidin A1	103883-03-0		C30H24O12	576.127	Flavonoids	577.1	109	+	8.38	8497.94	5405.6	20811.5	12285	20120.4	7440.29	7413.45	10086.2	4655.35	3814.04	1768.17	16690.9	24247.2	63713.5
92763@[M+H]+@RANK1	Cyanidin-3-O-rhamnoside chloride	38533-30-1		C21H21O10	433.113	Flavonoids	434.1	271.1	+	7.32	2041.66	4149.15	3402.96	3353.31	4136.4	2472.04	6279.34	4284.95	1827.88	2531.44	4655.04	6105.02	4801.19	5293.21
94059@[M+H]+@RANK1	6''-O-Acetylglycitin	134859-96-4		C24H24O11	488.132	Flavonoids	489.1	285.1	+	12.35	3178.54	16228.5	21818.5	24829.1	26698.4	27549.9	53114.9	55327.8	56943.4	10979.1		31715	44586.9	24185.2
49754@[M+H]+@RANK1	Wogonin	632-85-9	C10197	C16H12O5	284.068	Flavonoids	285.1	270.1	+	11.08	6065.89	644.855	2928.6	3841	633.033	1314.66	1951	2591.84	1846	600.066	608.724	4498.02	3392.5	1519.43
43786@[M+H]+@RANK1	Homopterocarpin	606-91-7		C17H16O4	284.105	Flavonoids	285.1	107	+	9.07	12852.3	15974.1	18137.3	26179	18440.5	20366.2	29858	28072.7	23430.5	16146.7	13773.5	22249.2	29952.9	25907.9
47576@[M+H]+@RANK1	Calycosin	20575-57-9	C01562	C16H12O5	284.068	Flavonoids	285.1	267.1	+	9.1	6719.45	2728.19	8408.88	4691.1	5321.53	5867.44	5119.13	2710.64	4947.27	1423.15	5894.14	2540.45	3019.43	2495.55
64207@[M+H]+@RANK1	Fustin	20725-03-5	C01378	C15H12O6	288.063	Flavonoids	289.1	121	+	7.59	5156.53	8291.64	18515.6	20456.9	24157.8	12346	10912	10856.8	8948.21	6675.68	3927.69	7598.68	13853.6	23013.6
52931@[M+H]+@RANK1	Homoeriodictyol	446-71-9	C09756	C16H14O6	302.079	Flavonoids	303.1	153	+	6.83	1521.92	4444.74	2040.13	2829.22	5951.01	4288.82	2210.85	1215.58	1986.11	6327.66	2343.48	4522.83	5346.6	4482.16
3445@[M+H]+@RANK1	Isorhamnetin	480-19-3	C10084	C16H12O7	316.058	Flavonoids	317.1	153	+	9.23	3347.39	3787.16	2955.49	3422.7	982.399	2432.58	4215.55	4775.03	820.107	561.771	2417.32	2362.92	798.899	2806.43
49656@[M+H]+@RANK1	Pedalitin	22384-63-0	C10119	C16H12O7	316.058	Flavonoids	317.1	109	+	12.08	14120	20757.1	36876.1	41413.4	24097.1	30606.4	26648.8	30103.4	12755.3	18482.1	30560	29365.5	31842.4	28338.6
64229@[M+H]+@RANK1_64268@[M+H]+@RANK1	Kaempferol 3-O-beta-sophoroside;Cyanin	19895-95-5;2611-67-8;20905-74-2	C12634;C08639	C27H30O16	610.153	Flavonoids	611.2	287.1	+	6.83	3055.58		3286.4	4509.39	8694.43	2837.5	790.856	1692.85	775.01	773.828	2337.09	1611.51	5191.99	5282.2
47251@[M+H]+@RANK1_47252@[M+H]+@RANK1	(+)-Afzelechin;(-)-Epiafzelechin	2545-00-8;24808-04-6	C09320;C12128	C15H14O5	274.084	Flavonoids	275.1	139	+	1.09	22106	30243.9	16069.9	10411.1	27168.7	48445.5	45539.4	271255	53734.9	79434.1	136879	16961.1	32202.1	32507.3
48904@[M+H]+@RANK1_48940@[M+H]+@RANK1	Luteolin-6-C-glucoside;Orientin	4261-42-1;28608-75-5	C01821;C10114	C21H20O11	448.101	Flavonoids	449.1	431.1	+	5.56	25699.3	19422.1	33343	60128.8	3924.87	25592.6	3522.96	13404.9	8571.22	997.335	21670.3	25405.3	35199	17273.9
64244@[M+H]+@RANK1_64941@[M+H]+@RANK1	Delphinidin-3-O-glucoside;Isoquercitrin	6906-38-3;50986-17-9;482-35-9	C12138	C21H20O12	464.095	Flavonoids	465.1	303.1	+	6.06	13238	6097.03	10895.4	6119.56	7520.86	6451.46	6721.14	6536.99	17045.7	1333.8	13232.9	6312.47	4659.87	2548.33
STD_13463-28-0@-@RANK1	Eriocitrin	13463-28-0	C09732	C27H32O15	596.174	flavonoids	595	458.9	-	5.79	9429.22	9229.38	7715.04	11158.9	6492.31	10769.2	6389.48	6050.71	6569.83	17385	4585.71	11774.7	14910.8	11681.9
STD_446-72-0@+@RANK1	Genistein	446-72-0	C06563	C15H10O5	270.053	flavonoids	271.2	242.8	+	8.93	9132.42	4039.28	3915.8	6852.3	3019.52	11891.7	7261.38	10034.2	5102.44	6108.06	9230.25	5226.06	6891.22	5262.04
STD_480-40-0@+@RANK1	Chrysin	480-40-0	C10028	C15H10O4	254.058	flavonoids	255.2	152.8	+	10.94	9065	6493.5	9399.99	8720	7553.68	9275.85	11281.8	3185.64	5081.13	4470.03	3516	6536.33	6752.81	8013.76
STD_482-36-0@+@RANK1	Hyperoside	482-36-0	C10073	C21H20O12	464.096	flavonoids	465.4	302.8	+	6.99	8302.92	5427.04	13764.1	18457	13732.7	10901.8	8784.3	6942.96	4415.93	424.19	5839.96	13783.7	16833.8	16100.4
STD_482-35-9@+@RANK1	Isoquercitrin	482-35-9	C05623	C21H20O12	464.096	flavonoids	465.4	302.8	+	6.06	13238	6097.03	10895.4	6119.56	7520.86	6451.46	6721.14	6536.99	17045.7	1333.8	13232.9	6312.47	4659.87	9245.89
STD_520-34-3@+@RANK1	Diosmetin	520-34-3	C10038	C16H12O6	300.063	flavonoids	301.3	285.8	+	9.15	6632.74	5111.73	14664.2	14781.4	19733.1	659.68	3096.22	1708.95	987.259	3484.55	4817.95	12358.9	23059.7	4626.3
STD_491-80-5@+@RANK1	Biochanin A	491-80-5	C00814	C16H12O5	284.068	flavonoids	285.3	269.3	+	11.21	17898.6	13289.3	7361.15	7172.03	7076.82	3459.68	9569.68	6022.31	14630.4	10979.6	10945.5	21543.4	9501.83	7165.43
STD_520-28-5@+@RANK1	Tectochrysin	520-28-5	C11621	C16H12O4	268.074	flavonoids	269	253.9	+	11.8	3163.88	9145.02	2283.5	1600.56	748.75	5614.36	731.435			1567.45	5209.59			5075.44
STD_73692-50-9@+@RANK1	Chalconaringenin	73692-50-9	C06561	C15H12O5	272.068	flavonoids	272.9	152.9	+	8.78	4325.4	4184.04	1119.53	6047.49	5074.39	1773.49	4787.39	2601.72	4475.28	5773.32	3340.14	4992.2	4382.86	568.26
STD_480-41-1@+@RANK1	Naringenin	480-41-1	C00509	C15H12O5	272.068	flavonoids	273.3	152.8	+	8.86	3516.42	4184.04	3171.23	6202.31	3050.97	1093.03	4955.95	3269.97	3597.2	4222.65	2547.7	4992.2	5824.35	3298.83
STD_60-82-2@+@RANK1	Phloretin	60-82-2	C00774	C15H14O5	274.084	flavonoids	274.9	169	+	8.85	1651.84	5421.98	8714.71	23925.9	13375	3888.04	6272.36	3598.63		2719.41	4817.25	17021.3	9341.57	4417.33
STD_437-64-9@+@RANK1	Genkwanin	437-64-9	C10046	C16H12O5	284.068	flavonoids	284.9	269.9	+	11.1	8056	644.855	2928.6		2556.69	1314.66	1359.35	6176.38	1846	1352.01	608.724	4498.02	3392.5	6834
STD_491-70-3@+@RANK1	Luteolin	491-70-3	C01514	C15H10O6	286.048	flavonoids	286.9	240.9	+	8.03	4604.53	5291.14	3538.1	4520.07	5026.64	2006.29	2877.54	5022.36	3271.14	4590.23	4972.51	2010.43	2782.14	1577.11
STD_528-48-3@+@RANK1	Fisetin	528-48-3	C01378	C15H12O6	288.063	flavonoids	286.9	241	+	7.03	7711.91	6916.49	4144.8	3358.68	3333.3	5858.84	6680.24	2474.65	12040.4	1992.4	12508	10699.7	6281.46	5402.87
STD_480-43-3@+@RANK1	Isosakuranetin	480-43-3	C05334	C16H14O5	286.084	flavonoids	287.3	160.9	+	11.04	1912.84	8028.73	8882.03	2510.04	4752.88	6987.47	6452.03	4816.14	1915.69	3671	1781.5	6137.89	1911.51	2530.7
STD_552-58-9@+@RANK1	Eriodictyol	552-58-9	C05631	C15H12O6	288.063	flavonoids	288.9	163	+	7.9	4541.56	5894.95	9927.24	14448.9	15936.3	14321.2	14868.4	6057.4	4030.96	3493.76	5176.54	20968.3	22163.3	18412.6
STD_548-77-6@+@RANK1	Tectorigenin	548-77-6	C10534	C16H12O6	300.063	flavonoids	300.9	285.5	+	9.03	1255.96	3479.24	2547.7	6251.55	6789.36	630.221	1393.57		1618.1	5643.94	3286.05	2813.65	7208.3	3476.53
STD_970-73-0@+@RANK1	Gallocatechin	970-73-0	C12127	C15H14O7	306.074	flavonoids	306.9	180.9	+	3.36	3029.41	1857.85	1344.95	1589.04	3105.16	2791.22	1695.69	10242.7	4050.72	4701.11	4740.53	1326.2	3366.35	1743.02
STD_529-44-2@+@RANK1	Myricetin	529-44-2	C10107	C15H10O8	318.038	flavonoids	318.9	272.9	+	7.05	3887.16	4926.9	5287.3	7090.19	7221.29	4190.76	2838.6	1800.54	5560.72	17223.8	7971.57	8325.33	4232.43	3719.87
STD_27200-12-0@+@RANK1	Dihydromyricetin	27200-12-0	C02906	C15H12O8	320.053	flavonoids	320.9	302.8	+	5.27	38902.1	6768.55	45746.2	4586.79	2028.03	9571.74	2884.42	59498.2	2273.96	13948	115262	64291.1	3352.34	8303.65
STD_59870-68-7@+@RANK1	Glabridin	59870-68-7	C10421	C20H20O4	324.136	flavonoids	325.4	188.9	+	11.58	7768.74	12632.6	12180.5	2869.95	12936.8	5641.82	1424.05	8290	2320.5	3684.52	3606.56	5200.26	1452.39	15835.3
STD_481-53-8@+@RANK1	Tangeretin	481-53-8	C10190	C20H20O7	372.121	flavonoids	372.8	357.8	+	11.37		6006.79		5276.34	2927.93	22628	14498.6	2278.5		2953.93		2842.62
STD_478-01-3@+@RANK1	Nobiletin	478-01-3	C10112	C21H22O8	402.132	flavonoids	403.4	387.8	+	11.03	2602.02	6775.78	4706.83	2648.01	7942.65	8512.61	11813.7	8636.33	9238.98	6919.51	2969.76	7002.14	10646.9	17646.1
STD_5373-11-5@+@RANK1	Cynaroside	5373-11-05		C21H20O11	448.101	flavonoids	449	286.9	+	6.1	17253.1	21915.6	150499	144636	8050.01	84585.1	54626.1	71045.6	9574.15	5506.74	16187	16975.5	122999	14375.6
STD_22888-70-6@+@RANK1	Silibinin	22888-70-6	C07610	C25H22O10	482.121	flavonoids	483.5	464.8	+	8.65	3492	11175.5	42211.7	58807.1	48700.9	21154.3	10924.3	14921.2	13228	1564.58	8009.62	43082.2	18660	24775.9
STD_1617-53-4@+@RANK1	Amentoflavone	1617-53-4	C10018	C30H18O10	538.09	flavonoids	539	402.9	+	9.78	2319.44	790.479	3061.9	433.026	1944.69	874.725	1499.08	3430.19	1340.75	1715.39	2608.06	2165.09	2630.36	3084.59
STD_17306-46-6@+@RANK1	Rhoifolin	17306-46-6	C12627	C27H30O14	578.164	flavonoids	579	433	+	6.5	9268.02	3723.33	12489.2	6361.45	19911.4	7700.6	4567.17	8927.8	4856.23	3957.24	11565.6	12729.5	14103.5	5039.54
STD_17650-84-9@+@RANK1	Kaempferol-3-O-rutinoside	17650-84-9	C21833	C27H30O15	594.159	flavonoids	595	449	+	6.29	4053.22	5327.78	2482.7	2623.76	3664.76	1702.97	6104.35	1735.33	6600.35	9260.08	1727.37	5817.19	8822.78	8918.17
STD_520-27-4@+@RANK1	Diosmin	520-27-4	C10039	C28H32O15	608.174	flavonoids	609.1	463	+	6.59	859.423	7050.69	5927.1	927.391	4807.24		2239.98	946.508	1412.9	906.417	4285.11		1390.61	5109.71
STD_489-32-7@+@RANK1	Icariin	489-32-7	C17555	C33H40O15	676.237	flavonoids	677.1	531.1	+	8.12	1615.44	2432.58	1027.01	2553.21	319.32	918.995	4563.33	348.534	1417.94	3903.07	1371.71	2453.47	345.72	930.045
STD_3681-99-0@+@RANK1	Puerarin	3681-99-0	C10524	C21H20O9	416.111	flavonoids	417.4	416.8	+	4.89	196583	324533	271297	264916	212337	491149	798661	427560	1.38398e+06	908163	1.10306e+06	261140	175053	253748
47967@[M+H]+@RANK1_52565@[M+H]+@RANK1	2'-Hydroxydihydrodaidzein;Butin	492-14-8	C03567;C09614	C15H12O5	272.068	Isoflavonoids;Flavonoids	273.1	121	+	8.83	11852.3	5701.76	15326.5	8462.67	11477.3	4907.82	9895.79	9640.22	11829	4696.16	6408.03	5077.62	6593.09	9315.95
91590@[M+H]+@RANK1	Anwulignan	107534-93-0		C20H24O4	328.167	Lignans	329.2	135	+	11.6	17500	7126.09	65074.9	29979.2	39786	29320.1	31206.3	33288.4	18839.2	26948.4	29150	36502.8	41078.1	27550
63053@[M+H]+@RANK1	Sesamin	607-80-7	C10882	C20H18O6	354.11	Lignans	355.1	135	+	10.09	2863.2	1125.04	4624.55	4195.79	20070.2	3538.94	4405.69	3948.59	4196.48	2653.04	4263.63	3316.87	3085.57	6085.08
68397@[M+H]+@RANK1	Futoquinol	28178-92-9	C10574	C21H22O5	354.147	Lignans	355.2	41	+	11.42	7980.27	1504.42	2288.5	2263.5	2092.5	74065.8	2372.5	52091	35252.9	674.991	22928.2	742.59	1503.45	748.418
68370@[M+H]+@RANK1	Syringaresinol-di-O-glucoside	66791-77-3	C10543	C34H46O18	742.268	Lignans	743.3	563.2	+	11.16	1952	5001.95	6527.97	5326.24	2534.03	3176.47	2600.85	9415.98	4019.87	7784	10681.3	8350.64	4558	3734
91550@[M+H]+@RANK1	Liriodendrin	573-44-4		C34H46O18	742.268	Lignans	743.3	563.2	+	12.13	3158.54	79513.9	829.503	24756.1	449533	5328.92	4041.3	2358.5	3232.52	1617.14	5743.85	834.664	2447	3918.61
68382@[M+H]+@RANK1	Diphyllin	22055-22-7	C10559	C21H16O7	380.09	Lignans	381.1	335.1	+	10.09	9445.19	4370.8	6112.02	17773.6	15288	4569.93	5996.33	5552.59	6845.13	2772.41	3107.65	10305.4	15910.8	1351.75
88536@[M+H]+@RANK1	Butyl 4-Hydroxybenzoate	94-26-8		C11H14O3	194.094	Lignans	195.1	57.1	+	4.56	3483.47	4070.79	3233.05	6019.73	3285.23	6061.33	4614.15	6256.82	7104.05	6101.62	7617.11	4065.88	4966.16	7822.54
68372@[M+H]+@RANK1	Arctigenin	7770-78-7	C10545	C21H24O6	372.157	Lignans	373.2	137.1	+	11.39	8023.4	5963.36	9443.48	13570.2	4914.8	20625.8	6688.05	9674.35	14276.8	8417.49	14479	8971.16	3278.36	2186.5
68455@[M+H]+@RANK1	Kadsurin A	99340-07-5	C10640	C21H24O6	372.157	Lignans	373.2	135	+	11.39	8138.63	4808.63	12234.6	6214.49	7355.93	6127.94	7866.88	8621.04	5360.72	3687.74	3247.77	11698.4	3701.57	3685.58
71534@[M+H]+@RANK1	Schisandrol A	7432-28-2	C17064	C24H32O7	432.215	Lignans	433.2	415.2	+	11.58	27178.9	29769.3	26609.6	8003.5	32101.5	32593.9	29898.4		98355	66748	77314	35811.3	40389.9	24320.5
89725@[M+H]+@RANK1	Sesamolin	526-07-8		C20H18O7	370.105	Lignans	371.1	203.1	+	7.55	3543.61	1426.71	1698.51	3643.43	2209.72	2165.52	5491.32	1333.04	469.481	1858.14	242.585	475.6	1960.34	2285.83
68646@[M+H]+@RANK1	Podophyllotoxinone	477-49-6	C10875	C22H20O8	412.116	Lignans	413.1	395.1	+	5.42	521.801	3748.34	4289.79	4312.19	2699.61	10853.1	7863.52	3301.73	4375.27	13082.8	7907.93	2690.37	1092.63	3551.88
2039@[M+H]+@RANK1	Podophyllotoxin	518-28-5	C10874	C22H22O8	414.131	Lignans	415.1	397.1	+	9.66	3292.26	2176.79	10951.1	23443.9	15524.3	4881.42	4402.51	8524.39	2399.7	5526.5	3399.02	9929.37	4251.09	5056.66
68532@[M+H]+@RANK1	alpha-Peltatin	568-53-6	C10729	C21H20O8	400.116	Lignans	401.1	165.1	+	12.59	29778.3	13541.8	8502.32	1656.68	12326.4	6202.34	3366.16	5919.83	13153.5	5234.68	11863.4	7315.66	15365.3	7345
71429@[M+H]+@RANK1	Arctiin	20362-31-6	C16915	C27H34O11	534.21	Lignans_Others	535.2	177.1	+	8.24	4060.73	944.649	9793.53	7345.48	2075.17	8172.52	2949.56	2992	3587.1	1689.06	1407.19	1947.4	2762.14	12825.5
273@[M+H]+@RANK1	Trigonelline	535-83-1	C01004	C7H7NO2	137.048	Alkaloids	138.1	65	+	0.82	1.17552e+06	1.11405e+06	2.45306e+06	2.95594e+06	3.18954e+06	647296	774346	495948	871705	835186	806924	1.19658e+06	1.10283e+06	1.38554e+06
286@[M+H]+@RANK1	Indole	120-72-9	C00463	C8H7N	117.058	Alkaloids	118.1	91.1	+	3.82	7.06962e+06	7.53037e+06	2.46562e+07	2.56275e+07	2.32223e+07	1.22859e+07	1.11632e+07	10602339	3.08783e+06	3.09277e+06	2.86377e+06	1.34737e+07	1.49446e+07	1.39969e+07
93101@[M+H]+@RANK1	O-Acetylethanolamine	1854-30-4		C4H9NO2	103.063	Alkaloids	104.1	44	+	0.67	20646815	2.00991e+07	2.85915e+07	3.52427e+07	3.58689e+07	3.29741e+07	2.66087e+07	3.3584e+07	2.83649e+07	1.96886e+07	2.90541e+07	2.86218e+07	3.27115e+07	3.60341e+07
35687@[M+H]+@RANK1	D-Serine	312-84-5	C00740	C3H7NO3	105.043	Alkaloids	106	60	+	0.66	530679	572578	464690	519155	551425	639298	721697	729832	510281	533479	541787	595071	767940	638930
86434@[M+H]+@RANK1	Methyl anthranilate	134-20-3	C20634	C8H9NO2	151.063	Alkaloids	152.1	135	+	2.11	775312	827984	1.87583e+06	2.06337e+06	10507.3	5130.45	2.30262e+06	2.20646e+06	252724	3601.41	260282	4.25753e+06	2.51624e+06	2.20346e+06
66895@[M+H]+@RANK1	Bufotenine	487-93-4	C08299	C12H16N2O	204.126	Alkaloids	205.1	160.1	+	10.57	4584.57		1161.25	4771.26	1813.17		1189.26	3152.3				1203.6	3548	2958.91
68556@[M+H]+@RANK1	N-Methylcytisine	486-86-2	C10760	C12H16N2O	204.126	Alkaloids	205.1	134.1	+	1.14	1974.78	2520.49	1567.21	1988.75	966.725	2349.49	1645.22	1484.77	5371.69	3190.09	2125.24	3221.4	2780.59	1653.93
5683@[M+H]+@RANK1	Kynurenic acid	492-27-3	C01717	C10H7NO3	189.043	Alkaloids	190	144	+	4.36	13170.1	12309.3	28072.7	14554.7	30665.7	10085.4	5941.61	9966.09	6940.11	9695.61	8399.33	19711.4	19211.4	12682.4
43861@[M+H]+@RANK1	Cytisine	485-35-8	C10763	C11H14N2O	190.111	Alkaloids	191.1	44.1	+	1.22	4160.64	4530.53	2444.87	1189.7	2395.81	7855.75	11197.8	11041.6	40162.7	33836	52434.7	2009.04	5023.86	4110.32
3350@[M+H]+@RANK1	Harmaline	304-21-2	C06536	C13H14N2O	214.111	Alkaloids	215.1	172.1	+	10	1598.57	10184.9	15100.7	9931.53	11951	6467.36	10598	5087.74	4291.85	7420.09	4369.17	12634.4	7881.31	6051.75
64742@[M+H]+@RANK1	Lumichrome	1086-80-2	C01727	C12H10N4O2	242.08	Alkaloids	243.1	198.1	+	6.7	62059.3	61749.9	105631	113744	104302	143922	112591	152924	95244.9	69330.9	81787.3	223959	144000	169131
91472@[M+H]+@RANK1	Nordihydrocapsaicin	28789-35-7	C20216	C17H27NO3	293.199	Alkaloids	294.2	137.1	+	11.87	12213.1	8747.63	22509.8	43424	35771.3	43313.3	26700	24764.2	9153.06	14324.3	26427.8	32570.6	27916.5	18722.2
3422@[M+H]+@RANK1	Cinchonine	118-10-5	C06528	C19H22N2O	294.173	Alkaloids	295.2	79.1	+	11.99	479040	436715	1.0524e+06	1.34575e+06	937823	1.34259e+06	1.49736e+06	1.93829e+06	260230	152521	318762	3.17368e+06	945175	1.20861e+06
44020@[M+H]+@RANK1	(-)-Cinchonidine	485-71-2	C11379	C19H22N2O	294.173	Alkaloids	295.2	81.1	+	11.99	1.16332e+06	818627	3.77401e+06	3.89747e+06	4.14304e+06	2.32485e+06	2.70675e+06	2.6781e+06	513663	766394	366716	2.94179e+06	3.66302e+06	1.31283e+06
3463@[M+H]+@RANK1	Strychnine	57-24-9	C06522	C21H22N2O2	334.168	Alkaloids	335.2	184.1	+	3.67	359.922	1979.99	1673.07	915.6	917.379	540.736	762.66	3179.97	2764.77	2581.49	2039.48	1468.04	1092.27	2242.89
68314@[M+H]+@RANK1	Triangularine	87340-27-0	C10410	C18H25NO5	335.173	Alkaloids	336.2	55.1	+	11.72	274989	362126	461939	262932	277923	326189	209498	238424	265822	206468	315014	327781	358529	108389
68293@[M+H]+@RANK1	Sarracine	2492-09-03	C10383	C18H27NO5	337.189	Alkaloids	338.2	55.1	+	13.14	1.82776e+07	2.25946e+07	3.73022e+07	3.11485e+07	2.49901e+07	2.34376e+07	1.86095e+07	2.69577e+07	2.53649e+07	2.46177e+07	1.93905e+07	2.39725e+07	2.35987e+07	1.18526e+07
86189@[M+H]+@RANK1	3alpha,6beta-Ditigloyloxytropan-7beta-ol	7159-86-6		C18H27NO5	337.189	Alkaloids	338.2	55.1	+	13.21	1.82776e+07	2.25946e+07	3.73022e+07	3.11485e+07	2.49901e+07	2.34376e+07	1.86095e+07	2.69577e+07	2.53649e+07	2.46177e+07	1.93905e+07	2.39725e+07	2.35987e+07	1.18526e+07
64329@[M+H]+@RANK1	Serpentine	18786-24-8	C09241	C21H20N2O3	348.147	Alkaloids	349.2	219.1	+	5.81	10495.6	13471.9	15105.8	12646.6	20176.7	16440.2	9224.68	9507.52	10838.1	7753.56	33825	9726.56	3399.85	11656.8
1497@[M+H]+@RANK1	Nicotinamide	98-92-0	C00153	C6H6N2O	122.048	Alkaloids	123.1	80.1	+	1.01	39261.8	89953	137071	56310.9	64697.2	105519	91196.8	47345	50046.1	53887.2	89759.8	122268	113092	138268
67569@[M+H]+@RANK1	Tabernanthine	83-94-3	C09274	C20H26N2O	310.205	Alkaloids	311.2	138.1	+	3.79	1455.9	2641.73	379.771	1114.8	1767.44	1753.14	1144.08	3510.89	4596.75	3197.47	3447.01	2073.47	1804.69	1681.02
68137@[M+H]+@RANK1	Astrocasine	2114-92-3	C10130	C20H26N2O	310.205	Alkaloids	311.2	103.1	+	13.94	3799.98		1529.91	1063.26	2967.37	2533.41	3054.53	923.751	2067.33	1329.91	2438.2	2204.88	3629.32	1716.01
65553@[M+H]+@RANK1	5-Hydroxytryptophan	56-69-9	C01017	C11H12N2O3	220.085	Alkaloids	221.1	175.1	+	10.88	12256.1	10492	6980.98	10272.8	5681.29	5278.65	4058.25	4565.01	9607.75	5547.6	6178.82	11885.9	5465.95	4433.99
1526@[M+H]+@RANK1	L-Nicotine	1954-11-05	C00745	C10H14N2	162.116	Alkaloids	163.1	130.1	+	2.29	14521.9	14888.4	42950.7	17454.4	12920.2	28407.6	19216.9	14985	14534.7	29204	25496.3	12092.5	27995.9	19908.8
44665@[M+H]+@RANK1	Abrine	526-31-8	C02983	C12H14N2O2	218.106	Alkaloids	219.1	132.1	+	10.91	6744.27	6184.97	4911.28	3637	7966.72		625.041	7462	3841	2968.09	6468.98		1872	3076.46
68547@[M+H]+@RANK1	Aloperine	56293-29-9	C10748	C15H24N2	232.194	Alkaloids	233.2	174.1	+	7.22	3846.61	4348.73	11463.4	9057.11	6323.18	14009.7	5995.98	9366.43	7660.04	3941.58	11200.2	5259.74	5200.26	12735.3
41557@[M+H]+@RANK1	(2S,3R,4E)-2-Amino-4-heptadecene-1,3-diol	6918-48-5		C17H35NO2	285.267	Alkaloids	286.3	268.3	+	11.14	80763.2	88612.6	116707	113195	137435	171497		117747	121035	101233	140580	162042	150631	138623
41806@[M+H]+@RANK1	Solasodine	126-17-0	C10822	C27H43NO2	413.329	Alkaloids	414.3	396.3	+	11.84	20707.1	21915	44982.5	25302.9	41637.8	46938.2	25111.4	36642.7	31632	22042.8	14806.1	24913.3	29008.3	20125.6
67613@[M+H]+@RANK1	(-)-Anonaine	1862-41-5	C09339	C17H15NO2	265.11	Alkaloids	266.1	192.1	+	7.42	2319.06	5399.89	1727.16	499.237	732.075	1468.01	1495.84	1465.28	4735.52	1445.48	872.255	1357.8	490.627	4028.87
1455@[M+H]+@RANK1	Caffeine	1958-08-02	C07481	C8H10N4O2	194.08	Alkaloids	195.1	138.1	+	4.5	7198.08	2563.52	1410.78	4077.77	285.348	8615.65		1113.5	542.136	1106.95	12506.1	3636.43		4771.28
43822@[M+H]+@RANK1	Lycorine	476-28-8	C08532	C16H17NO4	287.116	Alkaloids	288.1	147	+	7.59	1911.45	6890.26	2515.03	5078.57	3437.85	2213.23	4004.1	4303.18	3754.72	7275.82	3409.55	3896.17	3991.46	3721.14
89306@[M+H]+@RANK1	Pipermethystine	71627-22-0		C16H17NO4	287.116	Alkaloids	288.1	228.1	+	7.57	474.221	1634.82		1252.2	486.526		2143.44	746.52	475.978	1231.59	986.895	1212.36	982.942	1243.8
43921@[M+H]+@RANK1	Brucine	4845-99-2_357-57-3	C09084	C23H26N2O4	394.189	Alkaloids	395.2	244.1	+	4.38	1731.43	1449.14	1019.65	846.362	2541.9	2466.38	2018.98	4298.04	9202.55	8069.76	7319.21	740.658	1565.74	495.962
43765@[M+H]+@RANK1	Dictamnine	484-29-7	C10660	C12H9NO2	199.063	Alkaloids	200.1	129.1	+	9.9	6359.62	6902.11	5793.73	3504.2	6492.72	13113	6384.55	4290.36	2222.15	2811.21	3221.16	4345.2	2634.08	4294.01
64430@[M+H]+@RANK1	Methylecgonine	7143-09-01	C12448	C10H17NO3	199.121	Alkaloids	200.1	182.1	+	3.14	2188.07	2604.72	2337.98	2724.44	2247.18	2764.78	3108.88	1434.09	4361.43	4565.14	781.138	1676.14	3483.59	4350.18
68315@[M+H]+@RANK1	Tussilagine	80151-77-5	C10411	C10H17NO3	199.121	Alkaloids	200.1	182.1	+	3.85	6706.08	5761.53	1952.03	8613.59	6107.99	6329.94	4877.6	6865.53	3384.52	2448	5096.13	7850.41	3798.91	5983.72
43815@[M+H]+@RANK1	Cevadine	62-59-9		C32H49NO9	591.341	Alkaloids	592.3	574.3	+	13.28	51424	670043	56034.1	518447	636876	782838	1.2024e+06	373933	950726	552354	700570	259059	586334	249784
43847@[M+H]+@RANK1	Yohimbic acid monohydrate	522-87-2		C20H24N2O3	340.179	Alkaloids	341.2	144.1	+	13.75	23768	22815.5	8344.79	12761.8	3651.44	25571.7	1264.42	11112.5	29242.8	10467.4	7348.94	3273.63	14243.6	14873.9
63097@[M+H]+@RANK1	D-Aspartic acid	1783-96-6	C00402	C4H7NO4	133.038	Alkaloids	134	74	+	0.76	1.26698e+06	1.37633e+06	1.40289e+06	1.23185e+06	1.49098e+06	1.49857e+06	1.52874e+06	1.20529e+06	1.9955e+06	1.72481e+06	2.03351e+06	1.42491e+06	1.73341e+06	1.7004e+06
68291@[M+H]+@RANK1	Rosmarinine	520-65-0	C10380	C18H27NO6	353.184	Alkaloids	354.2	336.2	+	9.38	1482.34	2074.18	9303.86	10458.5	8772.08	2724.78	5507.62	2724.3	3209.44	1322.78	884.393	17440.8	8702.46	4338.4
6988@[M+H]+@RANK1	Protopine	130-86-9	C05189	C20H19NO5	353.126	Alkaloids	354.1	188.1	+	11.45	728.604	14744.4			32130.4		16774.8		28240.7	29860.5	11460.2	28403.6	22261.3
95841@[M+H]+@RANK1	Agrocybenine	178764-92-6		C12H18N2O	206.142	Alkaloids	207.1	55.1	+	5.03	7281.33	8448.43	30301.4	12871.2	41376.9	20957	39534	32708.5	23404.2	25103.5	12516.9	38827.6	27206.1	42359.5
44747@[M+H]+@RANK1	Dihydrocapsaicin	19408-84-5	C16952	C18H29NO3	307.215	Alkaloids	308.2	137.1	+	11.94	5121.43	7484.92	13407.8	10813.5	8613.91	32782.4		17554.6	7943.92	11289	10800.4	22113.2	13705.4	10074.2
67049@[M+H]+@RANK1	Narciclasine	29477-83-6	C08533	C14H13NO7	307.069	Alkaloids	308.1	216	+	4.12	845.5	4006.26	1333.97	2525.69	2126.35	1742.24	840	3276.75	2153.53	2910.54	4039.96	3160.07	2597.9	3092.55
68538@[M+H]+@RANK1	Rutacridone	17948-33-3	C10738	C19H17NO3	307.121	Alkaloids	308.1	252.1	+	12.87	2526.58	7985.96	8972.15	9514.02	3780.81	5905.33	3405.68		6718.31	3483.83	4322.68	6967.01	6202.63	2403.76
44431@[M+H]+@RANK1	Desoxypeganine	495-59-0	C10656	C11H12N2	172.1	Alkaloids	173.1	144.1	+	8.38	8132.94	4678.62	5177.08	13349.6	9827.29	7076.15	4772.1	8059.16	3756.56	3185.54	9720.99	4400.38	4096.38	12200.8
67534@[M+H]+@RANK1	Mitraphylline	509-80-8	C09227	C21H24N2O4	368.174	Alkaloids	369.2	55.1	+	13.02	64460.8	61791.6	84270.3	96358.6	73597.4	52862.2	80863.3	55895.3	94216.6	49493.4	92091.9	96729	61709.3	92061.1
68136@[M+H]+@RANK1	Arecaidine	499-04-7	C10128	C7H11NO2	141.079	Alkaloids	142.1	96.1	+	1.54	11240.2	4759.73	24746.2	26387.5	47084.8	8824.92	16074	14012.4	11538.2	12840.6	12888.7	41242.9	18264	33184.2
64426@[M+H]+@RANK1	Pseudotropine	135-97-7	C02066	C8H15NO	141.115	Alkaloids	142.1	124.1	+	0.81	4334.29	1410.89	3003.34	3606.66	3669.59	2366.71	890.296	881.72	3550.6	1895.03	237.716	482.132	5962.9	1980.25
94882@[M+H]+@RANK1	Grossamide	80510-06-1		C36H36N2O8	624.247	Alkaloids	625.3	121.1	+	13.08	8649.65	6249.06	10415.8	13655.2	23532.2	21887	36983.4	46079.7	10071.5	13986.2	25281.5	15438.7	21265.7	28182.1
64449@[M+H]+@RANK1	Sparteine	90-39-1	C10783	C15H26N2	234.21	Alkaloids	235.2	219.2	+	8.06	2731.17		1808.25	1320.63	2706.21		4212.49	1454.76	816.746			924.172	2329.41	1419.62
68891@[M+H]+@RANK1	7-Ethyl-10-Hydroxycamptothecin	86639-52-3	C11173	C22H20N2O5	392.137	Alkaloids	393.1	263.1	+	6.28	1189.74	5109.08	8076.31	2804.54	4398.01	6358.51	796.29	1292.35	3807.33	410.972	1485.77	4685.54	4277.74	5270.75
68535@[M+H]+@RANK1	Vasicine	6159-55-3	C10733	C11H12N2O	188.095	Alkaloids	189.1	171.1	+	3.76	621640	825185	2.77044e+06	2.79392e+06	2.42241e+06	1.18438e+06	1.25812e+06	1.29514e+06	110484	107609	112809	1.2836e+06	1.32183e+06	1.14621e+06
73472@[M+H]+@RANK1	Nantenine	2565-01-07	C19985	C20H21NO4	339.147	Alkaloids	340.2	281.1	+	12.12	8981.22	16915.7	30028.5	5472.05		28441.6	37581.7	10546	6988.99	9738.43	43931.2	16519	20816.4	28980.7
65607@[M+H]+@RANK1	DL-Tyrosine	556-03-6	C01536	C9H11NO3	181.074	Alkaloids	182.1	136.1	+	1.9	871540	789651	3.59579e+06	4.19634e+06	2.72332e+06	485606	809181	736342	281852	269183	9584.04	1.84031e+06	1.97636e+06	1.10232e+06
67975@[M+H]+@RANK1	Huperzine B	103548-82-9	C09866	C16H20N2O	256.158	Alkaloids	257.2	198.1	+	3.83	9146.06	4819.3	4779.22	7339.69	6517.3	3701.75	6212.17	3357.32	2731.23	1866.56	2003.55	3930.26	4207.11	4928.83
63619@[M+NA]+@RANK1	Dhurrin	499-20-7	C05143	C14H17NO7	311.101	Alkaloids	334.1	123	+	13.33	54025.9	191215	74760.2	69516.4	327505	25603.2	34678.2	47554.7	33495.5	74826.1	22447.8	76866.1	71852	230354
64380@[M+H]+@RANK1	N-Methylcoclaurine	5096-70-8	C05243	C18H21NO3	299.152	Alkaloids	300.2	107	+	12.07	14338.2	7547.27	40636.4	31523.6	13263.8	40466.9	9287.17	13631.1	9669.47	8469.84	3594.36	20008.3	12653.6	14075.9
89360@[M+H]+@RANK1	3-(Carboxymethylamino)propanoic acid	505-72-6		C5H9NO4	147.053	Alkaloids	148.1	130.1	+	0.67	8562.14	6868.33	4736.48	4467.98	5516.69	11639.3	15048.7	9829.32	16667.1	6558.85	11161.7	6192.69	14244.9	10757.1
64376@[M+H]+@RANK1	Allocryptopine	24240-04-8_485-91-6	C02134	C21H23NO5	369.158	Alkaloids	370.2	324.2	+	13.59	106896	162802	6907.79	9677.94	207396	8041.36	255937	20201.5	3684.15	217731	45678.2	120683	115036	5476.31
87599@[M+H]+@RANK1	Calystegine A6	177794-04-6		C7H13NO3	159.09	Alkaloids	160.1	142.1	+	0.71	3469.01	9154.33	4388.55	5965.13	4408.23	503.829	1650.66	3300.08	3260.95	6787.15	2768.05	1645	4853.16	4981.5
91527@[M+H]+@RANK1	Calystegine A7	197565-90-5		C7H13NO3	159.09	Alkaloids	160.1	142.1	+	2.61	72216.1	94318.3	136591	116090	148864	332103	401648	338902	293798	228340	318754	69586.4	54773.4	33969.7
66971@[M+H]+@RANK1	Crotonoside	1818-71-9	C08432	C10H13N5O5	283.092	Alkaloids	284.1	152.1	+	2.4	1.7168e+06	1.835e+06	3.76894e+06	4.78643e+06	4.65124e+06	5.58995e+06	4.87367e+06	4.79722e+06	605579	447922	550637	7.73396e+06	5.25632e+06	3.39426e+06
67114@[M+H]+@RANK1	Denudatine	26166-37-0	C08680	C22H33NO2	343.251	Alkaloids	344.3	326.2	+	1.59	127797	139330	890171	708074	305500	209945	222709	294855	145308	135229	194529	551195	515730	319146
67132@[M+H]+@RANK1	Mesaconitine	2752-64-9	C08698	C33H45NO11	631.299	Alkaloids	632.3	105	+	12.92	4389.27	5035.24	5831.24	5972.45	3923.04	4983.79	5471.43	9710.61	5097.31	5398.56	10421.7	1928.68	4845.65	14289.2
67809@[M+H]+@RANK1	Liriodenine	475-75-2	C09567	C17H9NO3	275.058	Alkaloids	276.1	248.1	+	9.68	2844.99	1324.58	1450.82	414.52	613.952	525.835	434.161	2235.02	1152.61	972.345	423.5	824.722	647.256	426.45
68472@[M+H]+@RANK1	Deoxyvasicinone	530-53-0	C10659	C11H10N2O	186.079	Alkaloids	187.1	159.1	+	10.57	7177.87	1185.26	5081.13	4350.8	9479.07	1767.5	3493.49	1756	2879.74	6421.37	2692.44	3528.34	4077.42	2406.72
68212@[M+H]+@RANK1	Anacrotine	5096-49-1	C10277	C18H25NO6	351.168	Alkaloids	352.2	334.2	+	9.55	2283.93	2898.29	4737.12	3026.65	1965.8	2272.39	2226.61	1132.66	1147.35	6016.48	2494.22	5376.71	3765.57	3935.04
86199@[M+H]+@RANK1	Oxoglaucine	5574-24-3		C20H17NO5	351.111	Alkaloids	352.1	188.1	+	13.83	4060.89	5245.05	6397.97	3134.47	5705.81	2687.37	6792.59	4876.98	8295.56	5448.36	5991.83	3541.76	12100.7	6455.35
68213@[M+H]+@RANK1	Rivularine	723-78-4	C10278	C13H19NO3	237.136	Alkaloids	238.1	55.1	+	4.35	1153.12	2331.32	1812.29	4327.27	7401.75	1966.94	2459.31	3164.43	2907.26	2724.17	3693.62	6900.49	6760.28	2173.47
68288@[M+H]+@RANK1	Riddelline	23246-96-0	C10375	C18H23NO6	349.153	Alkaloids	350.2	332.1	+	13.66	101096	96362.4	80427.8	82608.8	79899.3	182304	103749	131735	258853	239860	307484	136024	137223	152907
68596@[M+H]+@RANK1	Sipeimine	61825-98-7	C10808	C27H43NO3	429.324	Alkaloids	430.3	394.3	+	13.04	7967.09	9566.06	19548.8	13041.1	5744.86	24406.8	32762.4	12771.9	25015.4	13482.5	27065.7	15151.5	29197.7	28653.1
89875@[M+H]+@RANK1	Beta-Solamarine	3671-38-3		C45H73NO15	867.498	Alkaloids	868.5	396.3	+	7.65	2598.35	4298.74	2817.06	3637.43	4033.62	6163.66		6682.41					6482.29
89874@[M+H]+@RANK1	Solamarine	20318-30-3		C45H73NO16	883.493	Alkaloids	884.5	396.3	+	7.68	5870.23	4296.57	31101.4	26227.8	39565.9	14231.1	15454.7	17711.8		5734.93	9348.72	11701.4	34137.4	21822.7
68631@[M+H]+@RANK1	Cochlearine	52418-07-2	C10853	C15H19NO3	261.136	Alkaloids	262.1	121	+	13.76	10365.7	10915.9	8022.75	7300.7	7971.07	8964.85	8390.19	9986.78	10808.9	12440.3	5187.54	15349.3	8884.33	16338.1
68881@[M+H]+@RANK1	Topotecan	123948-87-8	C11158	C23H23N3O5	421.164	Alkaloids	422.2	377.1	+	5.19	5456.38	4022.09	5318.5	4310.63	4959.95	2326.46	1758	2387.4	4115.41	1757.5	6555.1	1775		2359.85
69159@[M+H]+@RANK1	Tetrodotoxin	4368-28-9	C11692	C11H17N3O8	319.102	Alkaloids	320.1	302.1	+	12.98	15530	30002.6	4875.81	9385.83	25255.8	40769.3	26593.3	42643.5	17947.3	42932.1	23055.7	31521.5	14744.7	24010.8
281@[M+H]+@RANK1	Hypotaurine	300-84-5	C00519	C2H7NO2S	109.02	Alkaloids	110	65	+	2.24	4666.68	4699.4	7052.37	6115.32	11048.3	6151.88	6631.16	4491.62	3018.09	4769.8	8701.51	5567.82	7641.58	5621.42
5453@[M+H]+@RANK1	3-Methylindole	83-34-1	C08313	C9H9N	131.073	Alkaloids	132.1	130.1	+	3.81	671370	949313	3.04801e+06	2.79142e+06	2.82146e+06	1.22665e+06	1.30748e+06	1.25696e+06	101667	87649.4	112283	1.52744e+06	1.59728e+06	1.59509e+06
44430@[M+H]+@RANK1	Lupanine	550-90-3	C10772	C15H24N2O	248.189	Alkaloids	249.2	136.1	+	2.96	3180.85	1966.79	1837.99	624.011	929.529	1219.08	2370.29	3401.03	7501.65	3896.35	5301.5	2014.02	2140.83	885.78
68567@[M+H]+@RANK1	Matrine	519-02-8	C10774	C15H24N2O	248.189	Alkaloids	249.2	148.1	+	3.47	3055.46	4516.02	3709.23	1120.65	1768.43	1817.74	2725	612.027	5691.91	4699.46	3224.96	6278.95	2799.77	1998.75
68635@[M+H]+@RANK1	Darlingine	58471-10-6	C10857	C13H17NO2	219.126	Alkaloids	220.1	118.1	+	11.13	4597.32	13047.6	1238.76	1429.38	5094.33	7221.83	3873	4739.7	5785	2607.35	4688.59	1862	3166.47	2488.71
24111@[M+H]+@RANK1	Synephrine	1994-07-05	C04548	C9H13NO2	167.095	Alkaloids	168.1	150.1	+	2.63	19295.6	27019.2	14583.8	10467.9	10459	12765.5	24874.2	11403.6	18785.5	15691.2	32403.5	13287.7	11532.5	9918.54
36@[M+H]+@RANK1	beta-Alanine	107-95-9	C00099	C3H7NO2	89.0477	Alkaloids	90.1	45	+	0.64	21249.3	20918.4	25035.3	19037	21694.2	32147.8	38806	38176.9	36289	32116.5	35430.1	35031.8	36455	27371.9
7055@[M+H]+@RANK1	Hordenine	539-15-1	C06199	C10H15NO	165.115	Alkaloids	166.1	121.1	+	3.04	2559.66	1544.39	2296.34	18620.2	3516.8	1738.16	1996.64	4894.32	2852.11	1284.78	2993.15	2473.12	6600.28	1740.73
67543@[M+H]+@RANK1_71479@[M+H]+@RANK1	Rhynchophylline;Isorhyncophylline	76-66-4;6859-01-4	C09236;C16980	C22H28N2O4	384.205	Alkaloids	385.2	325.2	+	8.66	539.34	28376.5	1066.86	6433.8	4655.07	7061.85	1040.2	1554.84		1010.81	2656.79	3907.1	1056.86
64445@[M+H]+@RANK1_64446@[M+H]+@RANK1	Tropine acetate;3-Acetoxytropane	3423-27-6;3423-26-5	C12452;C12453	C10H17NO2	183.126	Alkaloids	184.1	124.1	+	3.24	12798.6	16416.3	22492.8	31592.4	19378.1	20638.1	26867.3	8719.66	19038.2	29107.2	29793.5	32951.8	29528.3	31118.8
68206@[M+H]+@RANK1_68308@[M+H]+@RANK1	Amabiline;Supinine	17958-43-9;551-58-6	C10263;C10403	C15H25NO4	283.178	Alkaloids	284.2	122.1	+	12.99	180370	207916	166555	219252	337239	300875	351473	243104	247662	170107	272670	227016	321771	355281
68278@[M+H]+@RANK1_68317@[M+H]+@RANK1	Retrorsine;Usaramine	480-54-6;15503-87-4	C10364;C10413	C18H25NO6	351.168	Alkaloids	352.2	334.2	+	0.72	9535		5691.75	11580.4	13962.6			57127.4		26924.9	29664.2		8267.49	17139.6
44763@[M+H]+@RANK1_66396@[M+H]+@RANK1	Isoquinoline;Quinoline	119-65-3;91-22-5	C06323;C06413	C9H7N	129.058	Alkaloids;Quinolines and derivatives	130.1	103.1	+	6.13	100382	95135	197376	190965	236308	103190	101655	133983	73500.3	62880.3	92546.7	187161	163677	132464
65735@[M+H]+@RANK1	4-Sulfobenzoate	636-78-2	C02236	C7H6O5S	201.994		203	157	+	4.68	32989.6	25367.2	19489.3	13304.8	14546.5	37872.7	26930.9	36292.2	13994.4	16936	13585.2	15164.8	15212.1	17101.5
58150@[M+H]+@RANK1	D-Proline	344-25-2	C00763	C5H9NO2	115.063	Carboxylic acids and derivatives	116.1	70.1	+	0.76	1.46916e+07	1.18762e+07	8.71784e+06	1.23338e+07	1.29111e+07	2.27804e+07	2.58928e+07	2.42715e+07	1.99887e+07	1.80767e+07	2.03637e+07	1.35319e+07	1.9371e+07	1.53726e+07
12@[M+H]+@RANK1	D-alpha-Aminobutyric acid	2623-91-8	C02261	C4H9NO2	103.063	Carboxylic acids and derivatives	104.1	58.1	+	0.65	5.35812e+07	5.58846e+07	7.3898e+07	8.82653e+07	1.03895e+08	8.68776e+07	9.4152e+07	9.55548e+07	7.74778e+07	6.76261e+07	8.11352e+07	7.86035e+07	1.07504e+08	9.62901e+07
69186@[M+H]+@RANK1	N-Ethylglycine	627-01-0	C11735	C4H9NO2	103.063	Carboxylic acids and derivatives	104.1	58.1	+	1.16	4.1461e+06	4.08298e+06	697322	8.7617e+06	8.66808e+06	7.91317e+06	7.84053e+06	8.22954e+06	585976	317850	456273	7.75697e+06	7.64009e+06	7.79907e+06
6377@[M+H]+@RANK1	Asp-Phe methyl ester_Aspartame	22839-47-0	C11045	C14H18N2O5	294.122	Carboxylic acids and derivatives	295.1	120.1	+	3.06	60203.4	54370.1	62643	71400.8	66794.7	116077	106962	111654	298875	305609	369956	103006	63081.2	58432.1
3511@[M+H]+@RANK1	S-Lactoylglutathione	41656-56-8	C03451	C13H21N3O8S	379.105	Carboxylic acids and derivatives	380.1	262.1	+	4.09	829.855	3487.67	4711.06	649.704	3834.28	2274.75	2007.67	1890.42	2093.14	6310.03	1700.82	1449.81	3189.53	2269.35
44784@[M+H]+@RANK1	N-Acetyl-L-histidine	2497-02-01	C02997	C8H11N3O3	197.08	Carboxylic acids and derivatives	198.1	110.1	+	0.77	30517.8	31217	74700.5	66997.5	69358.9	27313.7	45629.7	41585.1	41308.5	35853.8	45216.8	55856.9	11609	37036
63632@[M+H]+@RANK1	Pyrrolidonecarboxylic acid	4042-36-8	C02237	C5H7NO3	129.043	Carboxylic acids and derivatives	130	84	+	0.67	9.06997e+06	1.43513e+07	4.23978e+07	3.3716e+07	3.83099e+07	2.12382e+07	8.85175e+06	1.14577e+07	1.67387e+07	1.437e+07	1.89986e+07	1.58164e+07	1.63122e+07	1.31302e+07
43230@[M+H]+@RANK1	Lincomycin	154-21-2	C06812	C18H34N2O6S	406.214	Carboxylic acids and derivatives	407.2	126.1	+	12.44	35093.8	104837	56271	65185.3	71837.4	110295	77721.1	46094.8	9749.84	18676.7	48655.2	21128.5	151004	80761.7
65746@[M+H]+@RANK1	Hydroxypropanedioic acid	80-69-3	C02287	C3H4O5	120.006	Carboxylic acids and derivatives	121	103	+	2.77	203402	237581	298976	333680	317543	342841	290681	298976	145925	136130	102059	377993	381360	370879
45872@[M+H]+@RANK1	2-Aminomuconate semialdehyde	245128-91-0	C03824	C6H7NO3	141.043	Carboxylic acids and derivatives	142	96	+	1.19	24781.6	12479.6	23228.9	12255.4	19726.5	37555.6	30930.6	23488.7	22168.8	24501.4	22449.2	16122.7	28346.7	16866.3
7089@[M+H]+@RANK1	Proline betaine	471-87-4	C10172	C7H13NO2	143.095	Carboxylic acids and derivatives	144.1	41	+	0.74	30429.5	91232	123060	44565.8	103144	69235.9	35474.9	47081	205853	162217	231687	116203	189352	98975.5
62461@[M+H]+@RANK1	N2-gamma-Glutamylglutamine	1466-50-8	C05283	C10H17N3O6	275.112	Carboxylic acids and derivatives	276.1	213.1	+	2.42	2423.69	2310.93	862.687	2343.43	2923.86	1192.9	2296.64	2579	568.163	858.268	2459.37	1145.15	3149.1	3632.1
6891@[M+H]+@RANK1	NG,NG-Dimethylarginine dihydrochloride	220805-22-1_30315-93-6	C03626	C8H18N4O2	202.143	Carboxylic acids and derivatives	203.2	70.1	+	0.74	1.64752e+06	1.69867e+06	4.07194e+06	6.43883e+06	4.53783e+06	1.42448e+06	1366560	625018	1.45486e+06	1.10324e+06	1.64497e+06	3.0049e+06	3.93113e+06	3.4876e+06
72961@[M+H]+@RANK1	Ethyl acrylate	140-88-5	C19238	C5H8O2	100.052	Carboxylic acids and derivatives	101.1	55	+	1.74	65919.8	78207.7	133854	98778	104211	91632.9	114308	106193	63648.3	81465.4	74277.9	136118	107150	116607
63630@[M+H]+@RANK1	D-Glutamine	5959-95-5	C00819	C5H10N2O3	146.069	Carboxylic acids and derivatives	147.1	84	+	0.66	1.41796e+07	1.1675e+07	9.92997e+06	8.03568e+06	7.75281e+06	2.2436e+07	1.95515e+07	2.39469e+07	3.88973e+07	3.01744e+07	3.94173e+07	1.37027e+07	1.67048e+07	1.61134e+07
44142@[M+H]+@RANK1_63100@[M+H]+@RANK1	(2E)-Decenoyl-ACP;L-Pipecolic acid;Pipecolic acid	52-52-8;3105-95-1	C03969;C00408	C6H11NO2	129.079	Carboxylic acids and derivatives;Amino acid and derivatives	130.1	84.1	+	1.47	6101437	6.27111e+06	3.10062e+07	116082	2.98894e+07	8.50138e+06	1.11932e+07	3.19115e+06	1.32987e+06	472241	515055	1.35957e+07	96686.2	1.20683e+07
68842@[M+H]+@RANK1	5-Hydroxymethylfurfural	67-47-0	C11101	C6H6O3	126.032	Carbonyl compounds	127	53	+	2.95	9790.43	88048.5	38981	278414	306172	322847	285592	240899	18682.5	47081.1	7700.85	140726	200051	13659.2
413@[M-H]-@RANK1	D-Maltose	69-79-4	C00208	C12H22O11	342.116	Carbohydrates	341.1	59	-	0.76	105572	42332.9	89928.5	66366.9	96142.2	82753.6	95206.7	56128.6	83780.7	26387.1	26294	102987	402723	202795
64618@[M+NA]+@RANK1	L-Gulose	6027-89-0	C15923	C6H12O6	180.063	Carbohydrates	203.1	81.1	+	8.71	5107.23	5184.61	13506.5	10701.4	21590	10905.7	8706.33	19604.9	3415.57	1613.82	8537.71	9110.12	19221.1	22689.2
137@[M+NA]+@RANK1	Sucrose	57-50-1	C00089	C12H22O11	342.116	Carbohydrates	365.1	203.1	+	0.89	9.51083e+07	1.07396e+08	9.47662e+07	1.07932e+08	8.96892e+07	1.77811e+08	1.09548e+08	7.17311e+07	1.52343e+08	9.98489e+07	1.08711e+08	8.46297e+07	1.49832e+08	1.60308e+08
63099@[M+H-H2O]+@RANK1	D-Xylulose	551-84-8	C00310	C5H10O5	150.053	Carbohydrates	133.1	43	+	1.76	18413.8	20266.9	35936	37585.5	43379.1	27831.7	28399.7	37519.8	45829.4	38280.6	43540	41572	20974.5	31197.6
4199@[M+NA]+@RANK1	Maltotetraose	34612-38-9	C02052	C24H42O21	666.222	Carbohydrates	689.2	527.2	+	0.64	88030.9	217704	300129	397555	133913	10603.4	6451.92	10930.5	16114.8	28729.7	4287.92	585661	4509	2566.05
63216@[M+H]+@RANK1	Glucosamine	3416-24-8	C00329	C6H13NO5	179.079	Carbohydrates	180.1	162.1	+	2.6	2031.07	2701.15	2075.47	4716.21	1730.16	1683.02	2234.92	6452.92	705.705	2245.46	2166.25	1031.1	1017.83	2685.06
133@[M+H-H2O]+@RANK1_58151@[M+H-H2O]+@RANK1	alpha-D-Glucose;D-Tagatose	492-62-6;87-81-0	C00267;C00795	C6H12O6	180.063	Carbohydrates;Organooxygen compounds	163.1	85	+	0.76	227296	296489	396465	245819	676217	433737	577003	412420	537058	343239	467071	626145	612096	578741
3755@[M+H]+@RANK1_63118@[M+H]+@RANK1	Beta-D-Glucose;alpha-D-Glucose	492-61-5;492-62-6	C00221;C00267	C6H12O6	180.063	Organooxygen compounds	181.1	163.1	+	3.27	7545.99	8363.42	1813.59	1885.3	3814.91	7129.08	2922.89	2155.07	3272.95	1712.63	6421.43	4163.49	5943.34	8430.95
3585@[M+NA]+@RANK1	Maltotriose	1109-28-0	C01835	C18H32O16	504.169	Organooxygen compounds	527.2	365.1	+	1.23	2.8653e+06	3.71868e+06	1.3669e+07	1.70489e+07	1.41471e+07	3.70057e+06	5.26213e+06	5.18139e+06	1.69158e+06	2.0065e+06	4.70796e+06	1.02596e+07	8.58975e+06	1.28745e+07
44694@[M+NA]+@RANK1	1-Kestose	470-69-9	C03661	C18H32O16	504.169	Organooxygen compounds	527.2	203.1	+	0.74	127390	314210	910307	533958	284978	1.05389e+06	925168	1.02257e+06	240952	281705	173104	1.36457e+06	751886	458972
916@[M+NA]+@RANK1	Lactulose	4618-18-2	C07064	C12H22O11	342.116	Organooxygen compounds	365.1	203.1	+	0.77	9.51083e+07	1.04068e+08	3.49503e+07	8.11292e+07	1.62202e+08	1.10988e+08	6.17061e+07	5.56769e+07	9.03265e+07	4.90814e+07	5.93482e+07	5.52459e+07	1.49832e+08	4.92568e+07
6951@[M+NA]+@RANK1	Stachyose	10094-58-3_470-55-3	C01613	C24H42O21	666.222	Organooxygen compounds	689.2	527.2	+	0.73	88030.9	217704	300129	397555	133913	378966	629160	595272	124515	168549	101240	585661	760476	669504
62465@[M+H-H2O]+@RANK1	Kojibiose	2140-29-6	C19632	C12H22O11	342.116	Fatty Acyls	325.1	85	+	0.72	7.37987e+06	4.89605e+06	1.35018e+07	1.31587e+07	1.71228e+07	2.02558e+07	1.80402e+07	1.16056e+07	8.54815e+06	7.77437e+06	7.21592e+06	1.02431e+07	2.26127e+07	1.74763e+07
138@[M-H]-@RANK1	Raffinose	512-69-6	C00492	C18H32O16	504.169	Organooxygen compounds	503.2	89	-	1.31	67675.5	46834	215078	279306	500415		79521.2	63918.9	41324.6		43504.1	250020	316118	203270
66516@[M+H]+@RANK1	Quinic acid	877-95-2	C06746	C10H13NO	163.1	Organooxygen compounds	164.1	105.1	+	8.63	3095.54	3436.08	3568.35	4298.74	2087.27	3295.78	1484.76	4865.79	10060.2	9516.49	2445.73	3792.62	2601.61	986.28
58024@[M+H]+@RANK1	Aminomalonic acid	1068-84-4	C00872	C3H5NO4	119.022	Organic acids	120	74	+	0.65	56544.1	54062	60305	68475.6	94406	66935.8	94077.7	64295.4	76810.4	67191.4	56725.8	58311.5	72702.6	54616.8
6987@[M+H]+@RANK1	2-Hydroxyethanesulfonate	107-36-8	C05123	C2H6O4S	125.999	Organic acids	127	109	+	0.76	124225	111225	56686.3	84603.3	132256	97005.5	124077	109081	108001	68425.2	68179.2	84659.1	165192	140071
3231@[M+H]+@RANK1	Phosphoric acid	7664-38-2	C00009	H3O4P	97.9769	Organic acids	99	81	+	0.65	1.30903e+06	1.57346e+06	1.4302e+06	1.56268e+06	902404	969886	2.02822e+06	38867.6	2.14188e+06	1.64701e+06	2.17805e+06	76516.1	1.2295e+06	78265.9
35690@[M+H]+@RANK1	2-Hydroxybutanoic acid	3347-90-8	C05984	C4H8O3	104.047	Organic acids	105.1	59	+	0.64	1.63827e+06	1.71872e+06	2.60378e+06	3.18999e+06	3.54251e+06	2.93104e+06	2.73109e+06	3.2827e+06	2.80411e+06	2.44289e+06	2.54471e+06	2.82846e+06	2.98433e+06	3.48265e+06
4155@[M+H]+@RANK1	4-Guanidinobutyric acid	463-00-3	C01035	C5H11N3O2	145.085	Organic acids	146.1	86.1	+	1.31	24280	34573.8	57871.9	40207.2	41739.1	41211.9	38388	43873.9	39177.3	42635.3	34147.3	59794.3	42567.7	54309.2
63576@[M+H]+@RANK1	Phosphonoacetate	4408-78-0	C05682	C2H5O5P	139.987	Organic acids	141	95	+	1.88	6052.83	5893.8	21365.6	19873.3	26325.8	24310.4	21570.3	4661.84	20185.9	8327.83	11817.5	27613.2	15424.7	6496.12
75@[M+H]+@RANK1	5-Aminolevulinate	106-60-5	C00430	C5H9NO3	131.058	Organic acids	132.1	55	+	1.56	24162.2	29788.1	50789.1	56809.1	52595.7	35753.5	52155.5	46733	47342.9	29923.6	48240.5	42097.7	49497.3	41376
44803@[M+H]+@RANK1	2-Picolinic acid	14639-25-9_98-98-6	C10164	C6H5NO2	123.032	Organic acids	124	78	+	1.33	165764	115139	335876	371022	495527	399871	149325	325821	72423.3	230571	183351	398735	411469	545166
279@[M+H]+@RANK1	4-Aminobutanoic acid	1956-12-02	C00334	C4H9NO2	103.063	Organic acids and derivatives	104.1	69	+	0.66	19271.7	30173.1	33549	38726.6	48753	24946.9	20691	24784	38148.9	31622.8	44358.2	60891	39951.7	26312.3
3300@[M+H]+@RANK1	cis-Aconitic acid	499-12-7_585-84-2	C00417	C6H6O6	174.016	Organic acids and derivatives	175	69	+	1.46	1.11959e+06	1.41781e+06	4.19814e+06	4.84295e+06	4.6014e+06	3.33279e+06	2.65172e+06	3.32143e+06	1.07242e+06	909925	1.31179e+06	3.85739e+06	3.90948e+06	4.08687e+06
62815@[M+H]+@RANK1	2-Keto-6-acetamidocaproate		C05548	C8H13NO4	187.084	Keto acids and derivatives	188.1	100.1	+	1.48	9261.75	6722.27	18328	12391	15946.9	10658.9	16602.2	18092.7	16009.8	10965.9	12577	10846	11608.7	17164.8
58568@[M+H]+@RANK1	(S)-2-Acetolactate		C06010	C5H8O4	132.042	Keto acids and derivatives	133	87	+	1.32	61207.1	59350.5	71192.2	85349.4	92714.3	91751.3	100634	105106	154344	97041.8	129796	149036	156723	132517
5387@[M+H]+@RANK1_74939@[M+H]+@RANK1	3-Oxoadipic acid	689-31-6	C00846	C6H8O5	160.037	Keto acids and derivatives	161	125	+	2.83	5805.94	4105.72	1981.81	3850.4	3933.17	2060.38	4271.63	6234.56	2414.82	3275.52	1775.68	1408.05	3228.46	6260.49
214@[M]+@RANK1	Beta-Carotene	7235-40-7	C02094	C40H56	536.438	Vitamins	536.4	444.4	+	13.59	1935.41	2730.56	2325.15	1002.78	1480.62	2743.31	4395.76	1302.24	1806.54	1431.6	1098.78	665.723	2587.68	1256.67
215@[M+H-H2O]+@RANK1	Vitamin A	68-26-8_11103-57-4	C00473	C20H30O	286.23	Vitamins	269.2	93.1	+	9.86	7275.64	7834.81	11942.6	26895.1	11073.4	10902.7	9390.23	24229.8	3990.55	6676.01	2455.82	27641.2	18472	25802.5
2202@[M+H]+@RANK1	Pyridoxine	65-23-6	C00314	C8H11NO3	169.074	Vitamins	170.1	134.1	+	1.55	5697.11	9028.03	22601.6	20484.8	17833	15980	19432.6	15845.5	10717	2905.5	14745.4	17261.3	20805.1	23180.1
229@[M+H]+@RANK1	Thiamine	59-43-8	C00378	C12H16N4OS	264.104	Vitamins	265.1	122.1	+	0.7	9771.03	34413.8	26109.9	143353	54152.9	20806	21423.7	7800	19522.5	5505	17081.6	68836.9	35026.1	22989.8
233@[M+H]+@RANK1	Riboflavine	83-88-5	C00255	C17H20N4O6	376.138	Vitamins	377.1	243.1	+	5.06	50306.1	40796.7	138060	86941.4	41091.5	67824.5	49492.8	63789.3	16358.3	21228.4	17718.9	106618	74093.8	160546
249@[M+H]+@RANK1	Ascorbic acid	50-81-7	C00072	C6H8O6	176.032	Vitamins	177	95	+	1.13	358097	423123	31863.5	74964.3	86074.1	1.22073e+06	1.37643e+06	1.35153e+06	1.13167e+06	880923	1.13313e+06	105885	446797	701980
58552@[M+H]+@RANK1	Nicotinate ribonucleoside		C05841	C11H13NO6	255.074	Nicotinic acid derivatives	256.1	124	+	4.55	62591.1	89145.8	218421	268809	247247	95871.8	93083.6	82153.5	56094.5	60463.4	99268.1	138047	152374	148252
240@[M+H]+@RANK1	Nicotinic acid	59-67-6	C00253	C6H5NO2	123.032	Nicotinic acid derivatives	124	78	+	0.73	176071	179087	446429	474889	437190	216738	234235	238418	169649	179564	197046	392765	433054	326125
65745@[M+H]+@RANK1	3,4-Dihydrocoumarin	119-84-6	C02274	C9H8O2	148.052	Coumarins	149.1	105.1	+	6.68	51933.1	18047.7	164379	44519.5	40305.3	39521.7	32148	28623.8	25071.6	22765.3	27852.6	26883.6	30309.9	21401.7
43733@[M+H]+@RANK1	Isobergapten	482-48-4	C18082	C12H8O4	216.042	Coumarins	217	202	+	9.94	2622.44	6680.18	7635	4973.16	3942.95	5977.46	3642.75	8629.67	2793.22	2361.5	3154.31	4733.82	3288.46	4812.2
96421@[M+H]+@RANK1	Mellein	480-33-1		C10H10O3	178.063	Coumarins	179.1	161.1	+	6.45	5999.3	4514.99	1805.06	2640.03	2571.14	9845.33	4700.52	7223.06	6912.99	2429.35	2914.96	5611.94	4625.02	4426.17
4091@[M+H]+@RANK1	7-Ethoxycoumarin	31005-02-4	C11052	C11H10O3	190.063	Coumarins	191.1	163	+	10.57	9720.88	9835.11	6675.79	16929.8	18319.2	11821.3	9565.63	4661.17	4668.58	5547.21	14550.9	8489.96	10321.2	3520.33
67387@[M+H]+@RANK1	Alloimperatorin	642-05-7	C09053	C16H14O4	270.089	Coumarins	271.1	55.1	+	8.83	20432.1	10126.4	11348.5	16099.1	12557.5	14239.4	10247.9	12599.8	18036.5	10123.6	16199.2	10643	14059.9	9890.82
48321@[M+H]+@RANK1	Psoralidin	18642-23-4	C10523	C20H16O5	336.1	Coumarins	337.1	55.1	+	11.8	126321	252120	534183	973229	326733	696593	375398	763839	361515	392653	298367	424716	537301	427003
93893@[M+H]+@RANK1	8-Geranyloxypsoralen	7437-55-0		C21H22O4	338.152	Coumarins	339.2	55.1	+	13.29	4.52516e+06	5.26144e+06	8.34148e+06	5.46163e+06	4.55735e+06	4.13758e+06	4.70355e+06	5.05193e+06	5.48378e+06	5.24642e+06	4.21108e+06	5.00843e+06	5.56626e+06	2.19487e+06
73565@[M+H]+@RANK1	Bergamotine	7380-40-7	C22152	C21H22O4	338.152	Coumarins	339.2	203	+	13.03	72820.2	77919.9	121723	125629	167226	198117	112356	130656	111317	113142	123949	125378	64146.7	141704
67479@[M+H]+@RANK1	Chalepensin	13164-03-9	C09165	C16H14O3	254.094	Coumarins	255.1	69.1	+	7.62	4710.48	7167.23	5493.73	10637.5	3946.2	5826.65	6778.17	9082.42	5703.01	8170.37	3238.93	8889.45	4289.15	9864.62
71739@[M+H]+@RANK1	Notopterol	88206-46-6	C17499	C21H22O5	354.147	Coumarins	355.2	55.1	+	11.94	61752.2	39201.7	156340	194680	160163	93833.1	90358.2	83779.2	189721	204069	225934	128698	107509	121383
43364@[M+H]+@RANK1	Trioxsalen	3902-71-4	C09314	C14H12O3	228.079	Coumarins	229.1	141.1	+	11.65	11982.8	10123.3	19328.6	19229.5		7378.83	20040.7	11391.6	6466.5	7386.45	5906.63	12002.3	8796.04	10474.9
90235@[M+H]+@RANK1	Lansiumarin A	205115-73-7		C21H20O5	352.131	Coumarins	353.1	69	+	11.65	59025	77367.3	263162	220272	221810	218934	121241	229440	258198	241134	179941	361995	149526	212550
67525@[M+H]+@RANK1	Daphnoretin	2034-69-7	C09216	C19H12O7	352.058	Coumarins	353.1	163	+	11.45	154322	220801	478077	588862	697558	754029	347994	430362	339636	623142	384355	604913	389255	379561
6512@[M+H]+@RANK1	3-Hydroxycoumarin	939-19-5		C9H6O3	162.032	Coumarins	163	107	+	9.94	4063.63	8508.61	8633.29	12608.4	27157.1	8776.67	16731.5	14340.4	7251.04	9627.6	11893.9	22329.1	7155.59	6594.37
66058@[M+H]+@RANK1	4-Methylumbelliferyl acetate	2747-05-09	C03837	C12H10O4	218.058	Coumarins	219.1	159	+	10.06	9250.04	4112.8	16228.9	9638.11	26594.6	5279.34	6431.67	10657.5	6610.6	11523.1	4198.88	7543.91	7119.2	9436.88
67595@[M+H]+@RANK1	Scoparone	120-08-1	C09311	C11H10O4	206.058	Coumarins	207.1	121	+	5.06	31636	9001.9	70442.9	67257	75561.8	21478.3	18099.5	35514.7	48655.3	30007	44436.5	37897.3	34479.2	44806.4
44040@[M+H]+@RANK1	(+)-Pteryxin	17944-23-9_13161-75-6	C09307	C21H22O7	386.137	Coumarins	387.1	55.1	+	11.11	10915.8	11559.8	18674.3	8549.82	35020.3	22153.6	18183.8	33299.2	19445.1	23312.3	24816.3	28856.7	31806.8	31287.3
68012@[M+H]+@RANK1	Cleomiscosin A	76948-72-6	C09922	C20H18O8	386.1	Coumarins	387.1	137.1	+	5.74	2109.73	5295.21	15604.4	8720.45	12525.3	10028.2	9759.76	10430.6	10009.1	5279.83	13493.4	9344.65	6500.43	6673.16
67568@[M+H]+@RANK1	Luvangetin	483-92-1	C09273	C15H14O4	258.089	Coumarins	259.1	203	+	4.48	3233.31	9226.42	3928.79	2523.32	4187.8	2983.3	3651.22	3043.28	2796.35	1338.24	3344.78	1637.46	4649.48	3402.87
71470@[M+H]+@RANK1	Neoglycyrol	23013-84-5	C16968	C21H18O6	366.11	Coumarins	367.1	55.1	+	13.9	11982.8	50338.6	8292.12	15661.8	6594.2	24100.5	103330	102756	15486.5	11031.8	99097.2	6370.6	15833.1	8551.6
48365@[M+H]+@RANK1	Dalbergin	482-83-7	C10414	C16H12O4	268.074	Coumarins	269.1	241.1	+	9.86	1947.43	1981.59	4118.87	3953.46	5496.78	10258.3	6487.71	3518.18	1834.5	3235.83	5817.77	5240.33	6242.49	6782.08
91681@[M+H]+@RANK1	8-Hydroxybergapten	1603-47-0		C12H8O5	232.037	Coumarins	233	205.1	+	10.56	135732	39220.3	3470.5	13521.1	33909.6	11464	39124.6	79215.2	9590.09	68973.3	40643.4	9923.62	14429.6	14481.7
43808@[M+H]+@RANK1	Herniarin	531-59-9	C09268	C10H8O3	176.047	Coumarins	177.1	121.1	+	7.69	7809.61	7135.2	8919.7	10531.5	17513.1	8427.47	11475.2	8641.08	2929.36	9804.45	10394.4	14980.8	11332.3	18460
65904@[M+H]+@RANK1	4-Methylumbelliferone	90-33-5	C03081	C10H8O3	176.047	Coumarins	177.1	149.1	+	7.26	108754	126682	355425	381408	438786	195236	166407	173146	57824.8	48785.3	54957.1	334785	322472	281561
67558@[M+H]+@RANK1_88853@[M+H]+@RANK1_95148@[M+H]+@RANK1	Decursin;5-Geranoxy-7-methoxycoumarin;Decursinol angelate	5928-25-6;7380-39-4;130848-06-5	C09258	C19H20O5;C20H24O4	328.131	Coumarins	329.133	175	+	13.78	6563.77	11270.4	9538.18	5588.9	12900.6	5418.21	17186.6	11699.4	4472.32	9105.04	8558.76	5123.4	11512.6	4565.19
91659@[M+H]+@RANK1	Beta-mangostin	20931-37-7		C25H28O6	424.189	Xanthones	425.2	69.1	+	13.21	88364	92996.5	120308	118189	101713	89131.7	106011	104294	120157	147765	95899.7	108375	137599	56468.5
88036@[M+H]+@RANK1	9-Hydroxycalabaxanthone	35349-68-9		C24H24O6	408.157	Xanthones	409.2	55.1	+	13.29	45176.8	48457.6	74356.2	79724.5	65752.8	60195.5	46358.5	51009.1	72786.3	36763.3	70391.4	52336.2	23333.5	42742.3
68097@[M+H]+@RANK1	Bellidifolin	2798-25-6	C10053	C14H10O6	274.048	Xanthones	275.1	257	+	12.05	9794.78	30258.7	37716.8	15836.7	45006.5	31501.6	36338.2	40959.9	12499.1	8160.41	30638.6	23189.4	55590.6	32603.4
95661@[M+H]+@RANK1	1,3,6-Trihydroxy-5-methoxyxanthone	41357-84-0		C14H10O6	274.048	Xanthones	275.1	257	+	12.08	9794.78	30258.7	37716.8	15836.7	45006.5	18902	36338.2	40959.9	12499.1	8160.41	30638.6	23189.4	55590.6	17765.6
68114@[M+H]+@RANK1	Lancerin	81991-99-3	C10075	C19H18O10	406.09	Xanthones	407.1	389.1	+	11.47	20112.3	10636.3	34300.8	29146.4	56864.4	43647.1	53231.6	29872.2	41367.8	27343.5	31374	43216.5	39173.8	42809
44383@[M+H]+@RANK1	alpha-Mangostin	6147-11-01	C10080	C24H26O6	410.173	Xanthones	411.2	355.1	+	12.31	16916.1	2695.13	3952.46	13879.2	13208.9		2229	9442.62	5407.56	5445.22	3985.8	6122.82	3826.6	8162.74
68112@[M+H]+@RANK1	1-Isomangostin	19275-44-6	C10071	C24H26O6	410.173	Xanthones	411.2	55.1	+	13.16	19538.3	17957.8	14649.5	11552.7	8104.55	12893.4	11311.5	24020.1	9995.13	14283.5	15728.5	15346	6488.85	8510.3
95905@[M+H]+@RANK1	3-Isomangostin	19275-46-8		C24H26O6	410.173	Xanthones	411.2	55.1	+	13.09	19538.3	6354.72	10543.3	7432.05	8273.29	14415.7	9135.23	12428.6	6172.45	14283.5	15728.5	12155.3	6488.85	7914.44
68100@[M+H]+@RANK1	Desmethylbellidifolin	2980-32-7	C10056	C13H8O6	260.032	Xanthones	261	243	+	9.97	3004.84	898.207	3909.1	2666.55	3482.09	1682.1	4505.81	6116.61	4308.81	937.664	1494.58	1079.02	1459.14	4597.12
68111@[M+H]+@RANK1	Isogentisin	491-64-5	C10070	C14H10O5	258.053	Xanthones	259.1	241.1	+	7.75	2544.17	4097.76	2765.9	4765.51	8219.44	2880.98	2990.44	3368.07	4740.12	1715.66	3758	2120.98	6422.38	5923.5
68121@[M+H]+@RANK1	Norlichexanthone	20716-98-7	C10087	C14H10O5	258.053	Xanthones	259.1	241.1	+	4.48	2473.91	2210.81	4226.5	5479.89	4772.02	5340.72	3618.61	4960.32	1582.56	1361.9	2943.31	4958.84	4075.51	4465.8
86638@[M+H]+@RANK1	1-Isomangostin hydrate	26063-95-6		C24H28O7	428.184	Xanthones	429.2	355.1	+	13.5	2455.6	4420.64	3826.84	5671.98	2598.16	3227.74	2445.3	8192.72	5519.18	6338.82	3822.94	4049.86	3898.23	3624.35
89181@[M+H]+@RANK1	Garcinone D	107390-08-9		C24H28O7	428.184	Xanthones	429.2	411.2	+	13.56	16337.9	17282.3	14086.6	17809.6	28320.8	41205.6	28415	24624.8	26734.9	26743.7	11228.9	19732.7	52993	17924.2
68107@[M+H]+@RANK1_68128@[M+H]+@RANK1	Gentisein;1,3,5-Trihydroxyxanthone	529-49-7;6732-85-0	C10065;C10094	C13H8O5	244.037	Xanthones	245	135	+	8.73	2308.15	12940.2	1164.92	8060.91	2904.42	3085.77	5582.91	1769	1171.92	1125.23	1174.59	1768.49	2894.17	2228.11
STD_22059-21-8@+@RANK1	1-Aminocyclopropanecarboxylic acid	22059-21-8		C4H7NO2	101.048	phytohormone	102	56	+	0.7	33245.1	50845.9	970887	74222.3	818352	79387.3	81527.6	72732.8	125275	72028.8	76525.5	56074.5	92307.3	69582.5
STD_39924-52-2@+@RANK1	Methyl jasmonate	39924-52-2	C11512	C13H20O3	224.141	phytohormone	225	151	+	11.3	18472.3	59123.7	31553	55353	54808.1	60622.2	102402	63548.6	45255.3	102441	26641.5	119565	70767.5	72512.3
STD_487-89-8@+@RANK1	Indole-3-carboxaldehyde	487-89-8	C08493	C9H7NO	145.053	phytohormone	146	118	+	6.73	58187.5	44785.7	126309	183998	116612	51095.9	82957.3	79861.5	60684.7	27335.8	39285.1	104574	79326.7	77984.3
STD_133-32-4@+@RANK1	3-Indolebutyric acid	133-32-4	C11284	C12H13NO2	203.095	phytohormone	204	186	+	9	21588.3	22896.8	19826.1	15573.5	12568	18626.1	12871.9	16068.4	15548	31910.2	34751.9	22744.1	36992.7	15539.2
STD_1637-39-4@+@RANK1	trans-Zeatin	1637-39-4	C00371	C10H13N5O	219.112	phytohormone	220	136	+	3.41	941.535	1959.34	4462.87	3797.65	3337.99	6077.24	4850.64	2974.14	7352.5	12881.1	6248.25	3929.51	4548.99	3795.54
STD_32771-64-5@+@RANK1	cis-Zeatin	32771-64-5	C15545	C10H13N5O	219.112	phytohormone	220	136	+	3.6	1696.5	2165.67	3127.58	4153.42	2015.02	5438.09	2209.48	1890.94	5720.23	2112.32	2651.55	5925.43	2785.32	2806.3
STD_7724-76-7@+@RANK1	N6-isopentenyladenosine	7724-76-7		C15H21N5O4	335.159	phytohormone	336	204	+	6.1	18613.4	14843.1	39938.9	20518.8	26325.8	36965.3	47924.4	42665.3	12643.1	7781.7	5834.03	63198.6	41504.7	36470.5
STD_6025-53-2@+@RANK1	trans-Zeatin-riboside	6025-53-2	C16431	C15H21N5O5	351.154	phytohormone	352	220	+	4.31	10817.4	20090.8	14991.6	12191.1	17852.5	49829.5	53369.9	41831.3	50141.5	51224.5	41713.5	53085.2	42083.9	37277.1
STD_72962-43-7@+@RANK1	Brassinolide	72962-43-7	C08814	C28H48O6	480.345	phytohormone	481	315	+	11.26	10462.8	5097.45	7655.99	3083.95	16998.8	50259	3485.39	6818.03	1374.69		7740.52	10482.1	6437.05	2542.7
64468@[M+H]+@RANK1	Leukoaminochrome	29539-03-5	C17756	C8H9NO2	151.063	Indoles and derivatives	152.1	80	+	2.42	92157.8	103399	203300	203374	218571	260342	273063	254816	45302.1	31215.8	27975.9	396030	302391	214779
58201@[M+H]+@RANK1	Leucodopachrome	18766-67-1	C05604	C9H9NO4	195.053	Indoles and derivatives	196.1	150.1	+	4.82	27544.2	36927.8	23693.3	38237.3	29809.3	40602.6	19405.8	25219.8	17017	18575.4	22483.8	32042.2	40041.1	34422.7
7016@[M+H]+@RANK1	Methoxyindoleacetic acid	3471-31-6	C05660	C11H11NO3	205.074	Indoles and derivatives	206.1	160.1	+	3.76	249301	318964	1.12058e+06	1.09138e+06	1.28299e+06	435366	462504	567477	46695.2	37482.7	41292.6	529467	660452	555529
68870@[M+H]+@RANK1	1H-Indole-2,3-dione	91-56-5	C11129	C8H5NO2	147.032	Indoles and derivatives	148	120	+	2.79	4749.07	6769.17	5190.1	12421.4	10355	6636	5129.87	14008.3	10674.2	4712.94	5725.42	4983.72	5634.96	4956.28
7009@[M+H]+@RANK1	5,6-Dihydroxyindole	3131-52-0	C05578	C8H7NO2	149.048	Indoles and derivatives	150.1	78	+	6.68	3840.07	38525.4	6751.8	6398.94	15194.7	7731.35	11030	42010.4	9137.28	6146.9	9701.08	4525.42	6119.56	14999.9
63360@[M+H]+@RANK1	12-OPDA	85551-10-6	C01226	C18H28O3	292.204	Fatty Acyls	293.2	275.2	+	11.4	27568.9	37556.8	51948.9	56580.9	80987.4	56648.5	32122.8	34170.1	36616.3	33614.4	22091.3	97456.7	36276.5	27382.3
3280@[M+H]+@RANK1	Pimelic acid	111-16-0	C02656	C7H12O4	160.074	Fatty Acyls	161.1	69.1	+	0.55	1.30076e+06	1.56386e+06	1.3647e+06	1.57867e+06	1.59598e+06	2.08122e+06	2.57972e+06	2.52659e+06	2.61655e+06	2.17916e+06	3.21785e+06	1.45218e+06	1.87817e+06	1.923e+06
35860@[M+H]+@RANK1	9-OxoODE	54232-59-6	C14766	C18H30O3	294.219	Fatty Acyls	295.2	277.2	+	11.98	91500	129525	460498	534230	441851	353419	475880	306471	37620.1	15894.2	45770.3	330190	120875	117699
36019@[M+H-H2O]+@RANK1	(10E,12Z)-(9S)-9-Hydroperoxyoctadeca-10,12-dienoic acid	29774-12-7	C14827	C18H32O4	312.23	Fatty Acyls	295.2	55.1	+	11.96	280931	203237	621778	693657	1.24312e+06	946267	783327	598284	206778	147476	81981.3	716286	725599	288689
36769@[M+H]+@RANK1	Colneleate	52761-34-9	C19827	C18H30O3	294.219	Fatty Acyls	295.2	123.1	+	11.97	148970	95396.3	407179	136118	444082	328425	295830	358326	42649	71319.6	77652.9	679737	204693	160139
34494@[M+H]+@RANK1	Octadecanamide	124-26-5	C13846	C18H37NO	283.288	Fatty Acyls	284.3	43.1	+	13.02	244879	243188	452690	407852	466481	409754	458065	423738	446974	275448	448512	326307	454632	478640
3843@[M+H]+@RANK1	20-HETE	79551-86-3	C14748	C20H32O3	320.235	Fatty Acyls	321.2	91.1	+	13.28	77600.5	62369.9	104322	97745.2	65272.7	68843.9	65725.7	80545.1	44491.2	79413.4	52967	71013.5	77121.9	21017.6
3457@[M+H]+@RANK1	Docosahexaenoic acid	6217-54-5	C06429	C22H32O2	328.24	Fatty Acyls	329.2	93.1	+	12.6	12826.5	12414.9	23842	43305.8	26430.1	21983.5	32628.6	8827.33	25885.2	15352.3	18736.8	15902.3	40417.7	14832.2
35697@[M+NA]+@RANK1	9,10-DHOME	263399-34-4	C14828	C18H34O4	314.246	Fatty Acyls	337.2	43	+	13.3	76465.6	67901	104099	103925	117652	105761	164031	124045	43152	128495	75667.2	126642	124413	70546
3555@[M+H]+@RANK1	Erucic acid	112-86-7	C08316	C22H42O2	338.318	Fatty Acyls	339.3	57.1	+	13.28	5.73149e+06	5.47569e+06	9.63528e+06	7.85697e+06	6.09421e+06	7.93642e+06	5.88026e+06	8.08628e+06	7.1059e+06	7.18846e+06	7.79461e+06	7.44646e+06	6.49216e+06	3.32227e+06
3832@[M+H]+@RANK1	5,6-DHET	213382-49-1	C14772	C20H34O4	338.246	Fatty Acyls	339.3	303.2	+	13.03	31652	28289.2	34614.6	22456.7	46050.1	90224.5	68046.1	66127.1	38844.4	39644	46537.8	45570.1	62214.7	57579.1
3833@[M+H]+@RANK1	8,9-DiHETrE	192461-96-4	C14773	C20H34O4	338.246	Fatty Acyls	339.3	95.1	+	13.03	962737	1.14429e+06	1.26704e+06	1.07402e+06	5.26775e+06	2.60009e+06	2.11146e+06	2.42244e+06	5.27706e+06	6.67966e+06	2.3971e+06	5.58496e+06	2.28723e+06	2.04802e+06
35389@[M+H]+@RANK1	13(S)-HPOT	67597-26-6	C04785	C18H30O4	310.214	Fatty acyls	311.2	69.1	+	11.47	48758.4	69949.4	131554	198554	204759	97467.1	61326.8	85563.9	37342.5	9610.04	14383.4	108926	97377	36725.2
4159@[M+H]+@RANK1	4-Hydroxybutanoic acid	591-81-1	C00989	C4H8O3	104.047	Fatty Acyls	105.1	87	+	0.64	11672	22359.5	11235.7	13577.2	9510.64	13017.7	11556.8	8058.15	9067	13844.6	8778.06	5775.9	13725.8	12203.5
35698@[M+H]+@RANK1	12,13-DHOME	263399-35-5	C14829	C18H34O4	314.246	Fatty Acyls	315.3	71.1	+	11.88	19024.5	14785.5	25944.3	17209.8	25710	26219.8	11659.2	27513.3	10041.3	17733.6	44092.4	24092.3	15689.9	37559.5
3600@[M+H]+@RANK1	Leukotriene F4	83851-42-7	C06462	C28H44N2O8S	568.282	Fatty Acyls	569.3	189.2	+	11.17	3571.34	4284.55	13235.3	33061.3	7326.34	7148.3	20256.3	7299.97	3973	1956	12366.1	16167.7	7401.93	8445.39
36155@[M+H]+@RANK1	Prostaglandin I2	35121-78-9	C01312	C20H32O5	352.225	Fatty Acyls	353.2	317.2	+	9.39	26583.8	28643.9	93231.2	81783.3	65432.7	28694.3	27554.2	33514.3	11464.8	10490.4	7611.04	171853	56342.7	22177.7
36247@[M+NA]+@RANK1	20-COOH-Leukotriene B4	80434-82-8	C05950	C20H30O6	366.204	Fatty Acyls	389.2	371.2	+	11.57	8102.24	11604.7	4503	9557.81	15594.1	15400.9	19485	12785.9	10179.7	22894.8	17328.8	16715.7	11793.9	21825
62463@[M+NA]+@RANK1	Turanose	547-25-1	C19636	C12H22O11	342.116	Fatty Acyls	365.1	203.1	+	0.79	9.51083e+07	1.04068e+08	9.62942e+07	8.11292e+07	1.62202e+08	1.10988e+08	6.17061e+07	5.56769e+07	9.03265e+07	4.90814e+07	5.93482e+07	8.46297e+07	1.49832e+08	4.92568e+07
69649@[M+H]+@RANK1	Lubiprostone	136790-76-6_333963-40-9	C13707	C20H32F2O5	390.222	Fatty Acyls	391.2	149	+	12.75	9.03678e+06	7.8804e+06	9.77916e+06	1.0818e+07	7.95141e+06	9.7366e+06	9.15616e+06	8.60649e+06	9.76977e+06	9.91415e+06	8.5831e+06	9.95197e+06	1.00637e+07	6.30814e+06
63352@[M+H]+@RANK1	12(13)-EpOME	948310-68-7	C14826	C18H32O3	296.235	Fatty Acyls	297.2	279.2	+	11.88	23513.9	12283.5	33883.2	13640.7	20320.5	14962.6	15024.7	14972.5	49682.1	5952.31	5432.86	15003.6	19386.4	11108.3
189@[M+H]+@RANK1	Stearic Acid	1957-11-04	C01530	C18H36O2	284.272	Fatty Acyls	285.3	57.1	+	13.02	43653.1	55687.1	62253.8	64479.7	96524.6	78629.9	74909.9	72386	56185.4	58378.3	62390.1	68497.1	82584	80859.1
956@[M+H]+@RANK1	L-Acetylcarnitine	5080-50-2	C02571	C9H17NO4	203.116	Fatty Acyls	204.1	85	+	0.69	6938.28	29616.7	73201.5	64104.1	41470.7	27037.8	38242.8	26423.7	25965.7	75482.8	28981.8	27853.3	45511.8	58089.1
3449@[M+H]+@RANK1	Leukotriene A4	72059-45-1	C00909	C20H30O3	318.219	Fatty Acyls	319.2	301.2	+	5.57	3741.99	3268.72		3237.64	1020.49	4425.28		2020.11	6333.37	3549.22		4920.15	3483.4	995.841
3926@[M+H]+@RANK1	6-Aminocaproic acid	60-32-2	C02378	C6H13NO2	131.095	Fatty Acyls	132.1	41	+	1.84	190526	206093	326523	289675	360060	372622	355885	361138	591577	417089	604683	336804	340421	321736
24063@[M+NA]+@RANK1	Bovinic acid	2540-56-9	C04056	C18H32O2	280.24	Fatty Acyls	303.2	183	+	6.86	917.193	6154.01	1198.27	1556.21	4666.91	3809	2316.88	7838.37	8758.51	6455.33	2952.85	5059.75	7363.56	8605.79
62819@[M+H]+@RANK1	3-Isopropylmalate	921-28-8	C04411	C7H12O5	176.068	Fatty Acyls	177.1	131.1	+	10.79	34730.3	24949.1	26190.3	18102.3	17561.8	21136.7	18154.7	21072.7	18337.5	13455.8	40978.8	23633.8	21596	38214.6
190@[M+H]+@RANK1_3407@[M+H]+@RANK1_3553@[M+H]+@RANK1	Oleic acid;Vaccenic acid;Petroselinic acid	112-80-1;693-72-1;593-39-5	C00712;C08367;C08363	C18H34O2	282.256	Fatty Acyls	283.3	57.1	+	13.03	4.67515e+06	4.28692e+06	6.96847e+06	7.45385e+06	9.78354e+06	9.69863e+06	8.93518e+06	5.70812e+06	6.71092e+06	4.64644e+06	9.17117e+06	9.29698e+06	7.49931e+06	9.92719e+06
44724@[M+H]+@RANK1	4-Isopropylbenzoic acid	536-66-3	C06578	C10H12O2	164.084	Prenol lipids	165.1	119.1	+	9	6150.02	16957.6	14193.7	14379.6	14011.5	9927.33	18558.6	9438.2	9951.36	10730	8808.35	23450.1	6917.38	9614.08
67890@[M+H]+@RANK1	Lactaroviolin	85-33-6	C09696	C15H14O	210.104	Prenol lipids	211.1	193.1	+	10.51	6599.43	9027.75	4743.48	1760	1223.95	2366.74	15316.6	3296.83	3464	7041.12	7784.53	3638	3496	1465.79
71741@[M+H]+@RANK1	Cyperotundone		C17501	C15H22O	218.167	Prenol lipids	219.2	147.1	+	11.13	48329.9	37665.7	19794.4	64614.2	26019.8	46506.4	70473.5	34320.8	53950.1	89549.2	52926.6	33175.8	17041.1	42527.8
41460@[M+H]+@RANK1	Norbixin	542-40-5	C08608	C24H28O4	380.199	Prenol lipids	381.2	345.2	+	9.84	2328.24	3895.12	1932.87	3808.1	1753.39	4404.01	3874.44	3233.89	2227.56	2187.07	1289.7	6187.7	1769.71	1599.53
41491@[M+H]+@RANK1	Lutein	127-40-2	C08601	C40H56O2	568.428	Prenol lipids	569.4	533.4	+	13.14	5210.55	7834.55	8784.19	24375.5	12522.8	15187.4	16595.3	13833.1	6506.33	7651.46	3177.12	11339.1	12861.5	9915.99
41502@[M+H]+@RANK1	Vitamin A2 aldehyde	472-87-7	C05918	C20H26O	282.198	Prenol lipids	283.2	173.1	+	11.25	19590.6	27898.1	21166.4	28899.2	17311.6	29390.4	13335.1	18339.3	20279.6	16831	17611.9	27187.1	21095.5	10190.8
67886@[M+H]+@RANK1	alpha-Irone	79-69-6_35124-13-1	C09690	C14H22O	206.167	Prenol lipids	207.2	147.1	+	5.05	26531.8	44153.4	107918	47302.2	120031	88595.3	41508.4	72547.9	19122.9	17304.3	37792.8	87239.4	85981.6	104994
69413@[M+H]+@RANK1	beta-Ionone	79-77-6	C12287	C13H20O	192.151	Prenol lipids	193.2	55.1	+	11.23	13499	5457.32	9285.15	10202.8	12403.5	8293.16	8039.64	28107.7	10620.5	8218.33	11014.3	15035	11098.3	10701.8
2276@[M+H]+@RANK1_41512@[M+H]+@RANK1	Retinal;9-cis-Retinal	116-31-4;514-85-2	C00376;C16681	C20H28O	284.214	Prenol lipids	285.2	161.1	+	9.07	6543.06	3555.16	2588.37	4706.16	6330.93	8614.88	3416.24	7923.68	3953.2	1619.87	1147.71	2602.67		4293.49
63147@[M+H-H2O]+@RANK1	4-O-alpha-D-Galactopyranuronosyl-D-galacturonic acid	5894-59-7	C02273	C12H18O13	370.075	Organooxygen compounds	353.1	97	+	11.43	43577.2	92685.2	197546	296191	205251	201338	128706	225869	202016	262768	212389	296485	98858	205638
36036@[M+H-H2O]+@RANK1	13-HPODE_13-L-Hydroperoxylinoleic acid	33964-75-9	C04717	C18H32O4	312.23	Lipids	295.2	55.1	+	11.98	280931	203237	621778	693657	1.24312e+06	946267	783327	598284	206778	147476	81981.3	716286	725599	288689
41200@[M+H]+@RANK1	Chamazulene	529-05-5	C09633	C14H16	184.125	lipids	185.1	157.1	+	8.74	25339.7	24560	22918.7	31978.2	36996.8	15156.4	29775.8	22053.2	34798	22420.5	18860.9	37474.5	24480.1	22874
187@[M+H]+@RANK1	Palmitic acid	1957-10-03	C00249	C16H32O2	256.24	Lipids	257.2	57.1	+	12.92	493887	504575	557438	640827	973183	1.15331e+06	702749	853799	443270	511306	787715	626225	743061	1.15795e+06
4255@[M+NA]+@RANK1	DG(16:0/16:0/0:0)	30334-71-5	C00165	C35H68O5	568.507	Glycerolipids	591.5	313.3	+	13.42	2.82763e+06	8.09731e+06	485362	5.19628e+06	9.02642e+06	1.0333e+07	6.21912e+06	9.0072e+06	7.05246e+06	6.01667e+06	1.00749e+07	4.52401e+06	7.07905e+06	1.87943e+06
70306@[M+H]+@RANK1	Zeranol	26538-44-3	C14752	C18H26O5	322.178	Macrolides and analogues	323.2	305.2	+	11.85	4554	7070.85	15279.2	15254.6	6303	66989.7	17180	14193.7		16732.1	11984.9	2350.47	9886.62
70304@[M+H]+@RANK1_70305@[M+H]+@RANK1	alpha-Zearalenol;beta-Zearalenol	36455-72-8;71030-11-0	C14750;C14751	C18H24O5	320.162	Macrolides and analogues	321.2	303.2	+	5.39	37516.3	9288.55	28400.3	3349.08	1672.13	40152	5026.43	112496	2273.96	70122.2	54572.7	64291.1	3352.34	8303.65
65739@[M+H]+@RANK1	Benzoylagmatine		C02253	C12H18N4O	234.148		235.2	105	+	10.56	104765	30436.3	52852.5	140135	30078	14434.4	126375	26317.2	92017.7	29965.1	98873.8	136662	36739	23402.1
298@[M+H]+@RANK1	Urocanic acid	104-98-3	C00785	C6H6N2O2	138.043	Azoles	139.1	93	+	4.21	12481.6	16468.7	15278.6	33761.8	18592	12392.6	15417.9	29093.7	13766.9	7055.48	11754.5	21694.2	19333.7	15508.9
58224@[M+H]+@RANK1	Methylimidazole acetaldehyde	19639-03-3	C05827	C6H8N2O	124.064	Azoles	125.1	107.1	+	0.71	1806.34	5382	2391.36	4895.84	3376.35	1071.87		4507	1605.68	5112.67	8665.34	1199.93	3843.62	4447.18
65761@[M+H]+@RANK1	6-Methoxymellein	13410-15-6	C02381	C11H12O4	208.074	Benzopyrans	209.1	163.1	+	8.22	5874.94	6178.65	3233.89	4112.95	6503.21	6983.98	5867.45	6949.85	7221.03	4419.04	5769.19	7764.33	8510.92	7384.76
68667@[M+H]+@RANK1	Carbendazim	10605-21-7	C10897	C9H9N3O2	191.069	Benzimidazoles	192.1	160.1	+	4.1	5182.41	2056.33	1252.47	1033.91	3104.49	1263.01	3515.76	1665.48	2573.31	2057.98	5488.5	5257.26	3701.6	3389.66
5745@[M+H]+@RANK1	L-3-Phenyllactic acid	20312-36-1_7326-19-4	C05607	C9H10O3	166.063	Phenylpropanoic acids	167.1	91.1	+	10.1	14680.3	8306.07	12300.4	13771.3	15532.8	17712.5	13526.5	32177.3	7111.67	17835.4	15878.2	14367.8	11857	11388.9
69786@[M+H]+@RANK1	3-Methylsalicylaldehyde	824-42-0	C14087	C8H8O2	136.052	Benzaldehyde	137.1	119	+	10.56	60029.5	45199.1	21115.3	49324.4	49145.1	33660.6	25948.5	37286.3	47090.8	20748.5	38733.3	38891	14027.6	37827.7
317@[M+H]+@RANK1	Anthranilic acid	118-92-3	C00108	C7H7NO2	137.048	Benzoic acid derivatives	138.1	120	+	2.88	4390.42	7261.16	3036.78	5856.91	3851.98	5811.03	1482.04	4406.05	6263.36	3977.04	1332.37	12493.3	6260.86	3733.21
3261@[M+H]+@RANK1	p-Aminobenzoate	150-13-0	C00568	C7H7NO2	137.048	Benzoic acid derivatives	138.1	77	+	0.74	212416	151133	361657	482344	496828	99943.4	97611.6	89454.1	202776	117026	147201	238030	191612	255864
STD_14091-11-3@+@RANK1	2-Chloro-DL-Phenylalanine	14091-11-3		C9H10ClNO2	199.04	internal standards	200	154	+	3.85	1.17694e+08	1.37348e+08	1.48244e+08	1.40183e+08	1.38094e+08	1.45573e+08	1.45304e+08	1.44229e+08	1.41996e+08	1.43698e+08	1.47384e+08	1.27516e+08	1.41437e+08	1.38447e+08
65590@[M+H]+@RANK1	Benzoin	119-53-9	C01408	C14H12O2	212.084	Stilbenes	213.1	105	+	4.67	342.185	3952.13	4496.72	2125.18	1913.83	764.788	2673.82	4975.95	1091.94	2420.08	1102.14	3161.31	1181.89	1847.04
68856@[M+H]+@RANK1	5-Methyl-2-furaldehyde	620-02-0	C11115	C6H6O2	110.037	Aldehyde	111	55.1	+	0.76	117473	111763	93245.9	127107	73726.7	121781	87790.4	116391	98066.6	184850	96593.4	132802	119265	83996.2
66434@[M+H]+@RANK1	Deethylatrazine	6190-65-4	C06559	C6H10ClN5	187.062	Triazines	188.1	146	+	3.81	1.36901e+07	1.52387e+07	4.97841e+07	5.65271e+07	5.40073e+07	2.17456e+07	2.23012e+07	2.27021e+07	1.96601e+06	1.63665e+06	1.82927e+06	2.99894e+07	2.59162e+07	2.53843e+07
7013@[M+H]+@RANK1	6-Hydroxymelatonin	2208-41-5	C05643	C13H16N2O3	248.116	Tryptamine derivatives	249.1	190.1	+	5.76	1914.89	9007.55	999.845	3201.47	3069.76	5324.65	1344.74	3322.04	4354.88	2773.22	9234.22	4369.59	6339.46	3364.97
74@[M+H]+@RANK1	Serotonin	50-67-9	C00780	C10H12N2O	176.095	Tryptamine derivatives	177.1	160.1	+	2.61	46413		83432.1	99449.7	78255.6	232083	238345	241363	212180	173928	212186	38122	29313.7	31990.7
58223@[M+H]+@RANK1	D-Urobilin	3947-38-4	C05795	C33H40N4O6	588.295	Tetrapyrroles and derivatives	589.3	553.3	+	11.52		14068.2	11450.6		5446.55						6881.65			10111.5
43904@[M+H]+@RANK1	(-)-Salsoline	89-31-6	C09640	C11H15NO2	193.11	Tetrahydroisoquinolines	194.1	117.1	+	4.25	5567.55	9478.27	9692.5	8098.18	14865.6	22292.3	9286.79	9836.65	15733.2	14152	7677.39	17787.3	6497.86	13010.1
43210@[M+H]+@RANK1	Palmitoylethanolamide	544-31-0	C16512	C18H37NO2	299.282	Carboximidic acids and derivatives	300.3	62.1	+	12.61	2.11825e+06	2.79844e+06	2.5881e+06	2.62666e+06	2.68462e+06	7.50092e+06	6.25314e+06	7.76507e+06	5.70334e+06	6.06931e+06	6.37605e+06	3.8909e+06	3.86235e+06	4.39936e+06
1380@[M+H]+@RANK1	Bromocriptine	25614-03-3	C06856	C32H40BrN5O5	653.221	Ergoline and derivatives	654.2	636.2	+	12.04	14069.3	35140.1	14910.2	15249.6	5704.19	21520.8	21691.7	18335.5	22528.5	11226.7	3191.87	9387.91	12264.6	13129.9
36476@[M+H]+@RANK1	Panaxynol	81203-57-8	C17447	C17H24O	244.183	Miscellaneous	245.2	57	+	12.57	32237	26862.8	53638.7	51155.6	103282	101608	62381.8	46279.9	161591	96876.5	143410	60728	102138	109592
69416@[M+H]+@RANK1	Ethyl isovalerate	108-64-5	C12290	C7H14O2	130.099	Miscellaneous	131.1	57.1	+	1.19	1.32825e+06	666816	486672	637231	653658	1.55142e+06	1.13545e+06	1.47397e+06	2.47316e+06	1.67187e+06	1.80637e+06	886042	311590	812855
71484@[M+H]+@RANK1	Ligustilide	4431-01-0	C16987	C12H14O2	190.099	Miscellaneous	191.1	67.1	+	2.8	2937.63	3249.08	2584.63	3590.91	4227.19	4642.51	3046.47	3460.55	5274.26	3984.9	3095.77	4918.67	4708.57	7772.89
68201@[M+H]+@RANK1	Lusianthridin	87530-30-1	C10257	C15H14O3	242.094	Miscellaneous	243.1	183.1	+	9.99	1351.56	3815.02	3380.48	6273.73	4986.11	9176.35	9532.56	4339.73	5609.12	6684.38	9627.54	3797.84	2724.95	5456.64
45489@[M+H]+@RANK1	Agomelatine	138112-76-2		C15H17NO2	243.126	Miscellaneous	244.1	185.1	+	10	2508.26	4713.91	3456.78	7938.69	2876.73	1997.48	1820.81	3497.44	4053.18	7525.69	3971.86	6643.66	4091.05	3963.94
140@[M+H]+@RANK1	Erythritol	149-32-6	C00503	C4H10O4	122.058	Miscellaneous	123.1	43	+	6.17	14463.6	6673.28	10459.3	8239.8	8017.97	4382.35	4281.35	12625.1	8989.32	8217.07	7717.87	6963.4	13096.9	9618.48
66696@[M+H]+@RANK1	Allicin	539-86-6	C07600	C6H10OS2	162.017	Miscellaneous	163	41	+	10.57	6866.69	6327.71	10132.7	8330.14	17666.8	19095.9	5797.75	11387.8	7779.2	10264.4	6732.29	10627.5	8504.14	13298.1
36461@[M+H]+@RANK1	1-Octacosanol	557-61-9	C08387	C28H58O	410.449	Miscellaneous	411.5	393.4	+	13.2	434974	171238	707486	569260	435246	421239	510173	365975	347312	271867	544129	352930	380276	433038
71361@[M+H]+@RANK1	Baldrinal	18234-46-3	C16811	C12H10O4	218.058	Miscellaneous	219.1	159	+	8.35	4163.06	4174.62	3998.4	7290.22	6477.76	2932.87	4053.9	4991.65	2663.24	2423.25	6906.36	4492.56	10383.5	4331.73
3671@[M+H]+@RANK1	Astaxanthin	7542-45-2_472-61-7	C08580	C40H52O4	596.387	Miscellaneous	597.4	147.1	+	13.56	45115.4	82143.8	145654	114347	6664.26	71538.2	103963	5618.8	117971	163451	62952.3	3019.79	4951.96	7672.68
6383@[M+H]+@RANK1	3-Nitro-L-tyrosine	621-44-3		C9H10N2O5	226.059	Miscellaneous	227.1	181.1	+	8.73	6818.47	6624.27	4026.62	7951.19	10823.2	11883.5	8340.98	5127	8648.44	6742.96	8919.61	14153.6	9568.88	9381.45
3857@[M+H]+@RANK1	Tripalmitin	555-44-2		C51H98O6	806.736	Miscellaneous	807.7	551.5	+	12.58		4718.49		743.423		3946	668.831	3305.99				12735.2	669.33	1336
67007@[M+H]+@RANK1	Chelidonic acid	99-32-1	C08476	C7H4O6	184.001	Miscellaneous	185	69	+	1.39	295264	335246	283578	325263	366724	401568	268169	378575	641549	392632	667908	281900	240704	255431
93263@[M+H]+@RANK1	Torachrysone 8-O-glucoside	64032-49-1		C20H24O9	408.142	Miscellaneous	409.1	229.1	+	12.3	7919.54	14566.7	20241.1	7677.72	17781.9	21587.5	20249.9	20994.9	25590.2	6194.11	12722.9	24169.7	7525.61	12197.3
58318@[M+H]+@RANK1	Sulforaphane	4478-93-7		C6H11NOS2	177.028	Miscellaneous	178	72	+	0.66	23147.9	13037.5	8833.03	17424.5	4157.48	6289.3	15582.6	7923.77	9768.98	7686.91	9617.45	11775.2	11273.6	6323.37
66873@[M+H]+@RANK1	Alliin	556-27-4	C08265	C6H11NO3S	177.046	Miscellaneous	178.1	132	+	4.6	9361.67	3956.42	6988.33	4289.44	3980.99	6039.06	5174.24	4239.64	7016.47	6186.53	6090.37	4784.11	8112.22	4534.65
44659@[M+H]+@RANK1	L-Quebrachitol	642-38-6	C08257	C7H14O6	194.079	Miscellaneous	195.1	177.1	+	4.59	9521.98	12313.8	5982.06	14621.9	13599.1	7786.14	9320.54	9934.14	11578.9	8958.66	8488.66	6002.65	9430.18	10842.8
89783@[M+H]+@RANK1	D-Pinitol	10284-63-6	C03844	C7H14O6	194.079	Miscellaneous	195.1	177.1	+	0.62	52042.6	31703.2	22037.9	31759.2	29547.7	53209.3	50917.1	38505.9	23395.4	18070.4	19180.8	25089	38864.3	37541.1
64361@[M+H]+@RANK1	Cheilanthifoline	483-44-3	C05174	C19H19NO4	325.131	Miscellaneous	326.1	268.1	+	14.13	1060.87	1258.58	2430.78	1818.75	3147.71	1247.98	585.683	1960.63	2216.13	2338.22	1392.46	2518.34	3301.62	1741.16
44920@[M+H]+@RANK1	Fingolimod hydrochloride	162359-56-0		C19H33NO2	307.251	Miscellaneous	308.3	105.1	+	13.11	41728.8	37071.2	29921.7	35658.6	22594.5	14901.6	58982.2	29342.9	22820.1	23648.5	23722.9	37036.5	43712.2	35896.7
67623@[M+H]+@RANK1	Bakkenolide A	19906-72-0	C09350	C15H22O2	234.162	Miscellaneous	235.2	149.1	+	11.85	35306.2	35660.8	42914.4	17909.1	44085.8	31396.7	34004.1	17556.9	21816.7	16926.5		46679.1	25917.9	55755.8
71436@[M+H]+@RANK1	3-Butylidenephthalide	551-08-6	C16924	C12H12O2	188.084	Miscellaneous	189.1	79.1	+	8.74	4141.07	3223.96	18412.9	8038.13	10839.2	6048	12272.1	7667.68	1148.91	12955.2	5564.8	5122.5	10338.9	4208.23
89800@[M+H]+@RANK1	Furfuryl acetate	623-17-6		C7H8O3	140.047	Miscellaneous	141.1	81	+	5.47	8036.32	4976.14	9167.76	3420.43	3346.56	6601.77	7395.52	9282.85	10368.1	10106.1	5638.34	4804.5	6032.03	5084.73
85349@[M+H]+@RANK1	Pregabalin	148553-50-8		C8H17NO2	159.126	Miscellaneous	160.1	55.1	+	0.69	74301.1	95621.6	285775	279211	272073	57840.8	106628	96695.7	32963.2	44454.1	65431.3	115778	160905	157640
64528@[M+H]+@RANK1	Sinalbin	20196-67-2	C08426	C14H19NO10S2	425.045	Miscellaneous	426.1	151	+	13.23	14955.5	10419.4	13589	29121.9	16114.6	4033.79	8738.82	11804.4	12470.1	8312.89	13676	16642.3	12877.7	8776.18
66960@[M+H]+@RANK1	Glucoraphanin	21414-41-5	C08419	C12H23NO10S3	437.048	Miscellaneous	438.1	163	+	8.73	30705.5	34558.1	86503.4	246459	161612	111693	44069.1	100134	24106	18429	36319.4	36052.7	75338.5	144989
103@[M+H]+@RANK1	(R)-Acetoin	513-86-0_53584-56-8	C00810;C00466	C4H8O2	88.0524	Miscellaneous	89.1	71	+	0.53	79060.5	38462	46694.2	58660	55841.3	96089.7	95349.2	37964.6	84979.2	50524.6	48504.9	66341.4	32947.6	63995.4
71362@[M+H]+@RANK1	Homobaldrinal	67910-07-0	C16812	C15H16O4	260.105	Miscellaneous	261.1	159	+	10	15996.7	10948	26696.3	38791.6	25936.3	3984.59	6192.45	39473.9	8409.46	6125.83	7037.8	35361.7	39210.1	20334.5
91474@[M+H]+@RANK1	Homodihydrocapsaicin I	20279-06-5		C19H31NO3	321.23	Miscellaneous	322.2	137.1	+	13.31	25324.5	11652.1	18526.8	17373.3	10773.7	19466.8	14595.1	16145.9	11334.4	21625.5	26599	15737.4	14799.9	11087
89890@[M+H]+@RANK1	Methyl linoleate	112-63-0		C19H34O2	294.256	Miscellaneous	295.3	55.1	+	12	280931	203237	621778	693657	1.24312e+06	946267	783327	598284	206778	147476	81981.3	716286	725599	288689
91804@[M+H]+@RANK1	Undecanolactone	710-04-3		C11H20O2	184.146	Miscellaneous	185.2	43.1	+	0.57	40239.5	40353	52322.6	54618	60038.7	109804	125527	111360	150246	116489	147302	64357.5	61227	54678.1
66928@[M+H]+@RANK1	Diallyl disulfide	2179-57-9	C08369	C6H10S2	146.022	Miscellaneous	147	41	+	0.68	1.18571e+06	948169	585719	670891	576317	1.50157e+06	1.61295e+06	1.60509e+06	3.41448e+06	2.42776e+06	3.48379e+06	1.08402e+06	1.27141e+06	1.05466e+06
44874@[M+H]+@RANK1	Isoxanthopterin	529-69-1	C03975	C6H5N5O2	179.044	Pteridines and derivatives	180.1	135	+	3.26	11398	12247.9	19788.4	22959.3	14813.5	11024.3	7687.57	8800.17	16983.9	9592.34	14198.7	29511.4	24857.6	22163.8
43305@[M+H]+@RANK1	Phendimetrazine	634-03-7	C07904	C12H17NO	191.131	Oxazinanes	192.1	91.1	+	10.56	16705.9	8158.24	9637.31	13999	12738.6	11810.9	20287.3	15855.3	11402.5	7623.79	17464.1	13395	27920.4	14672.7
61672@[M+H]+@RANK1	Tetrahydroaldosterone-3-glucuronide	20605-81-6	C03033	C27H40O11	540.257	Organooxygen compounds	541.3	347.2	+	0.72	1615	8506.13	8818.06	9215.83	11993.9	8035.34	3697.93	5817.66	15100.9	9117.06	5591.1	11626.4	5991.36	6705.23
61643@[M+H]+@RANK1	Cortolone-3-glucuronide	56162-46-0	C03033	C27H42O11	542.273	Organooxygen compounds	543.3	349.2	+	12.3	5546.75	5448.72	2286	6245.98	8007.47	1584.79	21003.7	15365.4	9526.76		13456.1	6200.45		9630
45856@[M+H]+@RANK1	Glyceric acid	473-81-4	C00258	C3H6O4	106.027	Organooxygen compounds	107	89	+	0.55	140793	139593	278744	218461	269104	281804	77845.8	72921	103830	293018	113065	234269	248891	178343
58549@[M+H]+@RANK1	Beta-D-Fructose 2-phosphate	19046-69-6	C03267	C6H13O9P	260.03	Organooxygen compounds	261	99	+	0.75	1.20317e+06	763749	855353	614271	796561	972632	589553	943733	742021	804419	1.01086e+06	867476	648339	692031
278@[M+H]+@RANK1	Betaine aldehyde	7418-61-3	C00576	C5H11NO	101.084	Organonitrogen compounds	102.1	58.1	+	0.75	16820.7	11711	18474.5	26687.6	19642.3	17971.5	9582.59	8527.37	7672.06	4540.57	6489.49	10929.5	11513.1	10183.5
379@[M+NA]+@RANK1	Glucose 1-phosphate	59-56-3	C00103	C6H13O9P	260.03	Organooxygen compounds	283	121	+	13	1.71771e+06	1.47036e+06	2.25443e+06	1.93232e+06	2.404e+06	2.38579e+06	2.456e+06	2.47517e+06	2.52147e+06	1.42447e+06	2.12802e+06	1.79828e+06	2.61024e+06	2.24557e+06
4005@[M+H]+@RANK1	Dyclonine	586-60-7	C07881	C18H27NO2	289.204	Organooxygen compounds	290.2	98.1	+	5.96	899.346	5038.45	2901.97	6063.73	910.917	7839.99	3842.83	3897.73			1362.32	4891.84	3718.66	3038.08
63232@[M+H]+@RANK1	N,N'-diacetylchitobiose	35061-50-8	C01674	C16H28N2O11	424.169	Organooxygen compounds	425.2	204.1	+	0.77	6244.04	20556.2	35618.2	32508.6	25197.6	28147.8	43615.7	35555.2	30724.4	15222.5	27637.4	30564.9	31399.9	25071.1
44136@[M+H]+@RANK1	Hygromycin B	31282-04-9	C01925	C20H37N3O13	527.233	Organooxygen compounds	528.2	177.1	+	4.48	9614.09	16285.3	42045.8	32438.2	28667.6	16609.2	43943.2	15825.6	19451.3	13892.4	23548	25357.3	28885.7	40368.2
61642@[M+H]+@RANK1	Inodxyl glucuronide	35804-66-1	C03033	C14H15NO7	309.085	Organooxygen compounds	310.1	134.1	+	11.63	2741.31	7332.45	1397.36			13458.5	5204.1	2277	772.726		683.15	5717.02	3020.58	1371.02
61662@[M+H]+@RANK1	1-(alpha-Methyl-4-(2-methylpropyl)benzeneacetate)-beta-D-Glucopyranuronic acid	115075-59-7	C03033	C19H26O8	382.163	Organooxygen compounds	383.2	189.1	+	12.18	12912.7	26721	17846	22227.2	37986	11393.2	7737.17	28264.4	36583.5	50372.4	32102	17970.2	25587.4	17995.3
66953@[M+H]+@RANK1	Glucoiberin	554-88-1	C08411	C11H21NO10S3	423.033	Organooxygen compounds	424	149	+	10.47	5119.94	8668.19	6911.91	7992.73	5087.57	5588.39	9937.09	6967.85	3893.03	1169.97	3756.58	9038.87	5304.03	2916.62
61647@[M+H]+@RANK1_61666@[M+H]+@RANK1	Benzoyl glucuronide (Benzoic acid);2-Phenylethanol glucuronide	19237-53-7;18997-55-2	C03033	C13H14O8;C14H18O7	298.069	Organooxygen compounds	299.1	105.05	+	12.07	10438.4	18499	2638.67	20949	10763.2	24557.1	12574.9	12106.6	21232.3	11692.3	30078.9	21377.6	7772.76	15724.2
5987@[M+NA]+@RANK1	Mannose 6-phosphate	3672-15-9	C00275	C6H13O9P	260.03	Organooxygen compounds	283	185	+	13.03	88111.8	85651.5	113452	138903	185811	167148	161768	124916	135920	109942	116324	124346	131605	154476
66134@[M+H]+@RANK1	N,N-Dimethyl-1,4-phenylenediamine	99-98-9	C04203	C8H12N2	136.1	Amines	137.1	120.1	+	2.56	9830.18	9130.13	14061	26988.5	5466.25	30783.3	4555.28	35007	11070.3	5325.75	3871.35	36799.9	20324.8	2600.99
592@[M+H]+@RANK1	Streptozotocin	18883-66-4	C07313	C8H15N3O7	265.091	Organooxygen compounds	266.1	140.1	+	0.72	273367	1.04834e+06	1.01883e+06	575872	945741	952163	942211	2.64046e+06	1.92656e+06	1.79984e+06	2.64316e+06	1.22763e+06	1.23298e+06	806478
70060@[M+H]+@RANK1	2(3H)-Benzothiazolethione	149-30-4	C14437	C7H5NS2	166.986	Benzothiazoles	168	124	+	2.57	3915.07	3274.33	4561.16	4775.97	4906.29	3600.16	2373.04	1162.13	5498.45	2931.81	1632.97	3260.76	1659.77	4655.7
58012@[M+H]+@RANK1	7-Methylguanine	578-76-7	C02242	C6H7N5O	165.065	Imidazopyrimidines	166.1	149	+	1.56	6283	6506.24	12387.9	27719.5	12137.4	4352.19	6102.65	6790.68	10747.5	2616.98	3257.6	6408.08	9627.66	5387.34
44875@[M+H]+@RANK1	1-Indanone_Indanone	83-33-0	C01504	C9H8O	132.058	Indanes	133.1	105.1	+	12.3	44867.7	25908.4	35083	31376.2	63647.8	43867	60330.1	72342.5	52007.7	54007.2	53837.3	37298.4	60291.7	60039.9
43294@[M+H]+@RANK1	Oxymorphone	76-41-5	C08019	C17H19NO4	301.131	Phenanthrenes and derivatives	302.1	284.1	+	11.18	184245	154577	379085	387093	407682	396727	384333	409590	294712	172588	318212	543104	452200	417583
57996@[M+H]+@RANK1	Taurohyocholate	32747-07-2	C15516	C26H45NO7S	515.292		516.3	109	+	11.43	12375.5	13025.9	22342.3	50831	12829.9	30778.7		34018.2	44664.5	12952.8	18473.7	28530.7	20932.8	27989.6
36293@[M+H]+@RANK1	8(R)-HPETE		C04822	C20H32O4	336.23		337.2	149.1	+	11.58	39166.9	75995.5	109417	235605	91845.8	170082	115963	178118	71097.7	112322	29139.2	168117	114721	88446.6
72158@[M+H]+@RANK1	5-Carboxyvanillic acid	2134-91-0	C18338	C9H8O6	212.032		213	167	+	3.52	4646.91	3382.15	4733.65	2922.08	4894.77	4948.66	2884.16	4185.35	3025.16	4545.22	5004.67	6547.94	4029.31	5897.15
58355@[M+H]+@RANK1	4-Hydroxyphenylacetylglutamic acid		C05595	C13H15NO6	281.09		282.1	107	+	12.99	1.73341e+07	2.09797e+07	2.21542e+07	2.63993e+07	2.57046e+07	2.58857e+07	2.53799e+07	2.59713e+07	2.58646e+07	1.93552e+07	2.83132e+07	2.74643e+07	3.10239e+07	3.00163e+07
362@[M+H]+@RANK1	O-Succinyl-L-homoserine	1492-23-5	C01118	C8H13NO6	219.074		220.1	102.1	+	2.28	6032.9	3474.24	2209.84	4096.97	1267.16	2017.09	2381.15	1685.16	2111.32	7848.5	4526.64	1237.28	2384.58	2363.76
485@[M+H]+@RANK1	Ketopantoic acid	470-30-4	C00966	C6H10O4	146.058		147.1	73.1	+	0.7	137377	189638	421739	418981	464931	585092	462904	592465	188168	159946	278468	612322	609133	540935
