# Supplementary material for: Integrative Analysis of Metabolome and Transcriptome Provides Insights into the Mechanism of Flower Induction in Pineapple (Ananas comosus (L.) Merr.) by Ethephon
Source: Int J Mol Sci. 2023 Dec 5;24(24):17133. doi: 10.3390/ijms242417133 (PMC10742410; doi:10.3390/ijms242417133)
Supplement: Supplementary file 1 [file ijms-24-17133-s001.zip › Table S2.xlsx]

## Sheet: Sheet1
	Table S2 Summary of pineapple transcriptome
Sample	Raw Data	Clean Data (%)	Total reads	Total_Mapped (%)
BL-0d-1	40913248	40693802 (99.46%)	40676380	30107000 (74.02%)
BL-0d-2	46951252	46765226 (99.60%)	46734608	35883530 (76.78%)
BL-0d-3	52145620	51908948 (99.55%)	51879514	39456355 (76.05%)
BL-8d-1	50595404	50374788 (99.56%)	50353792	40845909 (81.12%)
BL-8d-2	42843734	42664510 (99.58%)	42639046	34851420 (81.74%)
BL-8d-3	54645416	54427760 (99.60%)	54398906	44631057 (82.04%)
BL-18d-1	43758068	43568768 (99.57%)	43545830	37328093 (85.72%)
BL-18d-2	42264306	42089216 (99.59%)	42062120	35661079 (84.78%)
BL-18d-3	51619580	51410896 (99.60%)	51384720	43954978 (85.54%)
BL-34d-1	50983094	50761088 (99.56%)	50730694	42571532 (83.92%)
BL-34d-2	49687934	49489588 (99.60%)	49459058	41619943 (84.15%)
BL-34d-3	50014966	49814748 (99.60%)	49786350	41602019 (83.56%)
