# Supplementary material for: Integrative Analysis of Metabolome and Transcriptome Provides Insights into the Mechanism of Flower Induction in Pineapple (Ananas comosus (L.) Merr.) by Ethephon
Source: Int J Mol Sci. 2023 Dec 5;24(24):17133. doi: 10.3390/ijms242417133 (PMC10742410; doi:10.3390/ijms242417133)
Supplement: Supplementary file 1 [file ijms-24-17133-s001.zip › Table S3.xlsx]

## Sheet: Sheet1
			Table S3 GO enrichment of DEGs
	ID	Class	Descrption	Pvalue	Qvalue	Numbers	Up-numbers	Down-numbers
BL-0d-vs-BL-8d	GO:0020037	Molecular Function	heme binding	1.32175e-09	1.34818e-06	42	19	23
	GO:0016491	Molecular Function	oxidoreductase activity	5.32195e-09	1.83429e-06	139	66	73
	GO:0046906	Molecular Function	tetrapyrrole binding	5.39497e-09	1.83429e-06	43	20	23
	GO:0016705	Molecular Function	oxidoreductase activity, acting on paired donors, with incorporation or reduction of molecular oxygen	1.229e-08	3.13396e-06	44	21	23
	GO:0005887	Cellular Component	integral component of plasma membrane	4.44297e-08	1.69721e-05	38	16	22
	GO:0031226	Cellular Component	intrinsic component of plasma membrane	1.71741e-07	3.28026e-05	40	17	23
	GO:0005506	Molecular Function	iron ion binding	5.29814e-07	0.000108082	35	15	20
	GO:0051119	Molecular Function	sugar transmembrane transporter activity	6.95372e-07	0.000118213	24	12	12
	GO:0015144	Molecular Function	carbohydrate transmembrane transporter activity	2.80217e-06	0.000357277	24	12	12
	GO:1901476	Molecular Function	carbohydrate transporter activity	2.80217e-06	0.000357277	24	12	12
	GO:0005576	Cellular Component	extracellular region	5.68633e-06	0.000724059	40	16	24
	GO:0015267	Molecular Function	channel activity	1.93399e-05	0.00197267	26	8	18
	GO:0022803	Molecular Function	passive transmembrane transporter activity	1.93399e-05	0.00197267	26	8	18
	GO:0055114	Biological Process	oxidation-reduction process	1.21243e-06	0.00303472	129	61	68
	GO:0044459	Cellular Component	plasma membrane part	3.62151e-05	0.00345854	45	22	23
	GO:0009072	Biological Process	aromatic amino acid family metabolic process	3.1896e-06	0.00399178	22	15	7
	GO:0022838	Molecular Function	substrate-specific channel activity	8.5234e-05	0.00790352	22	7	15
	GO:0008519	Molecular Function	ammonium transmembrane transporter activity	0.00015058	0.0127993	15	8	7
	GO:0015103	Molecular Function	inorganic anion transmembrane transporter activity	0.000265084	0.0171774	32	12	20
	GO:0015114	Molecular Function	phosphate ion transmembrane transporter activity	0.000272926	0.0171774	30	10	20
BL-8d-vs-BL-18d	GO:0015291	Molecular Function	secondary active transmembrane transporter activity	5.45611e-10	7.02201e-07	56	19	37
	GO:0016491	Molecular Function	oxidoreductase activity	7.47281e-09	4.80875e-06	228	84	144
	GO:0016705	Molecular Function	oxidoreductase activity, acting on paired donors, with incorporation or reduction of molecular oxygen	1.17272e-08	5.03095e-06	66	26	40
	GO:0005887	Cellular Component	integral component of plasma membrane	6.35009e-08	3.17504e-05	60	20	40
	GO:0031226	Cellular Component	intrinsic component of plasma membrane	1.273e-07	3.1825e-05	65	23	42
	GO:0042910	Molecular Function	xenobiotic transporter activity	1.42072e-07	3.42599e-05	29	8	21
	GO:0015238	Molecular Function	drug transmembrane transporter activity	1.5972e-07	3.42599e-05	42	11	31
	GO:0090484	Molecular Function	drug transporter activity	1.5972e-07	3.42599e-05	42	11	31
	GO:0015893	Biological Process	drug transport	2.22864e-08	6.43631e-05	43	11	32
	GO:0016021	Cellular Component	integral component of membrane	6.50191e-07	8.65538e-05	216	78	138
	GO:0031224	Cellular Component	intrinsic component of membrane	6.9243e-07	8.65538e-05	222	81	141
	GO:0015297	Molecular Function	antiporter activity	4.84051e-07	8.89962e-05	36	11	25
	GO:0020037	Molecular Function	heme binding	6.09287e-07	9.8019e-05	55	19	36
	GO:0046906	Molecular Function	tetrapyrrole binding	1.87667e-06	0.000249026	57	20	37
	GO:0005506	Molecular Function	iron ion binding	1.93493e-06	0.000249026	51	18	33
	GO:0006855	Biological Process	drug transmembrane transport	1.99049e-07	0.000287427	37	8	29
	GO:0022804	Molecular Function	active transmembrane transporter activity	3.07946e-06	0.000360297	93	26	67
	GO:0015837	Biological Process	amine transport	6.50024e-07	0.000430144	28	6	22
	GO:0009074	Biological Process	aromatic amino acid family catabolic process	7.19106e-07	0.000430144	22	5	17
	GO:0055085	Biological Process	transmembrane transport	7.4471e-07	0.000430144	143	48	95
BL-18d-vs-BL-34d	GO:0031226	Cellular Component	intrinsic component of plasma membrane	1.4454e-11	9.59743e-09	139	108	31
	GO:0046906	Molecular Function	tetrapyrrole binding	1.67297e-11	2.94777e-08	128	92	36
	GO:0005887	Cellular Component	integral component of plasma membrane	1.19328e-10	3.96168e-08	123	94	29
	GO:0020037	Molecular Function	heme binding	8.47683e-11	5.13316e-08	118	83	35
	GO:0016491	Molecular Function	oxidoreductase activity	8.73977e-11	5.13316e-08	501	330	171
	GO:0015291	Molecular Function	secondary active transmembrane transporter activity	1.52888e-10	6.7347e-08	103	65	38
	GO:0031224	Cellular Component	intrinsic component of membrane	2.29316e-09	5.07552e-07	503	371	132
	GO:0015893	Biological Process	drug transport	4.41023e-10	1.85847e-06	82	54	28
	GO:0022857	Molecular Function	transmembrane transporter activity	6.85239e-09	2.38809e-06	357	256	101
	GO:0015238	Molecular Function	drug transmembrane transporter activity	9.98054e-09	2.38809e-06	80	52	28
	GO:0090484	Molecular Function	drug transporter activity	9.98054e-09	2.38809e-06	80	52	28
	GO:1904680	Molecular Function	peptide transmembrane transporter activity	1.08426e-08	2.38809e-06	60	45	15
	GO:0008028	Molecular Function	monocarboxylic acid transmembrane transporter activity	1.25635e-08	2.45965e-06	66	50	16
	GO:0055085	Biological Process	transmembrane transport	1.69244e-09	3.56598e-06	319	223	96
	GO:0016705	Molecular Function	oxidoreductase activity, acting on paired donors, with incorporation or reduction of molecular oxygen	2.43271e-08	4.28643e-06	124	81	43
	GO:0006855	Biological Process	drug transmembrane transport	4.23086e-09	5.94295e-06	71	49	22
	GO:0016053	Biological Process	organic acid biosynthetic process	5.64661e-09	5.9487e-06	308	191	117
	GO:0015197	Molecular Function	peptide transporter activity	3.87809e-08	6.21199e-06	64	49	15
	GO:0016021	Cellular Component	integral component of membrane	4.41837e-08	7.33449e-06	480	350	130
	GO:0046394	Biological Process	carboxylic acid biosynthetic process	1.59037e-08	1.34036e-05	303	188	115
