# Supplementary material for: Integrative Analysis of Metabolome and Transcriptome Provides Insights into the Mechanism of Flower Induction in Pineapple (Ananas comosus (L.) Merr.) by Ethephon
Source: Int J Mol Sci. 2023 Dec 5;24(24):17133. doi: 10.3390/ijms242417133 (PMC10742410; doi:10.3390/ijms242417133)
Supplement: Supplementary file 1 [file ijms-24-17133-s001.zip › Table S4.xlsx]

## Sheet: Sheet1
Table S4 The primers of qRT-PCR
Name	Sequences of primers
Acactin F	5’-CTGGCCTACGTGGCACTTGACTT-3’
Acactin R	5’-CACTTCTGGGCAGCGGAACCTTT-3’
ANT F	5’-CAGCAGCGAGATCCTCCG-3’
ANT R	5’-CCCGCTGTCGTCGATCTC-3’
GRL F	5’-AGGTGCGCACAAACCCAA-3’
GRL R	5’-TTTTGGTCCTCCGCGCTT-3’
AGL9 F	5’-ATCTTCTCCAACCGCGGC-3’
AGL9 R	5’-GGGACGGCAGCCTTTGAT-3’
AP2 F	5’-CTGGGCAAGGATGACGCA-3’
AP2 R	5’-GAGCATGGCAGTCACGGT-3’
MADS14 F	5’-CCTGAAGAAGGCGCACGA-3’
MADS14 R	5’-GCTGGAATCGGTGGCGTA-3’
SPL14 F	5’-TGATCGATTCGCCTCCGC-3’
SPL14 R	5’-CGTGGGCGAGAAGACGTT-3’
SPL16 F	5’-CGAACGAGGCCGAGATCC-3’
SPL16 R	5’-GGAGTGTTTGGGAGGCCC-3’
SS2 F	5’-GCCGGAAGCAAGGACACT-3’
SS2 R	5’-CGACATGTCAGCCCCAGG-3’
bHLH94 F	5’-CGCTTCTCCCTTCGCCAA-3’
bHLH94 R	5’-TCTCGACCACCGTCACCT-3’
TCP13 F	5’-TGGTCCGCGGCCTTTATC
TCP13 R	5’-ACTCTTTGCCGCGCTCTT
MYB90 F	5’GCAAGGCTCTTCCCTGGG-3’
MYB90 R	5’GGCCTCCTCCTCCTGGAA-3’
GPT2 F	5’AAGTCGGTTGGCGGGATG-3’
GPT2 R	5’CCTTCTCCCAACCTGCCG-3’
